# Supplementary material for: Controllable transformation of biomass-derived diols over an ammonia-modified H-Beta zeolite
Source: Royal Society of Chemistry journal article supplement (doi:10.1039/d4nj02043j), 2024-01-01
Supplement: d4nj02043j1.pdf [file d4nj02043j1.pdf]

## Supplementary Information

### **Controllable transformation of biomass-derived diols over ammonia-modified H-Beta zeolite**

Shuo Ai,\* Zhenhua Huang, Zhenhua Feng, Kaili Gao, Linghui Liu

*College of Biological and Chemical Engineering, Guangxi University of Science and  
Technology, Liuzhou 545006, China*

Corresponding authors: Shuo Ai, 100001928@gxust.edu.cn

**Fig. S1** GC-MS data of the volatile reaction products.

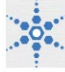

# ChemLab Technologies - GC/MS Report

|                            |                                     |                             |                      |
|----------------------------|-------------------------------------|-----------------------------|----------------------|
| Data File:                 | 12                                  | Original Data Path:         | E:\GCMS Data\ChemLab |
| Current Data Path:         | E:\GCMS Data\ChemLab                | Sample Type:                | Unknown              |
| Sample ID:                 | 4                                   | Sample Name:                |                      |
| Operator:                  | W. T                                | Acquisition Date:           | 08/14/19 11:25:14 AM |
| Run Time(min):             | 16.58                               | Comments:                   |                      |
| Vial:                      | 1                                   | Injection Volume(μl):       | 10.00                |
| Scans:                     | 4877                                | Low Mass(m/z):              | 50                   |
| High Mass(m/z):            | 400                                 | Sample Volume(μl):          | 0.00                 |
| Sample Weight:             | 0.00                                | ISTD Amount:                | 0.000                |
| Calibration Level:         |                                     | Dilution Factor:            | 1.00                 |
| Instrument Method:         | E:\GCMS<br>Methods\ChemLab\CLT.meth | Original Processing Method: |                      |
| Current Processing Method: | N/A                                 | Calibration File:           | N/A                  |

|                                 |                       |
|---------------------------------|-----------------------|
| Method type:                    | Acquisition - General |
| MS transfer line temperature:   | 270 °C                |
| Ion source temperature:         | 260 °C                |
| Use acquisition threshold:      | No                    |
| Ionization mode:                | EI                    |
| Run completion:                 | GC run time           |
| Segment #1:                     |                       |
| Start time:                     | 0.5 min               |
| Filament/multiplier/dynode on:  | Yes                   |
| Chromatography filter on:       | Yes                   |
| Chrom. filter peak width time:  | 1 sec                 |
| Use tune file emission current: | Yes                   |
| Use last tuned detector gain:   | Yes                   |
| Use tune file electron energy:  | Yes                   |
| Calibration gas:                | Off                   |
| Scan #1                         |                       |
| Tune file:                      | (Last Saved)          |
| Ion polarity:                   | Positive              |
| Data type:                      | Centroid              |
| Start mass:                     | 50 amu                |
| End mass:                       | 400 amu               |
| Scan time:                      | 0.2 sec               |

NOTICE: If this method uses a linked external file in timed mode or is used for an AutoSIM acquisition run, please see the scan header report in the raw file for scan event source information.

-----

|                            |             |
|----------------------------|-------------|
| Acquisition Time           |             |
| Use oven run time:         | Yes         |
| Oven Method                |             |
| Maximum temperature:       | 280.0 °C    |
| Prep-run timeout:          | 10.00 min   |
| Equilibration time:        | 0.50 min    |
| Ready delay:               | 0.00 min    |
| Oven on/off:               | On          |
| Cryogenics enable:         | Off         |
| Cryogenics threshold:      | 50.0 °C     |
| Cryogenics timeout:        | 60.00 min   |
| Initial temperature:       | 60.0 °C     |
| Initial hold time:         | 5.00 min    |
| Number of ramps:           | 1           |
| Ramp 01 rate:              | 30.0 °C/min |
| Ramp 01 final temperature: | 270.0 °C    |
| Ramp 01 hold time:         | 5.00 min    |

|                        |                   |
|------------------------|-------------------|
| S/SL - Front Method    |                   |
| S/SL mode:             | Split             |
| Temperature enable:    | On                |
| Temperature:           | 250 °C            |
| Split flow enable:     | On                |
| Split flow:            | 20.0 mL/min       |
| Purge flow:            | 5.0 mL/min        |
| Constant septum purge: | On                |
| Carrier mode:          | Constant Pressure |

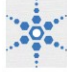

# ChemLab Technologies - GC/MS Report

Carrier pressure enable: On  
Carrier pressure: 80.00 kPa  
Vacuum compensation: On  
Carrier gas saver enable: On  
Carrier gas saver flow: 25.0 mL/min  
Carrier gas saver time: 2.00 min  
Backflush enable: On  
Backflush start time: 1.50 min  
Backflush duration: GC Run Time

Run Table Method  
Ext. event #1 prep-run value: Off  
Ext. event #2 prep-run value: Off  
Ext. event #3 prep-run value: Off  
Ext. event #4 prep-run value: Off  
Ext. event #5 prep-run value: Off  
Ext. event #6 prep-run value: Off  
Ext. event #7 prep-run value: Off  
Ext. event #8 prep-run value: Off  
Aux. oven event #1 prep-run value: Off  
Aux. oven event #2 prep-run value: Off  
Aux. oven event #3 prep-run value: Off  
Aux. oven event #4 prep-run value: Off  
Aux. oven event #5 prep-run value: Off  
Aux. oven event #6 prep-run value: Off  
Aux. oven event #7 prep-run value: Off  
Aux. oven event #8 prep-run value: Off

-----  
Sampling  
Sample volume (µl): 0.10  
Plunger strokes: 3  
Viscous sample: Yes  
Sampling depth in vial: Center

Injection  
Injection depth: Standard  
Pre-Inj dwell time (s): 0.0  
Post-Inj dwell time (s): 0.0

Washes  
Pre-Inj solvent: C  
Pre-Inj solvent cycles: 3  
Sample rinses: 3  
Post-Inj solvent: D  
Post-Inj solvent cycles: 3

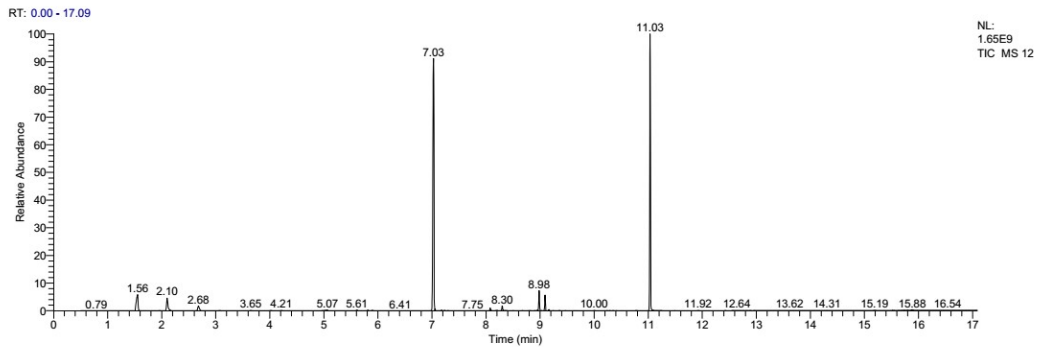

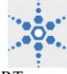

# ChemLab Technologies - GC/MS Report

| RT    | Peak Height   | Peak Width | Peak Area     | Area % | S/N       | BL | Saturated |
|-------|---------------|------------|---------------|--------|-----------|----|-----------|
| 1.55  | 83355384.23   | 0.21       | 214237490.37  | 4.61   | 35175.59  | BB | No        |
| 1.96  | 1162446.26    | 0.06       | 2308725.54    | 0.05   | 490.55    | BB | No        |
| 2.10  | 59292739.24   | 0.14       | 139854125.69  | 3.01   | 25021.27  | BB | No        |
| 2.40  | 592622.78     | 0.05       | 1090843.76    | 0.02   | 250.08    | BB | No        |
| 2.68  | 23804719.33   | 0.15       | 61232793.58   | 1.32   | 10045.48  | BB | No        |
| 3.07  | 1573377.80    | 0.09       | 3842102.85    | 0.08   | 663.96    | BB | No        |
| 3.64  | 1987226.79    | 0.07       | 4705592.22    | 0.10   | 838.60    | BB | No        |
| 4.02  | 1799746.81    | 0.09       | 4810867.06    | 0.10   | 759.48    | BB | No        |
| 4.21  | 2081716.91    | 0.09       | 5766889.26    | 0.12   | 878.48    | BB | No        |
| 4.40  | 808900.75     | 0.07       | 2189193.07    | 0.05   | 341.35    | BB | No        |
| 5.06  | 3619155.64    | 0.18       | 19215111.95   | 0.41   | 1527.27   | BB | No        |
| 5.20  | 411748.74     | 0.05       | 799819.64     | 0.02   | 173.76    | BB | No        |
| 5.61  | 3579719.03    | 0.07       | 7418134.08    | 0.16   | 1510.63   | BB | No        |
| 5.81  | 3244262.83    | 0.07       | 6435784.87    | 0.14   | 1369.06   | BB | No        |
| 5.90  | 2837849.73    | 0.06       | 5385612.05    | 0.12   | 1197.56   | BB | No        |
| 6.41  | 443263.06     | 0.04       | 658277.36     | 0.01   | 187.06    | BB | No        |
| 7.02  | 1202812221.19 | 0.17       | 2188553364.20 | 47.11  | 507581.30 | BB | No        |
| 7.17  | 2469016.97    | 0.09       | 5747448.72    | 0.12   | 1041.91   | BB | No        |
| 7.23  | 1936245.91    | 0.06       | 3827874.04    | 0.08   | 817.09    | BB | No        |
| 7.30  | 1104699.42    | 0.05       | 1776275.22    | 0.04   | 466.18    | BB | No        |
| 7.75  | 454428.62     | 0.06       | 1153748.21    | 0.02   | 191.77    | BB | No        |
| 8.08  | 10731010.88   | 0.09       | 19465126.14   | 0.42   | 4528.44   | BB | No        |
| 8.20  | 2122314.62    | 0.09       | 5722391.30    | 0.12   | 895.61    | BB | No        |
| 8.30  | 18178673.74   | 0.09       | 32486440.09   | 0.70   | 7671.32   | BB | No        |
| 8.38  | 1160399.44    | 0.10       | 3074077.43    | 0.07   | 489.68    | BB | No        |
| 8.50  | 539599.23     | 0.06       | 1321522.39    | 0.03   | 227.71    | BB | No        |
| 8.67  | 700598.03     | 0.06       | 1315253.52    | 0.03   | 295.65    | BB | No        |
| 8.79  | 731578.08     | 0.08       | 2166702.17    | 0.05   | 308.72    | BB | No        |
| 8.90  | 597080.63     | 0.03       | 809051.49     | 0.02   | 251.97    | BB | No        |
| 8.98  | 74220834.19   | 0.14       | 121774724.57  | 2.62   | 31320.86  | BB | No        |
| 9.09  | 57691954.07   | 0.07       | 91078670.14   | 1.96   | 24345.74  | BB | No        |
| 9.16  | 3945115.92    | 0.06       | 6390612.50    | 0.14   | 1664.82   | BB | No        |
| 9.24  | 451897.10     | 0.03       | 616832.01     | 0.01   | 190.70    | BB | No        |
| 9.36  | 1210044.08    | 0.05       | 1831396.39    | 0.04   | 510.63    | BB | No        |
| 9.47  | 541146.60     | 0.05       | 877537.05     | 0.02   | 228.36    | BB | No        |
| 9.65  | 417906.27     | 0.05       | 873024.60     | 0.02   | 176.35    | BB | No        |
| 10.00 | 1171646.82    | 0.12       | 2573186.81    | 0.06   | 494.43    | BB | No        |
| 10.24 | 463599.80     | 0.05       | 754200.90     | 0.02   | 195.64    | BB | No        |
| 10.29 | 538086.34     | 0.05       | 858265.49     | 0.02   | 227.07    | BB | No        |
| 10.35 | 691780.49     | 0.04       | 1025556.68    | 0.02   | 291.93    | BB | No        |
| 10.79 | 911812.35     | 0.10       | 2312454.98    | 0.05   | 384.78    | BB | No        |
| 11.03 | 1054498022.70 | 0.30       | 1653093272.69 | 35.58  | 444993.38 | BB | No        |
| 11.92 | 720292.42     | 0.05       | 1199282.76    | 0.03   | 303.96    | BB | No        |
| 15.19 | 507814.10     | 0.08       | 1349664.03    | 0.03   | 214.30    | BB | No        |
| 15.88 | 3339590.51    | 0.14       | 9914307.00    | 0.21   | 1409.29   | BB | No        |
| 16.40 | 504976.66     | 0.17       | 1699663.53    | 0.04   | 213.10    | BB | No        |

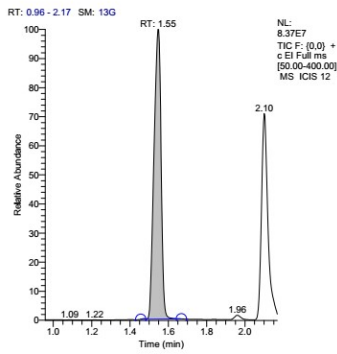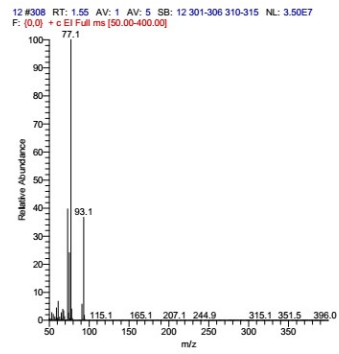



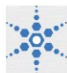

# ChemLab Technologies - GC/MS Report

| RT   | SI  | RSI | Probability | Library   | Molecular Formula | Molecular Weight |
|------|-----|-----|-------------|-----------|-------------------|------------------|
| 1.55 | 610 | 615 | 46.35       | mainlib   | C5H6F2O2          | 136              |
| 1.55 | 587 | 675 | 16.92       | mainlib   | C8H12             | 108              |
| 1.55 | 521 | 550 | 2.67        | mainlib   | C6H9NSi           | 123              |
| 1.55 | 520 | 620 | 2.56        | nist_msms | C7H8O2            | 124              |
| 1.55 | 519 | 529 | 2.46        | mainlib   | C7H9Br            | 172              |

## Hit Spectrum

## Delta

## Compound Structure

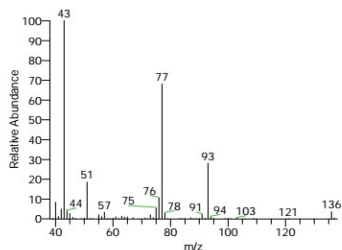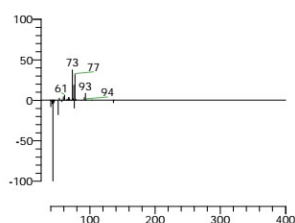

2-Propen-1-ol, 3,3-difluoro-, acetate  
Formula C5H6F2O2, MW 136, CAS# 159740-6, Entry# 8836  
3,3-Difluoro-2-propenyl acetate #

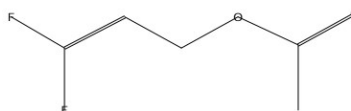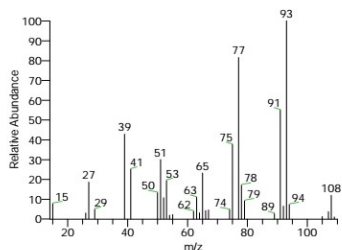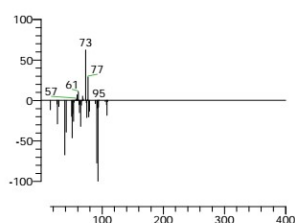

1-Hexen-3-yne, 5,5-dimethyl-  
Formula C8H12, MW 108, CAS# 4911-58-4, Entry# 60086  
5,5-Dimethyl-1-hexen-3-yne #

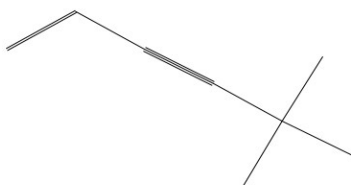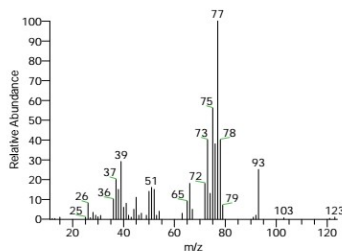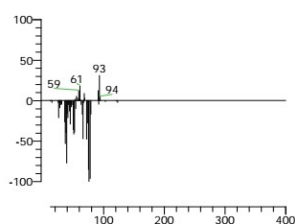

Silanamine, N-phenyl-  
Formula C6H9NSi, MW 123, CAS# 5578-85-8, Entry# 42604  
Silylamine, N-phenyl-

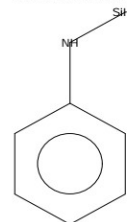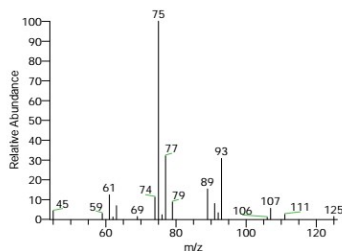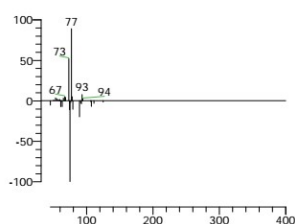

4-Methylcatechol  
Formula C7H8O2, MW 124, CAS# 452-86-8, Entry# 6249  
\$.06QqQ/triple quadrupole

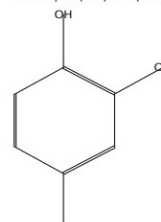



# ChemLab Technologies - GC/MS Report

Hit Spectrum

Delta

Compound Structure

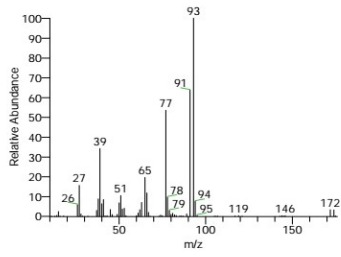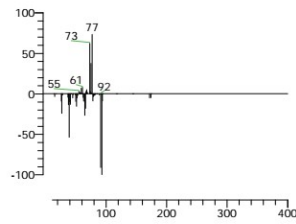

Nortriclyl bromide  
Formula C<sub>7</sub>H<sub>9</sub>Br, MW 172, CAS# NA, Entry# 60212

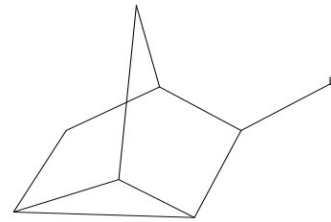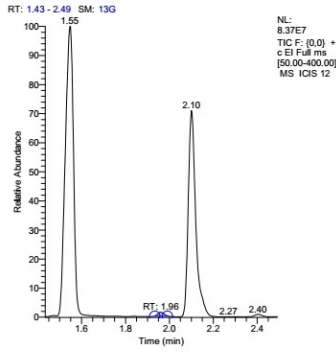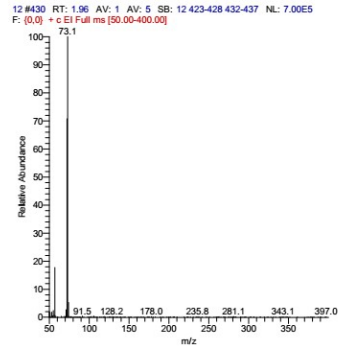

| RT          | SI  | RSI | Probability | Library   | Molecular Formula                                           | Molecular Weight |
|-------------|-----|-----|-------------|-----------|-------------------------------------------------------------|------------------|
| <u>1.96</u> | 836 | 945 | 41.93       | mainlib   | C <sub>4</sub> H <sub>7</sub> NO <sub>2</sub>               | 101              |
| 1.96        | 809 | 879 | 35.42       | replib    | C <sub>3</sub> H <sub>7</sub> NO                            | 73               |
| 1.96        | 832 | 935 | 35.42       | replib    | C <sub>3</sub> H <sub>7</sub> NO                            | 73               |
| 1.96        | 750 | 754 | 3.61        | replib    | C <sub>4</sub> H <sub>11</sub> BO <sub>2</sub>              | 102              |
| 1.96        | 739 | 773 | 2.47        | nist_msms | C <sub>4</sub> H <sub>8</sub> N <sub>2</sub> O <sub>3</sub> | 132              |

Hit Spectrum

Delta

Compound Structure

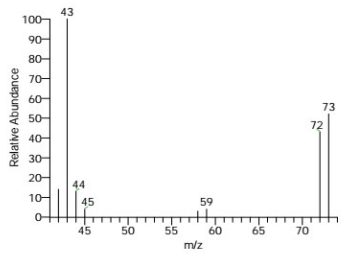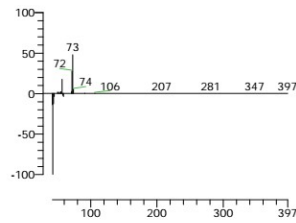

Acetamidoacetaldehyde  
Formula C<sub>4</sub>H<sub>7</sub>NO<sub>2</sub>, MW 101, CAS# 64790-08-5, Entry# 8695  
N-(2-Oxoethyl)acetamide #

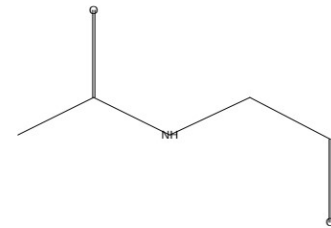

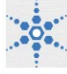

# ChemLab Technologies - GC/MS Report

Hit Spectrum

Delta

Compound Structure

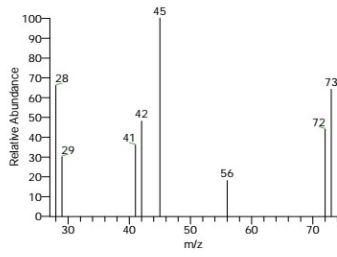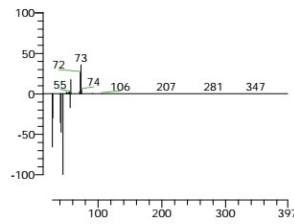

Isoxazolidine  
Formula C3H7NO, MW 73, CAS# 504-72-3, Entry# 3700  
Isoxazole, tetrahydro-

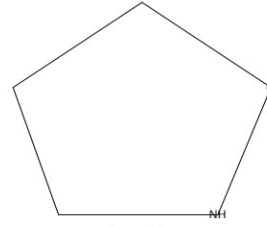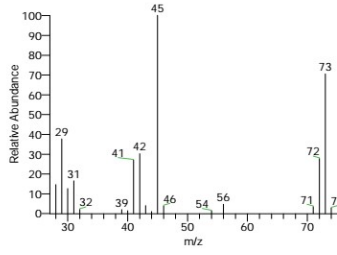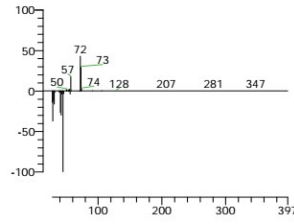

Isoxazolidine  
Formula C3H7NO, MW 73, CAS# 504-72-3, Entry# 3928  
Isoxazole, tetrahydro-

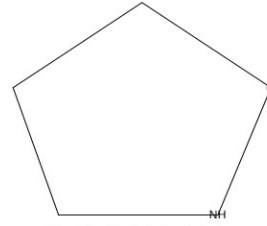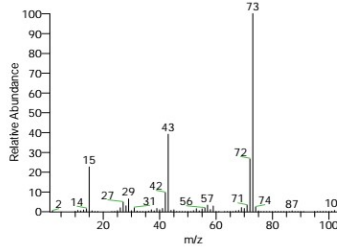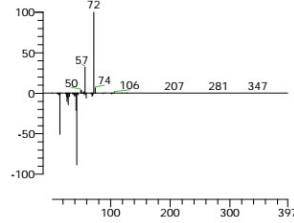

Boronic acid, ethyl-, dimethyl ester  
Formula C4H11BO2, MW 102, CAS# 7318-82-3, Entry# 8944  
Ethaneboronic acid, dimethyl ester

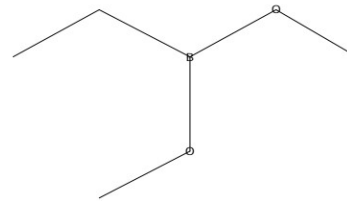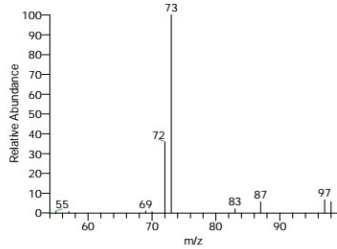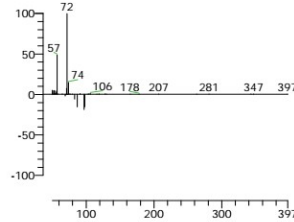

3-Ureidopropionic acid  
Formula C4H8N2O3, MW 132, CAS# 462-88-4, Entry# 12279  
\$.061/ton trap

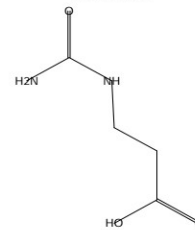

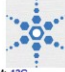

# ChemLab Technologies - GC/MS Report

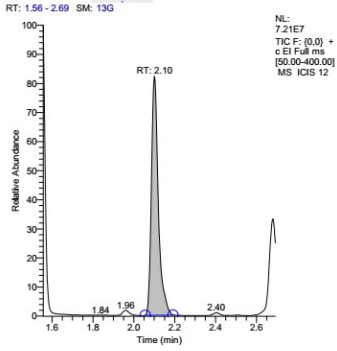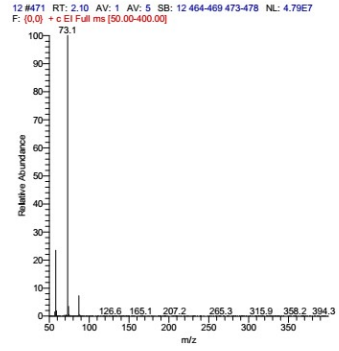

| RT   | SI  | RSI | Probability | Library   | Molecular Formula | Molecular Weight |
|------|-----|-----|-------------|-----------|-------------------|------------------|
| 2.10 | 937 | 937 | 70.40       | replib    | C4H8O2            | 88               |
| 2.10 | 938 | 942 | 70.40       | mainlib   | C4H8O2            | 88               |
| 2.10 | 884 | 927 | 13.79       | mainlib   | C3H7NO            | 73               |
| 2.10 | 871 | 987 | 8.90        | nist_msms | C4H9NO2           | 103              |
| 2.10 | 841 | 953 | 2.47        | nist_msms | C2H5NO3           | 91               |

## Hit Spectrum      Delta      Compound Structure

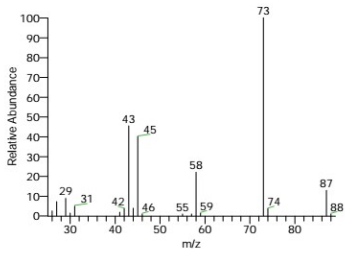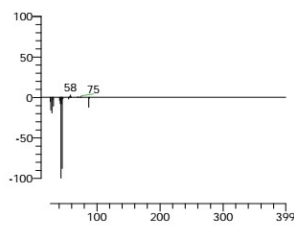

1,3-Dioxolane, 2-methyl-  
Formula C4H8O2, MW 88, CAS# 497-26-7, Entry# 36954  
2-Methyl-1,3-dioxolane

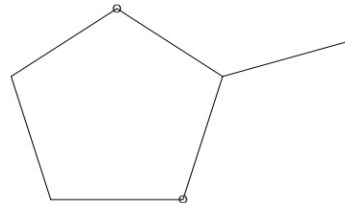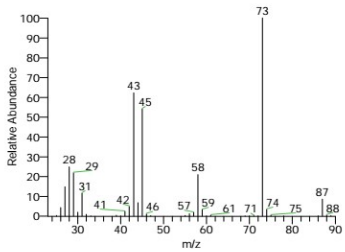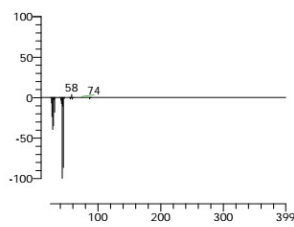

1,3-Dioxolane, 2-methyl-  
Formula C4H8O2, MW 88, CAS# 497-26-7, Entry# 8927  
2-Methyl-1,3-dioxolane

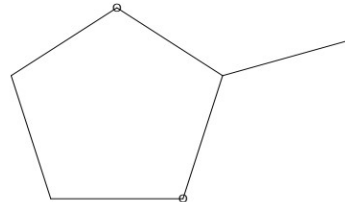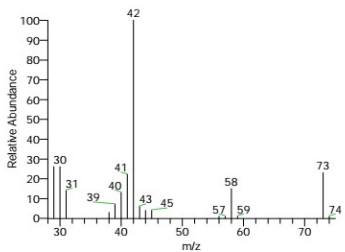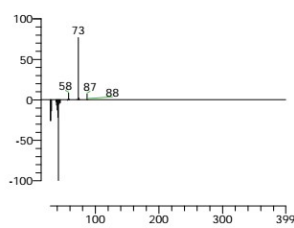

Acetaldehyde, O-methylxime  
Formula C3H7NO, MW 73, CAS# 33581-43-0, Entry# 4172  
(1E)-Ethanal o-methylxime #

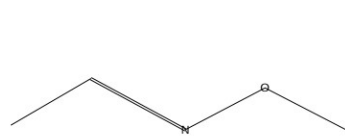



# ChemLab Technologies - GC/MS Report

Hit Spectrum

Delta

Compound Structure

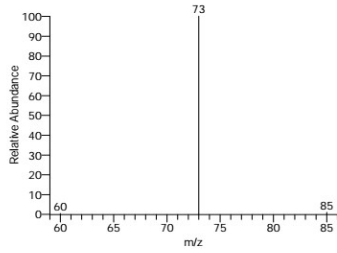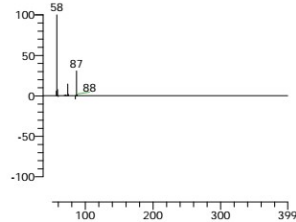

DL-3-Aminoisobutyric acid  
 Formula C<sub>4</sub>H<sub>9</sub>NO<sub>2</sub>, MW 103, CAS# 144-90-1, Entry# 12270  
 \$.0617/ion trap

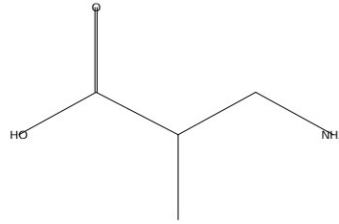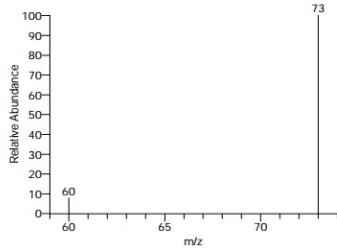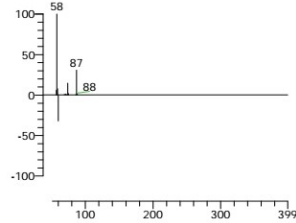

O-(Carboxymethyl)hydroxylamine  
 Formula C<sub>2</sub>H<sub>5</sub>NO<sub>3</sub>, MW 91, CAS# 645-88-5, Entry# 12333  
 \$.0617/ion trap

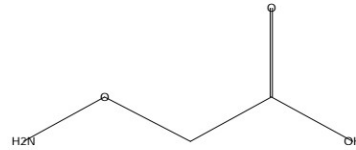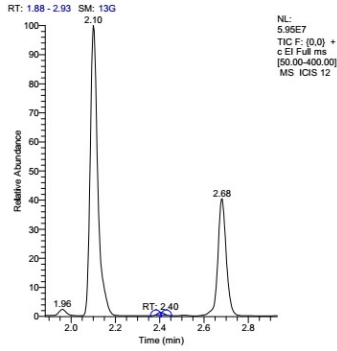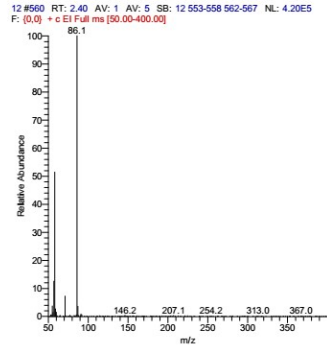

| RT   | SI  | RSI | Probability | Library   | Molecular Formula                                | Molecular Weight |
|------|-----|-----|-------------|-----------|--------------------------------------------------|------------------|
| 2.40 | 894 | 910 | 65.11       | replib    | C <sub>4</sub> H <sub>6</sub> O <sub>2</sub>     | 86               |
| 2.40 | 898 | 913 | 65.11       | mainlib   | C <sub>4</sub> H <sub>6</sub> O <sub>2</sub>     | 86               |
| 2.40 | 840 | 953 | 11.98       | nist_msms | C <sub>19</sub> H <sub>23</sub> N <sub>3</sub> O | 309              |
| 2.40 | 825 | 932 | 7.26        | nist_msms | C <sub>14</sub> H <sub>22</sub> N <sub>2</sub> O | 234              |
| 2.40 | 815 | 835 | 5.12        | replib    | C <sub>5</sub> H <sub>10</sub> O                 | 86               |



# ChemLab Technologies - GC/MS Report

Hit Spectrum

Delta

Compound Structure

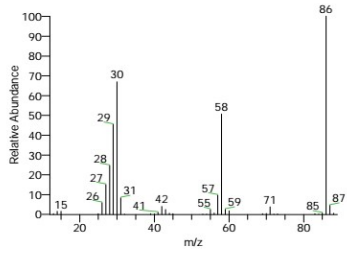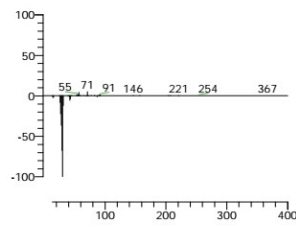

1,4-Dioxin, 2,3-dihydro-  
Formula C4H6O2, MW 86, CAS# 543-75-9, Entry# 50594  
p-Dioxin, 2,3-dihydro-

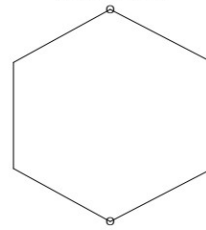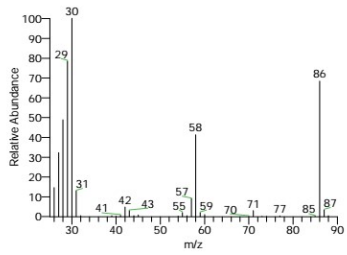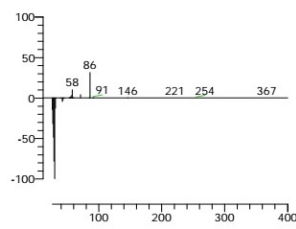

1,4-Dioxin, 2,3-dihydro-  
Formula C4H6O2, MW 86, CAS# 543-75-9, Entry# 331  
p-Dioxin, 2,3-dihydro-

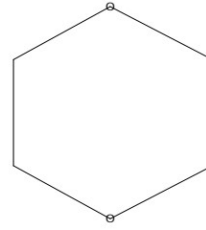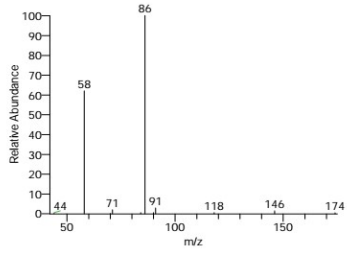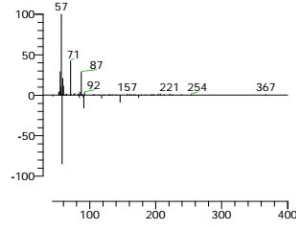

Formula C19H23N3O, MW 309, CAS# 642-72-8, Entry# 4967  
\$.06QqQ/triple quadrupole

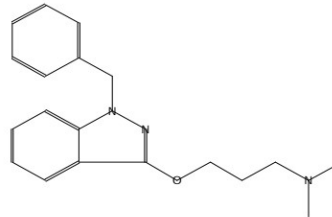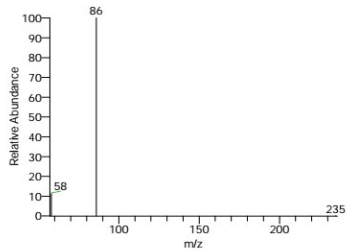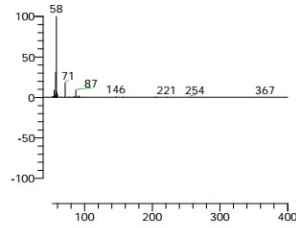

Lidocaine  
Formula C14H22N2O, MW 234, CAS# 137-58-6, Entry# 793  
\$.06QqQ/triple quadrupole

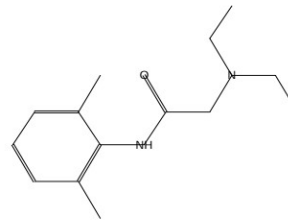



# ChemLab Technologies - GC/MS Report

Hit Spectrum

Delta

Compound Structure

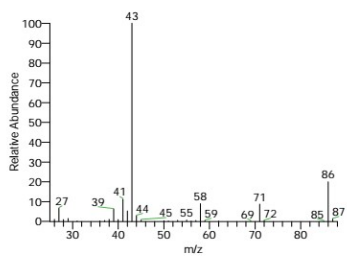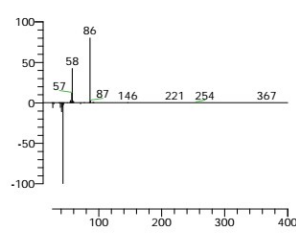

2-Pentanone  
Formula C<sub>5</sub>H<sub>10</sub>O, MW 86, CAS# 107-87-9, Entry# 2807  
Ethyl acetone

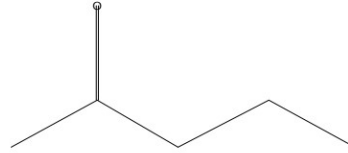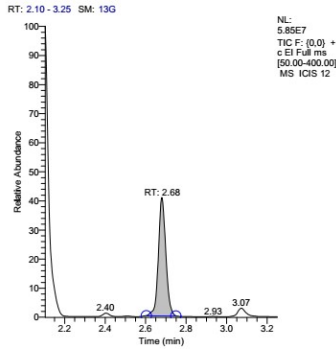

NL: 5.85E7  
TIC F: (0.0) +  
c EI Full.ms  
[50.00-400.00]  
MS ICIS 12

12 #642 RT: 2.68 AV: 1 AV: 5 SB: 12 635-640 644-649 NL: 1.06E7  
F: (0.0) + c EI Full.ms [50.00-400.00]

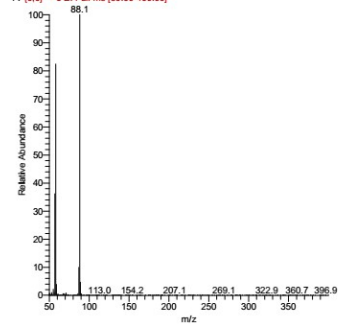

| RT   | SI  | RSI | Probability | Library | Molecular Formula                             | Molecular Weight |
|------|-----|-----|-------------|---------|-----------------------------------------------|------------------|
| 2.68 | 917 | 923 | 78.93       | replib  | C <sub>4</sub> H <sub>8</sub> O <sub>2</sub>  | 88               |
| 2.68 | 907 | 913 | 78.93       | replib  | C <sub>4</sub> H <sub>8</sub> O <sub>2</sub>  | 88               |
| 2.68 | 914 | 922 | 78.93       | replib  | C <sub>4</sub> H <sub>8</sub> O <sub>2</sub>  | 88               |
| 2.68 | 951 | 961 | 78.93       | mainlib | C <sub>4</sub> H <sub>8</sub> O <sub>2</sub>  | 88               |
| 2.68 | 916 | 934 | 19.81       | replib  | C <sub>5</sub> H <sub>10</sub> O <sub>3</sub> | 118              |

Hit Spectrum

Delta

Compound Structure

SI 951, RSI 961, mainlib, Entry# 236, CAS# 123-91-1, 1,4-Dioxane

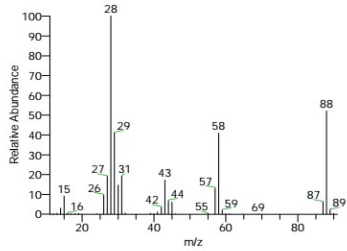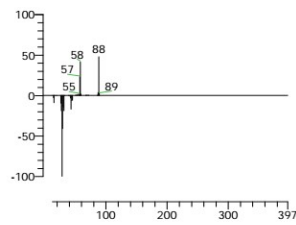

1,4-Dioxane  
Formula C<sub>4</sub>H<sub>8</sub>O<sub>2</sub>, MW 88, CAS# 123-91-1, Entry# 236  
p-Dioxane

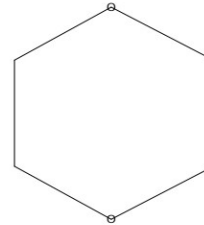



# ChemLab Technologies - GC/MS Report

| Hit Spectrum                                                                                                                                                                                                                                                          | Delta                                                                                                                                               | Compound Structure                                                                                                                           |
|-----------------------------------------------------------------------------------------------------------------------------------------------------------------------------------------------------------------------------------------------------------------------|-----------------------------------------------------------------------------------------------------------------------------------------------------|----------------------------------------------------------------------------------------------------------------------------------------------|
| <p>SI 917, RSI 923, replib, Entry# 98, CAS# 123-91-1, 1,4-Dioxane</p> <p>Mass spectrum showing relative abundance versus m/z. The base peak is at m/z 28. Other significant peaks are labeled at m/z 15, 19, 27, 29, 31, 43, 45, 57, 59, 69, 87, and 89.</p>          | <p>Delta spectrum showing relative abundance versus m/z. The base peak is at m/z 58. Other significant peaks are labeled at m/z 55, 57, and 89.</p> | <p>1,4-Dioxane<br/>Formula C<sub>4</sub>H<sub>8</sub>O<sub>2</sub>, MW 88, CAS# 123-91-1, Entry# 98<br/>p-Dioxane</p>                        |
| <p>Mass spectrum showing relative abundance versus m/z. The base peak is at m/z 28. Other significant peaks are labeled at m/z 26, 27, 31, 42, 43, 44, 45, 59, 73, 87, 89, and 118.</p>                                                                               | <p>Delta spectrum showing relative abundance versus m/z. The base peak is at m/z 58. Other significant peaks are labeled at m/z 55, 57, and 89.</p> | <p>1,3,6-Trioxocane<br/>Formula C<sub>5</sub>H<sub>10</sub>O<sub>3</sub>, MW 118, CAS# 1779-19-7, Entry# 94<br/>Diethylene glycol formal</p> |
| <p>SI 914, RSI 922, replib, Entry# 100, CAS# 123-91-1, 1,4-Dioxane</p> <p>Mass spectrum showing relative abundance versus m/z. The base peak is at m/z 28. Other significant peaks are labeled at m/z 15, 26, 27, 29, 31, 43, 45, 56, 57, 59, 61, 77, 87, and 89.</p> | <p>Delta spectrum showing relative abundance versus m/z. The base peak is at m/z 58. Other significant peaks are labeled at m/z 55, 57, and 89.</p> | <p>1,4-Dioxane<br/>Formula C<sub>4</sub>H<sub>8</sub>O<sub>2</sub>, MW 88, CAS# 123-91-1, Entry# 100<br/>p-Dioxane</p>                       |
| <p>SI 907, RSI 913, replib, Entry# 99, CAS# 123-91-1, 1,4-Dioxane</p> <p>Mass spectrum showing relative abundance versus m/z. The base peak is at m/z 28. Other significant peaks are labeled at m/z 29, 31, 32, 42, 43, 44, 56, 57, 59, 67, 71, 85, 87, and 89.</p>  | <p>Delta spectrum showing relative abundance versus m/z. The base peak is at m/z 58. Other significant peaks are labeled at m/z 55, 57, and 89.</p> | <p>1,4-Dioxane<br/>Formula C<sub>4</sub>H<sub>8</sub>O<sub>2</sub>, MW 88, CAS# 123-91-1, Entry# 99<br/>p-Dioxane</p>                        |





# ChemLab Technologies - GC/MS Report

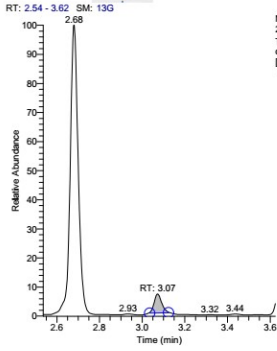

NL: 2.41E7  
TIC F: (0.0) +  
c EI Full ms  
(50.00-400.00)  
MS ICS 12

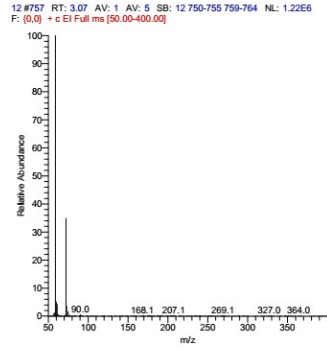

| RT   | SI  | RSI | Probability | Library  | Molecular Formula | Molecular Weight |
|------|-----|-----|-------------|----------|-------------------|------------------|
| 3.07 | 923 | 923 | 95.07       | NISTDEMO | C4H10O2           | 90               |
| 3.07 | 923 | 923 | 95.07       | mainlib  | C4H10O2           | 90               |
| 3.07 | 914 | 926 | 95.07       | replib   | C4H10O2           | 90               |
| 3.07 | 929 | 929 | 95.07       | replib   | C4H10O2           | 90               |
| 3.07 | 744 | 775 | 1.52        | replib   | C4H9NO            | 87               |

## Hit Spectrum

## Delta

## Compound Structure

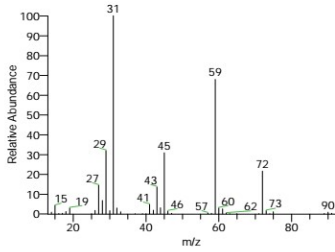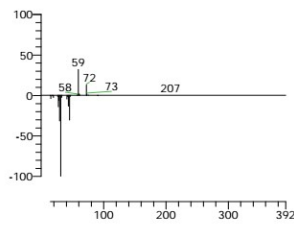

Ethanol, 2-ethoxy-  
Formula C4H10O2, MW 90, CAS# 110-80-5, Entry# 614  
 $\alpha$ -Ethoxyethanol

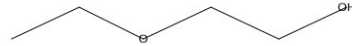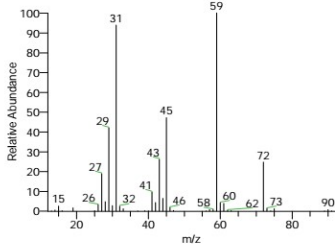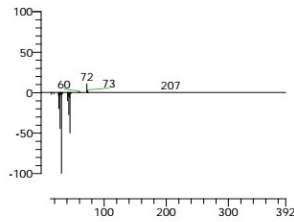

Ethanol, 2-ethoxy-  
Formula C4H10O2, MW 90, CAS# 110-80-5, Entry# 1992  
 $\alpha$ -Ethoxyethanol

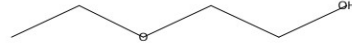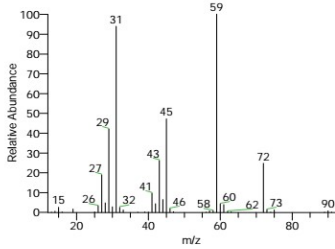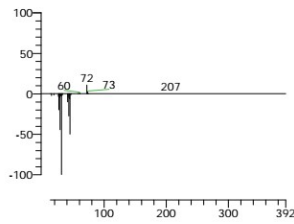

Ethanol, 2-ethoxy-  
Formula C4H10O2, MW 90, CAS# 110-80-5, Entry# 27147  
 $\alpha$ -Ethoxyethanol

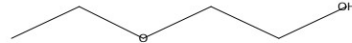



# ChemLab Technologies - GC/MS Report

Hit Spectrum

Delta

Compound Structure

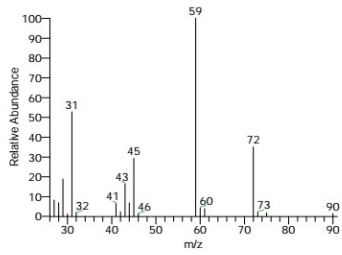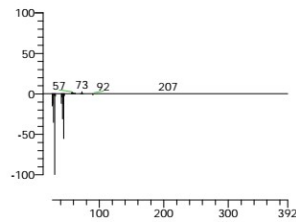

Ethanol, 2-ethoxy-  
Formula C<sub>4</sub>H<sub>10</sub>O<sub>2</sub>, MW 90, CAS# 110-80-5, Entry# 6834  
 $\alpha$ -Ethoxyethanol

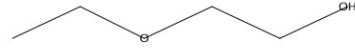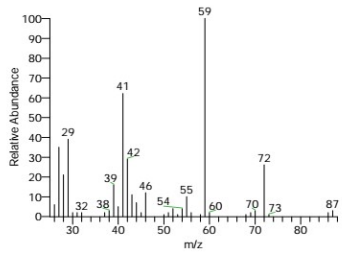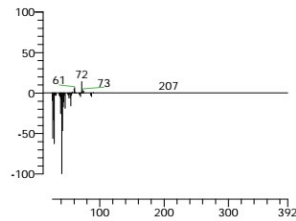

Butanal, oxime  
Formula C<sub>4</sub>H<sub>9</sub>NO, MW 87, CAS# 110-69-0, Entry# 6841  
Butyraldehyde, oxime

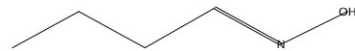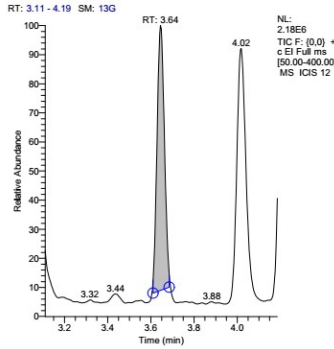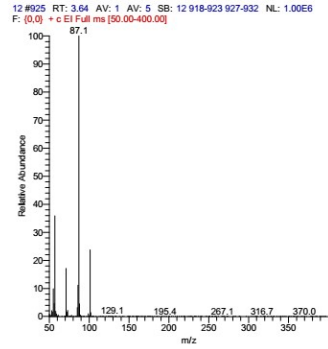

| RT   | SI  | RSI | Probability | Library | Molecular Formula                             | Molecular Weight |
|------|-----|-----|-------------|---------|-----------------------------------------------|------------------|
| 3.64 | 888 | 892 | 95.06       | mainlib | C <sub>6</sub> H <sub>12</sub> O <sub>2</sub> | 116              |
| 3.64 | 697 | 795 | 2.85        | replib  | C <sub>5</sub> H <sub>10</sub> O <sub>2</sub> | 102              |
| 3.64 | 683 | 716 | 2.85        | replib  | C <sub>5</sub> H <sub>10</sub> O <sub>2</sub> | 102              |
| 3.64 | 743 | 809 | 2.85        | mainlib | C <sub>5</sub> H <sub>10</sub> O <sub>2</sub> | 102              |
| 3.64 | 685 | 693 | 0.52        | mainlib | C <sub>8</sub> H <sub>18</sub> O              | 130              |



# ChemLab Technologies - GC/MS Report

Hit Spectrum

Delta

Compound Structure

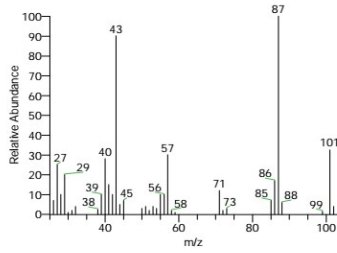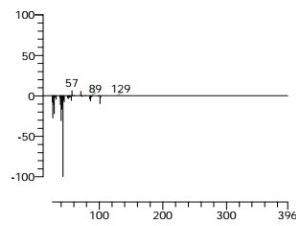

1,3-Dioxolane, 2-ethyl-2-methyl-  
Formula C<sub>6</sub>H<sub>12</sub>O<sub>2</sub>, MW 116, CAS# 126-39-6, Entry# 51953  
2-Butanone, cyclic ethylene acetal

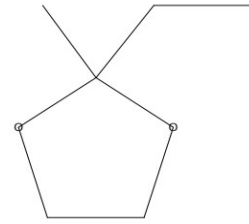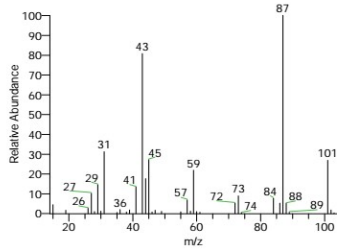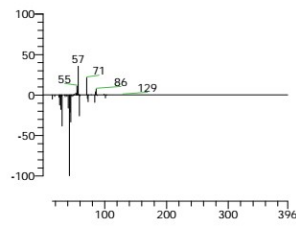

1,3-Dioxane, 2-methyl-  
Formula C<sub>5</sub>H<sub>10</sub>O<sub>2</sub>, MW 102, CAS# 626-68-6, Entry# 51873  
m-Dioxane, 2-methyl-

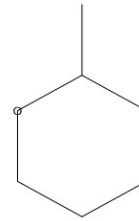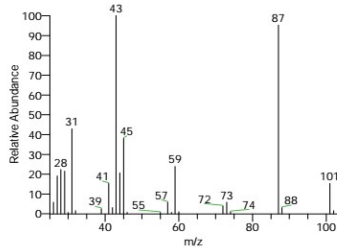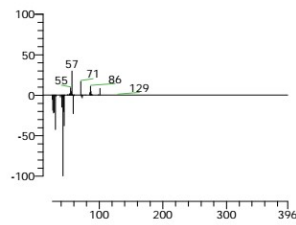

1,3-Dioxane, 2-methyl-  
Formula C<sub>5</sub>H<sub>10</sub>O<sub>2</sub>, MW 102, CAS# 626-68-6, Entry# 2821  
m-Dioxane, 2-methyl-

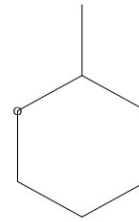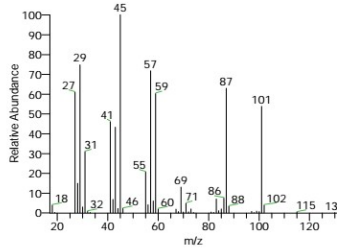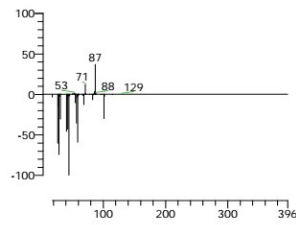

3-Pentanol, 3-ethyl-2-methyl-  
Formula C<sub>8</sub>H<sub>18</sub>O, MW 130, CAS# 597-05-7, Entry# 15658  
2-Methyl-3-ethyl-3-pentanol

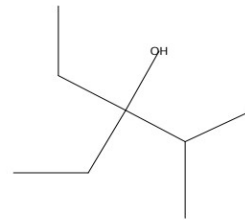



# ChemLab Technologies - GC/MS Report

Hit Spectrum

Delta

Compound Structure

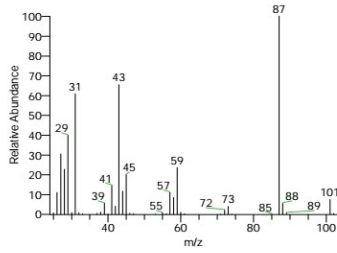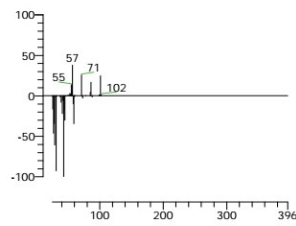

1,3-Dioxane, 2-methyl-  
Formula C5H10O2, MW 102, CAS# 626-68-6, Entry# 11810  
m-Dioxane, 2-methyl-

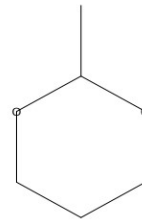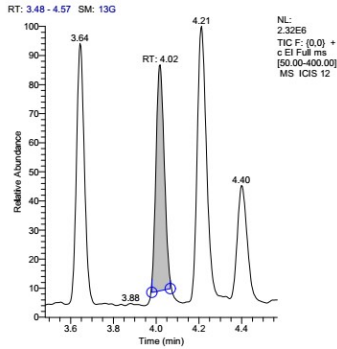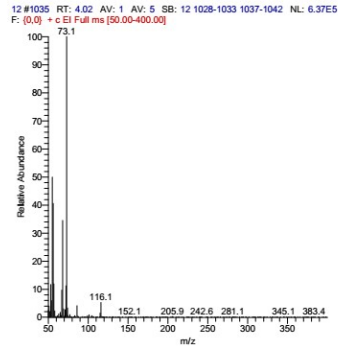

| RT   | SI  | RSI | Probability | Library | Molecular Formula | Molecular Weight |
|------|-----|-----|-------------|---------|-------------------|------------------|
| 4.02 | 708 | 762 | 16.99       | replib  | C4H11N            | 73               |
| 4.02 | 688 | 779 | 7.74        | replib  | C7H16O            | 116              |
| 4.02 | 688 | 825 | 7.74        | mainlib | C8H16O            | 128              |
| 4.02 | 682 | 708 | 6.08        | replib  | C7H14O            | 114              |
| 4.02 | 680 | 748 | 5.61        | replib  | C5H12O2           | 104              |

Hit Spectrum

Delta

Compound Structure

SI 708, RSI 762, replib, Entry# 468, CAS# 78-81-9, Isobutylamine

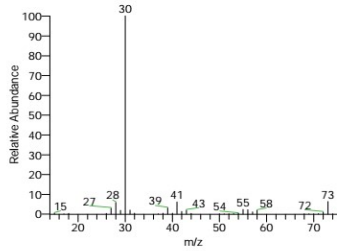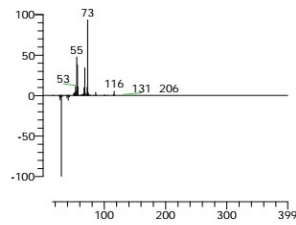

Isobutylamine  
Formula C4H11N, MW 73, CAS# 78-81-9, Entry# 468  
1-Propanamine, 2-methyl-

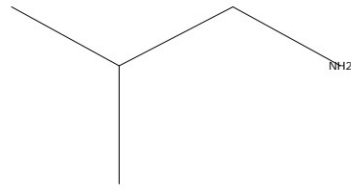



# ChemLab Technologies - GC/MS Report

Hit Spectrum

Delta

Compound Structure

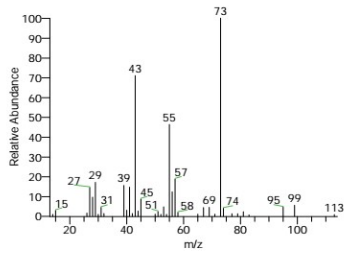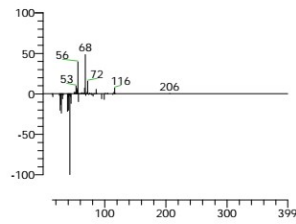

3,5-Dimethyl-5-hexen-3-ol  
Formula C<sub>8</sub>H<sub>16</sub>O, MW 128, CAS# 1569-46-6, Entry# 36970

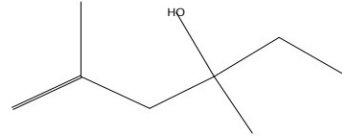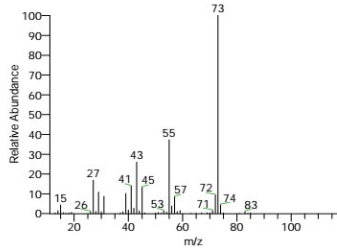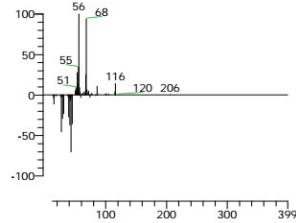

3-Pentanol, 2,4-dimethyl-  
Disopropylcarbinol  
Formula C<sub>7</sub>H<sub>16</sub>O, MW 116, CAS# 600-36-2, Entry# 9003

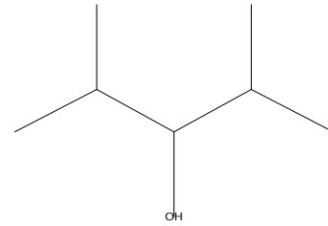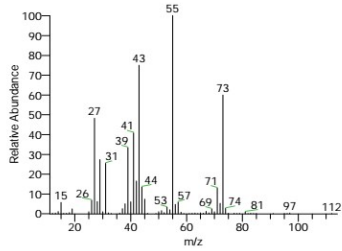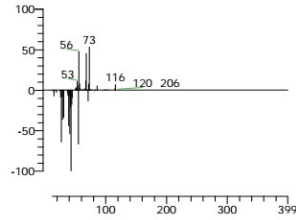

1-Hepten-4-ol  
Formula C<sub>7</sub>H<sub>14</sub>O, MW 114, CAS# 3521-91-3, Entry# 4621

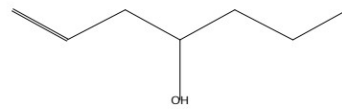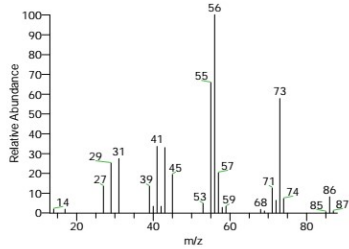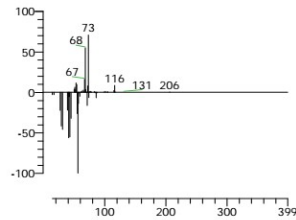

Neopentyl glycol  
Formula C<sub>5</sub>H<sub>12</sub>O<sub>2</sub>, MW 104, CAS# 126-30-7, Entry# 5227  
1,3-Propanediol, 2,2-dimethyl-

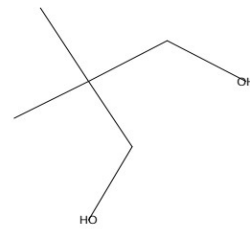



# ChemLab Technologies - GC/MS Report

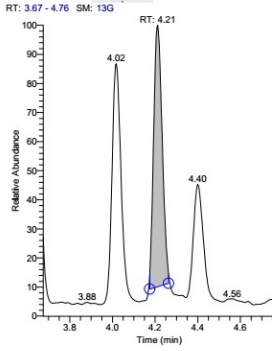

NL: 2.32E6  
TIC F: (0.0) +  
c EI Full ms  
(50.00-400.00)  
MS ICS 12

12 #1092 RT: 4.21 AV: 1 AV: 5 SB: 12 1085-1090 1094-1099 NL: 8.89E5  
F: (0.0) + c EI Full ms (50.00-400.00)

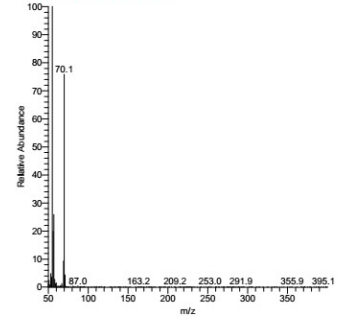

| RT   | SI  | RSI | Probability | Library  | Molecular Formula | Molecular Weight |
|------|-----|-----|-------------|----------|-------------------|------------------|
| 4.21 | 948 | 952 | 71.77       | mainlib  | C5H12O            | 88               |
| 4.21 | 942 | 949 | 71.77       | replib   | C5H12O            | 88               |
| 4.21 | 913 | 961 | 71.77       | replib   | C5H12O            | 88               |
| 4.21 | 890 | 908 | 71.77       | replib   | C5H12O            | 88               |
| 4.21 | 948 | 952 | 71.77       | NISTDEMO | C5H12O            | 88               |

## Hit Spectrum

## Delta

## Compound Structure

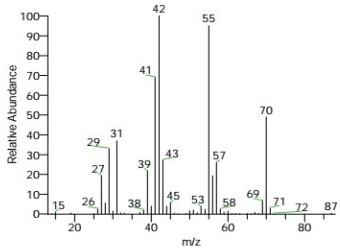

SI 948, RSI 952, mainlib, Entry# 4447, CAS# 71-41-0, 1-Pentanol

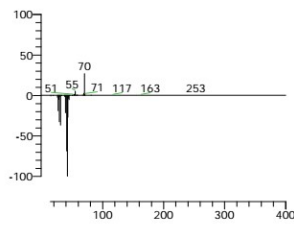

1-Pentanol  
Formula C5H12O, MW 88, CAS# 71-41-0, Entry# 2234  
Pentyl alcohol

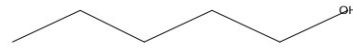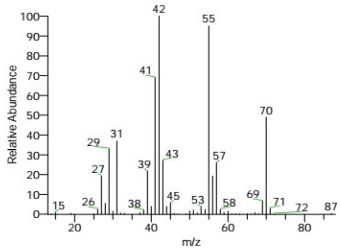

SI 942, RSI 949, replib, Entry# 1443, CAS# 71-41-0, 1-Pentanol

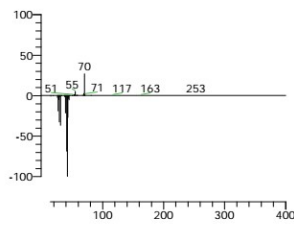

1-Pentanol  
Formula C5H12O, MW 88, CAS# 71-41-0, Entry# 4447  
Pentyl alcohol

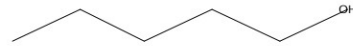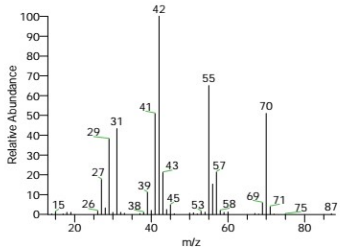

SI 942, RSI 949, replib, Entry# 1443, CAS# 71-41-0, 1-Pentanol

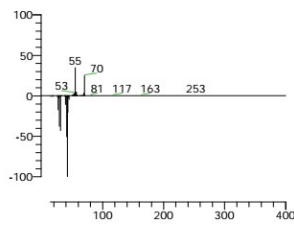

1-Pentanol  
Formula C5H12O, MW 88, CAS# 71-41-0, Entry# 1443  
Pentyl alcohol

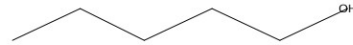



# ChemLab Technologies - GC/MS Report

SI 913, RSI 961, replib, Entry# 1438, CAS# 71-41-0, 1-Pentanol Delta Compound Structure

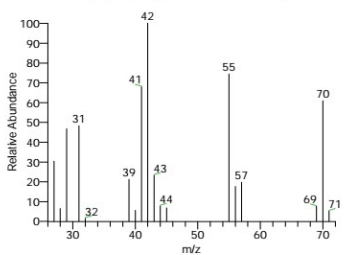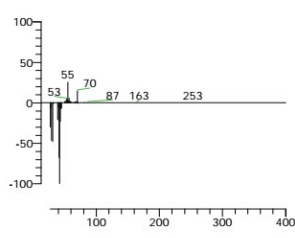

1-Pentanol  
Formula C5H12O, MW 88, CAS# 71-41-0, Entry# 1438  
Pentyl alcohol

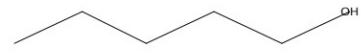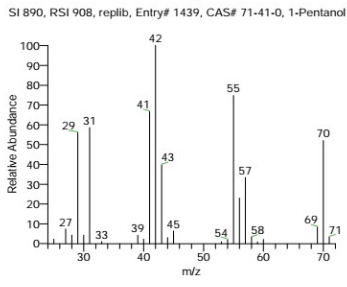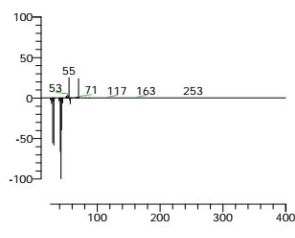

1-Pentanol  
Formula C5H12O, MW 88, CAS# 71-41-0, Entry# 1439  
Pentyl alcohol

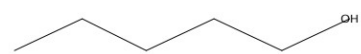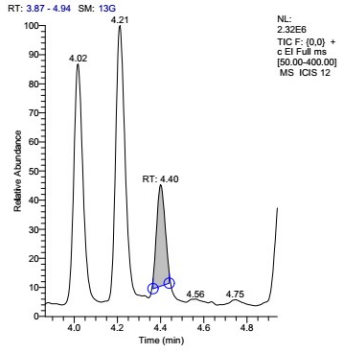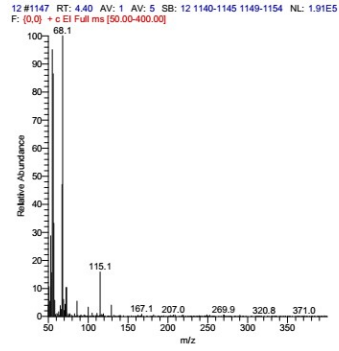

| RT   | SI  | RSI | Probability | Library | Molecular Formula | Molecular Weight |
|------|-----|-----|-------------|---------|-------------------|------------------|
| 4.40 | 780 | 878 | 32.95       | mainlib | C5H10O            | 86               |
| 4.40 | 779 | 878 | 31.67       | mainlib | C5H10O            | 86               |
| 4.40 | 770 | 866 | 22.99       | mainlib | C5H10O            | 86               |
| 4.40 | 728 | 808 | 6.89        | replib  | C5H10O            | 86               |
| 4.40 | 744 | 848 | 6.89        | replib  | C5H10O            | 86               |



# ChemLab Technologies - GC/MS Report

Hit Spectrum

Delta

Compound Structure

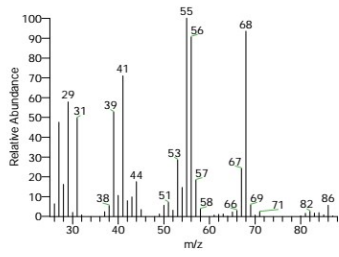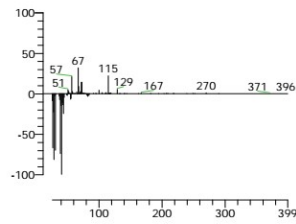

3-Penten-1-ol, (Z)-  
Formula C<sub>5</sub>H<sub>10</sub>O, MW 86, CAS# 764-38-5, Entry# 18745  
(3Z)-3-Penten-1-ol #

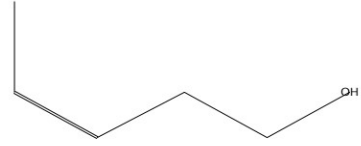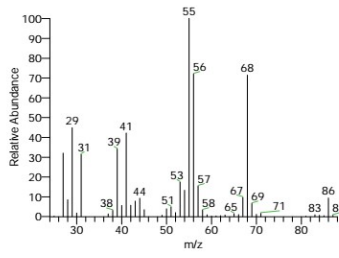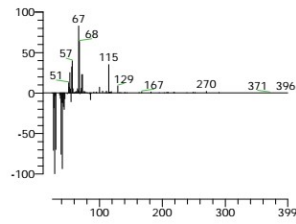

3-Penten-1-ol  
Formula C<sub>5</sub>H<sub>10</sub>O, MW 86, CAS# 39161-19-8, Entry# 18574  
3-Pentenol

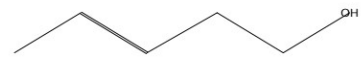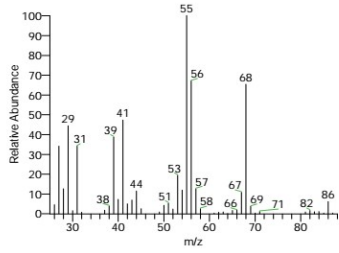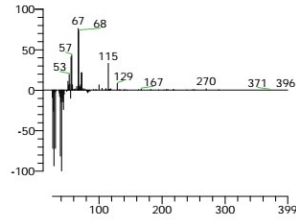

3-Penten-1-ol, (E)-  
Formula C<sub>5</sub>H<sub>10</sub>O, MW 86, CAS# 374-37-4, Entry# 18575  
trans-3-Pentenol-1

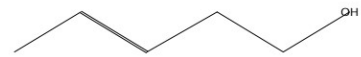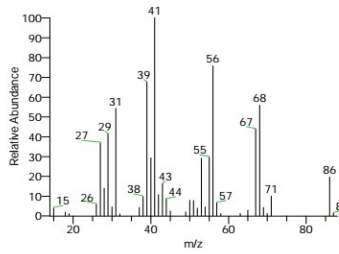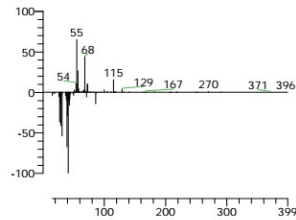

3-Buten-1-ol, 3-methyl-  
Formula C<sub>5</sub>H<sub>10</sub>O, MW 86, CAS# 763-32-6, Entry# 1009  
Isobutenylcarbinol

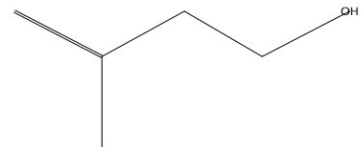





# ChemLab Technologies - GC/MS Report

Hit Spectrum

Delta

Compound Structure

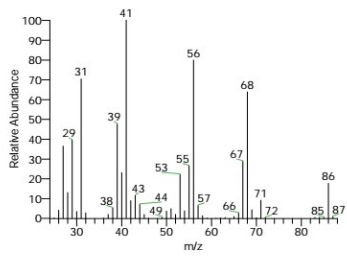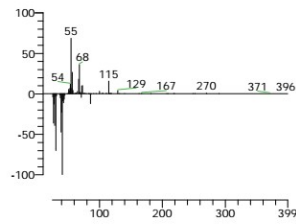

3-Buten-1-ol, 3-methyl-  
Formula C5H10O, MW 86, CAS# 763-32-6, Entry# 1001  
Isobutenylcarbinol

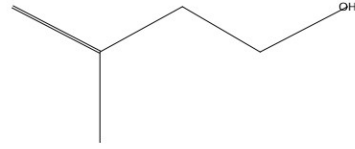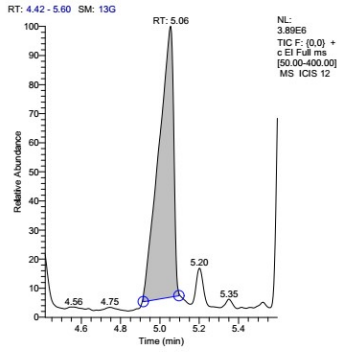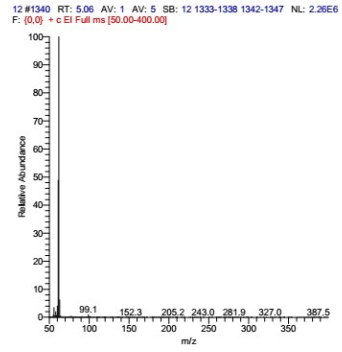

| RT   | SI  | RSI | Probability | Library   | Molecular Formula | Molecular Weight |
|------|-----|-----|-------------|-----------|-------------------|------------------|
| 5.06 | 914 | 999 | 47.86       | nist_msms | KNO3              | 101              |
| 5.06 | 914 | 999 | 47.86       | nist_msms | NNaO3             | 85               |
| 5.06 | 797 | 831 | 2.72        | replib    | C2H6S             | 62               |
| 5.06 | 763 | 805 | 0.99        | replib    | C2H6O2            | 62               |
| 5.06 | 774 | 800 | 0.99        | replib    | C2H6O2            | 62               |

Hit Spectrum

Delta

Compound Structure

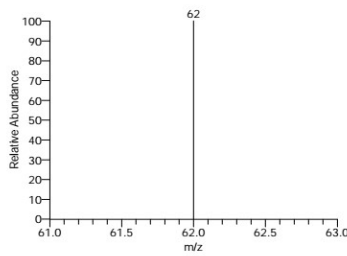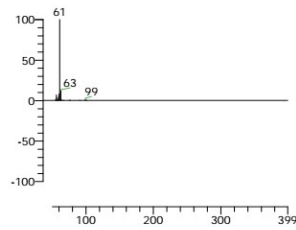

Sodium nitrate  
Formula NNaO3, MW 85, CAS# 7631-99-4, Entry# 2074  
\$.0617 Ion trap

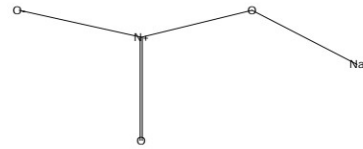



# ChemLab Technologies - GC/MS Report

Hit Spectrum

Delta

Compound Structure

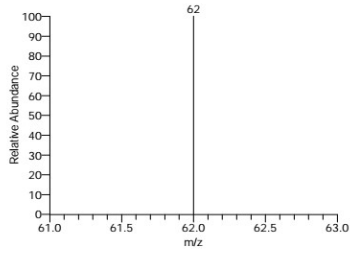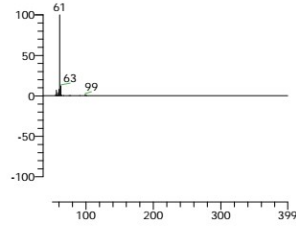

Potassium nitrate  
Formula  $\text{KNO}_3$ , MW 101, CAS# 7757-79-1, Entry# 2079  
\$.0617/ion trap

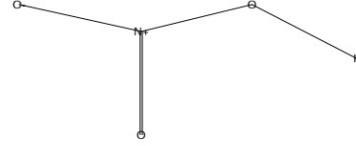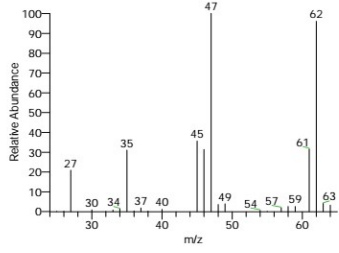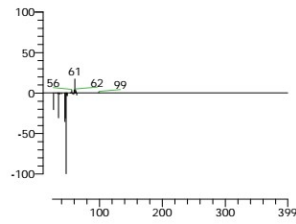

Dimethyl sulfide  
Formula  $\text{C}_2\text{H}_6\text{S}$ , MW 62, CAS# 75-18-3, Entry# 4066  
Methane, thiois-

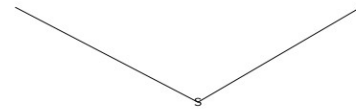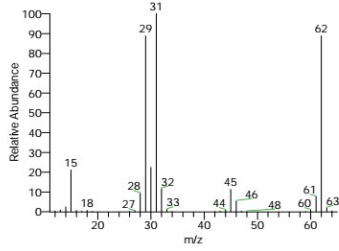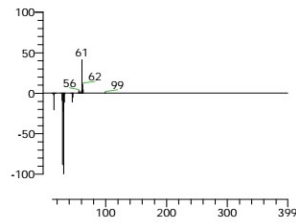

Peroxide, dimethyl  
Formula  $\text{C}_2\text{H}_6\text{O}_2$ , MW 62, CAS# 690-02-8, Entry# 578  
Methyl peroxide

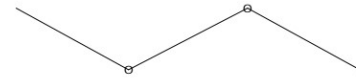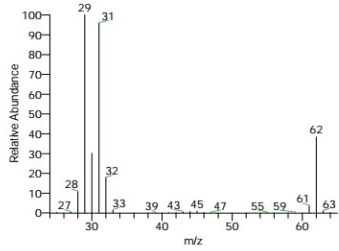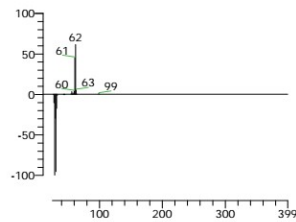

Peroxide, dimethyl  
Formula  $\text{C}_2\text{H}_6\text{O}_2$ , MW 62, CAS# 690-02-8, Entry# 159  
Methyl peroxide

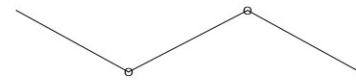

# ChemLab Technologies - GC/MS Report

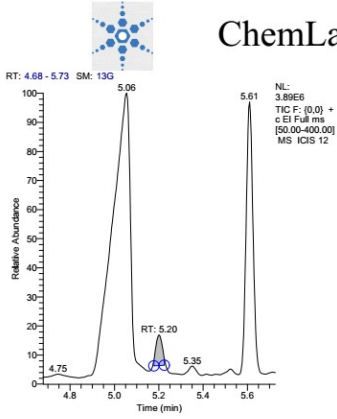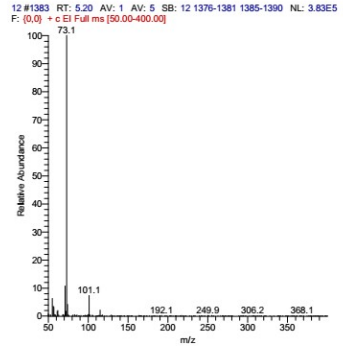

| RT   | SI  | RSI | Probability | Library | Molecular Formula | Molecular Weight |
|------|-----|-----|-------------|---------|-------------------|------------------|
| 5.20 | 811 | 860 | 55.23       | mainlib | C6H12O2           | 116              |
| 5.20 | 843 | 893 | 55.23       | replib  | C6H12O2           | 116              |
| 5.20 | 799 | 889 | 11.97       | mainlib | C6H12O2           | 116              |
| 5.20 | 792 | 945 | 9.17        | replib  | C3H6O2            | 74               |
| 5.20 | 776 | 859 | 5.28        | mainlib | C5H8O3            | 116              |

| Hit Spectrum | Delta | Compound Structure                                                                                                                   |
|--------------|-------|--------------------------------------------------------------------------------------------------------------------------------------|
|              |       | <p>1,3-Dioxolane, 2-(1-methylethyl)-<br/>Formula C6H12O2, MW 116, CAS# 822-83-3, Entry# 8924<br/>1,3-Dioxolane, 2-isopropyl-</p>     |
|              |       | <p>1,3-Dioxolane, 2-(1-methylethyl)-<br/>Formula C6H12O2, MW 116, CAS# 822-83-3, Entry# 37058<br/>1,3-Dioxolane, 2-isopropyl-</p>    |
|              |       | <p>1,3-Dioxolane, 2-propyl-<br/>Formula C6H12O2, MW 116, CAS# 3390-13-4, Entry# 37065<br/>Butanal, cyclic 1,2-ethanediyyl acetal</p> |



# ChemLab Technologies - GC/MS Report

Hit Spectrum

Delta

Compound Structure

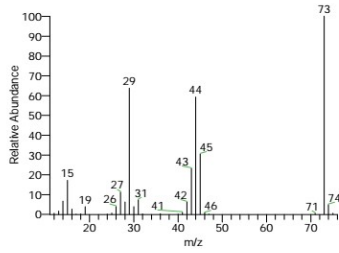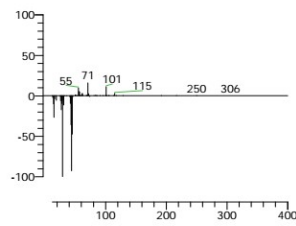

1,3-Dioxolane  
Formula C3H6O2, MW 74, CAS# 646-06-0, Entry# 8899  
Ethylene glycol formal

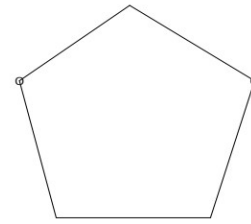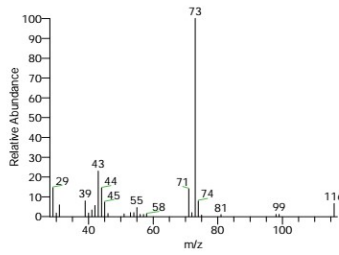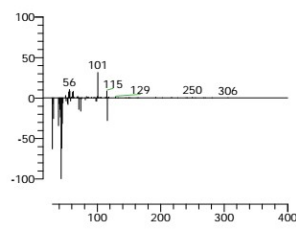

d-Arabinol  
Formula C5H8O3, MW 116, CAS# 496-61-7, Entry# 36940

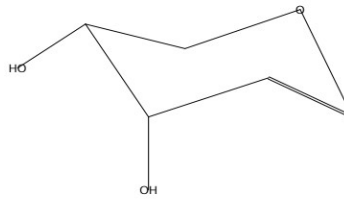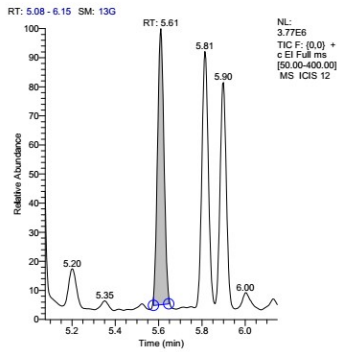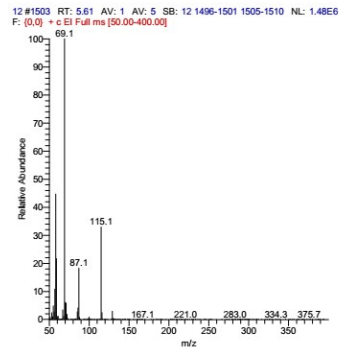

| RT   | SI  | RSI | Probability | Library | Molecular Formula | Molecular Weight |
|------|-----|-----|-------------|---------|-------------------|------------------|
| 5.61 | 702 | 716 | 24.84       | mainlib | C9H16O3           | 172              |
| 5.61 | 674 | 678 | 17.54       | replib  | C8H16O3           | 160              |
| 5.61 | 692 | 711 | 17.54       | replib  | C8H16O3           | 160              |
| 5.61 | 688 | 700 | 14.82       | mainlib | C9H16O3           | 172              |
| 5.61 | 682 | 684 | 11.64       | mainlib | C12H22O3          | 214              |



# ChemLab Technologies - GC/MS Report

Hit Spectrum

Delta

Compound Structure

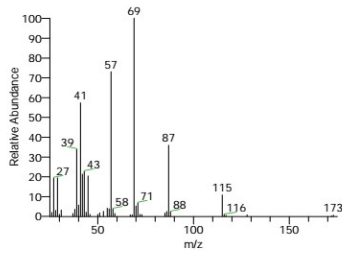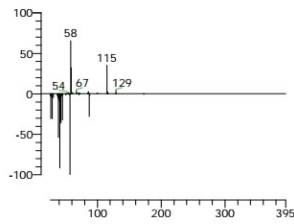

1,3-Dioxan-4-one, 2-(1,1-dimethylethyl)-6-methyl-  
Formula C<sub>9</sub>H<sub>16</sub>O<sub>3</sub>, MW 172, CAS# 113505-75-2, Entry# 32217  
2-tert-Butyl-6-methyl-1,3-dioxan-4-one #

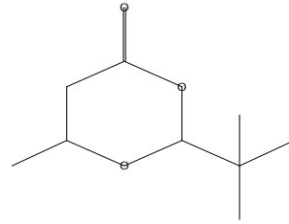

Furan, 2,5-diethoxytetrahydro-  
Formula C<sub>8</sub>H<sub>16</sub>O<sub>3</sub>, MW 160, CAS# 3320-90-9, Entry# 6616  
2,5-Diethoxytetrahydrofuran

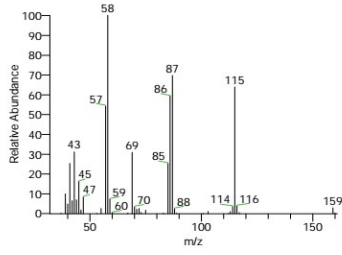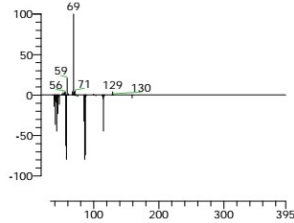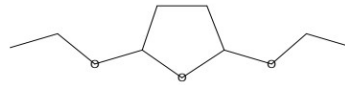

1,3-Dioxan-4-one, 2-(1,1-dimethylethyl)-5-methyl-, (2s-cis)-  
Formula C<sub>9</sub>H<sub>16</sub>O<sub>3</sub>, MW 172, CAS# 107289-32-7, Entry# 23371  
2-tert-Butyl-5-methyl-1,3-dioxan-4-one #

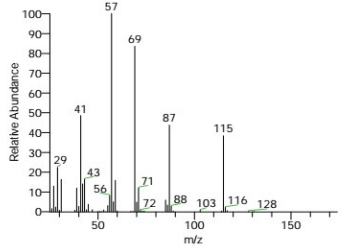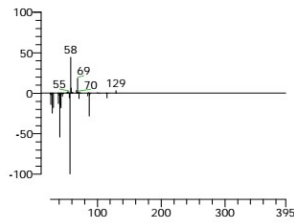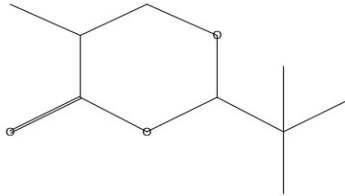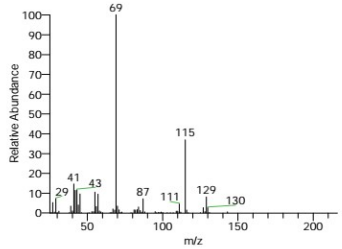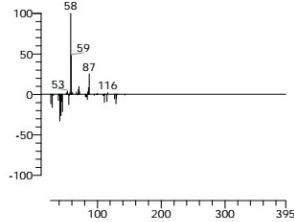

1,3-Dioxan-4-one, 2-heptyl-6-methyl  
Formula C<sub>12</sub>H<sub>22</sub>O<sub>3</sub>, MW 214, CAS# 95902-24-6, Entry# 33005  
2-Heptyl-6-methyl-1,3-dioxan-4-one #

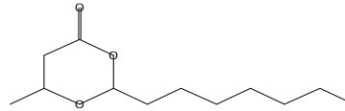



# ChemLab Technologies - GC/MS Report

Hit Spectrum

Delta

Compound Structure

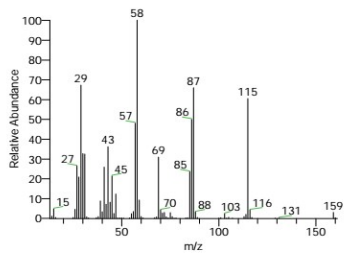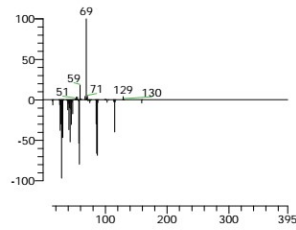

Furan, 2,5-diethoxytetrahydro-  
Formula C<sub>8</sub>H<sub>16</sub>O<sub>3</sub>, MW 160, CAS# 3320-90-9, Entry# 6327  
2,5-Diethoxytetrahydrofuran

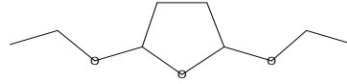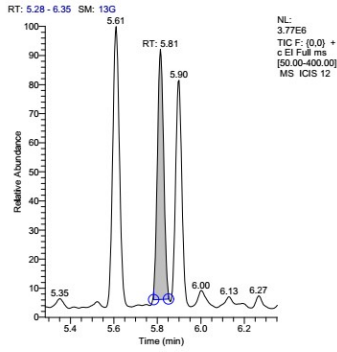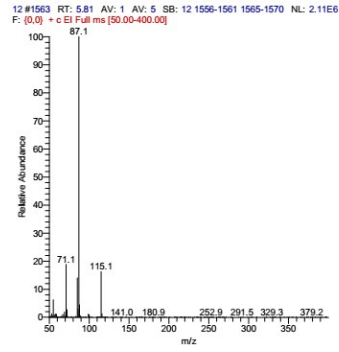

| RT   | SI  | RSI | Probability | Library   | Molecular Formula                             | Molecular Weight |
|------|-----|-----|-------------|-----------|-----------------------------------------------|------------------|
| 5.81 | 787 | 849 | 32.44       | mainlib   | C <sub>7</sub> H <sub>14</sub> O <sub>2</sub> | 130              |
| 5.81 | 766 | 789 | 13.80       | mainlib   | C <sub>7</sub> H <sub>14</sub> O <sub>2</sub> | 130              |
| 5.81 | 763 | 769 | 12.19       | replib    | C <sub>8</sub> H <sub>18</sub> O              | 130              |
| 5.81 | 753 | 960 | 8.61        | nist_msms | C <sub>4</sub> H <sub>4</sub> O <sub>5</sub>  | 132              |
| 5.81 | 743 | 745 | 6.07        | mainlib   | C <sub>8</sub> H <sub>18</sub> O              | 130              |

Hit Spectrum

Delta

Compound Structure

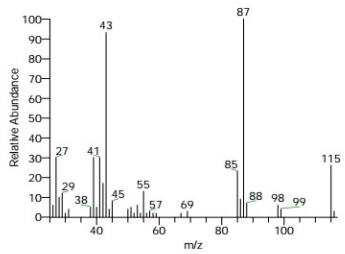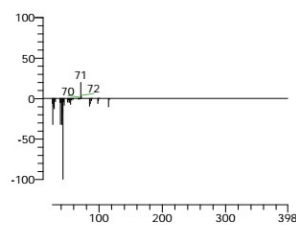

1,3-Dioxolane, 2-methyl-2-propyl-  
Formula C<sub>7</sub>H<sub>14</sub>O<sub>2</sub>, MW 130, CAS# 4352-98-1, Entry# 51871  
2-Pentanone, cyclic 1,2-ethanediyf acetal

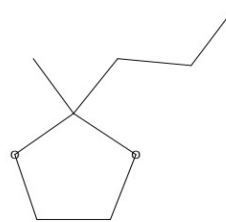



# ChemLab Technologies - GC/MS Report

Hit Spectrum

Delta

Compound Structure

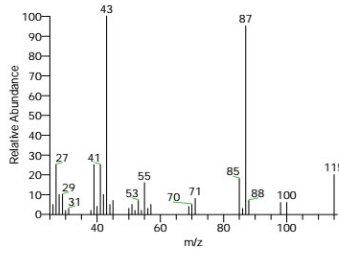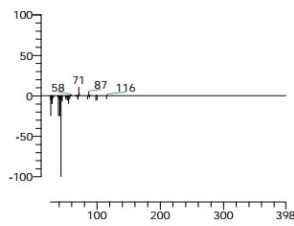

1,3-Dioxolane, 2-methyl-2-(1-methylethyl)-  
Formula C7H14O2, MW 130, CAS# 4405-16-7, Entry# 9468  
1,3-Dioxolane, 2-isopropyl-2-methyl-

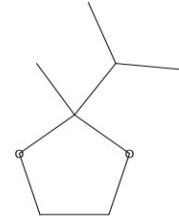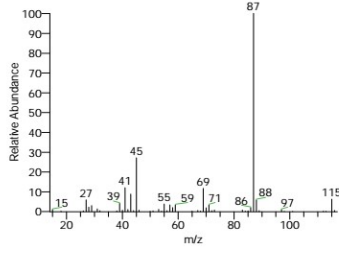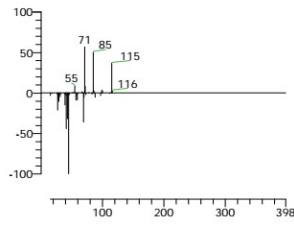

3-Hexanol, 2,3-dimethyl-  
Formula C8H18O, MW 130, CAS# 4166-46-5, Entry# 11828  
2,3-Dimethyl-3-hexanol

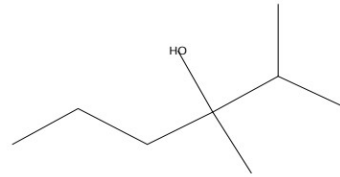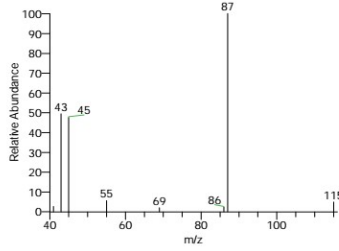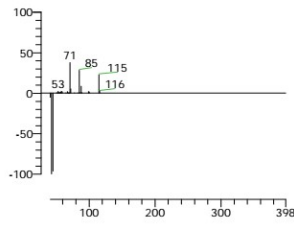

Oxalacetic acid  
Formula C4H4O5, MW 132, CAS# 328-42-7, Entry# 14374  
\$:06Q-TOF

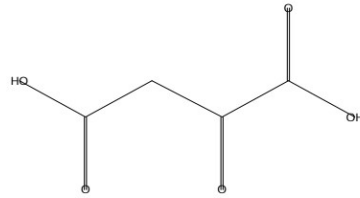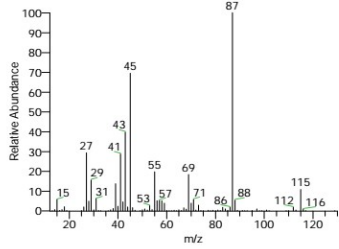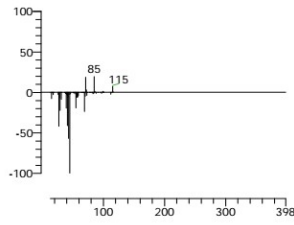

4-Heptanol, 4-methyl-  
Formula C8H18O, MW 130, CAS# 598-01-6, Entry# 52013  
4-Hydroxy-4-methylheptane

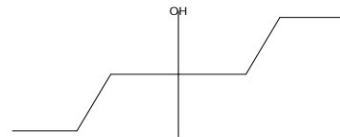

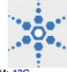

# ChemLab Technologies - GC/MS Report

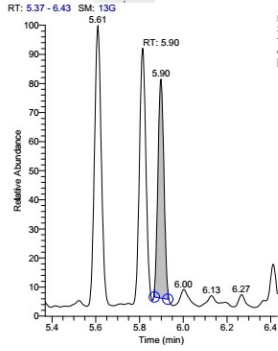

NL:  
3.77E6  
TIC F: (0.0) +  
c EI Full ms  
(50.00-400.00)  
MS ICIS 12

12 #1588 RT: 5.90 AV: 1 AV: 5 SB: 12 1581-1586 1590-1595 NL: 1.38E6  
F: (0.0) + c EI Full ms (50.00-400.00)

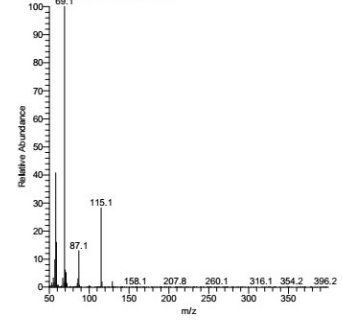

| RT   | SI  | RSI | Probability | Library | Molecular Formula | Molecular Weight |
|------|-----|-----|-------------|---------|-------------------|------------------|
| 5.90 | 715 | 726 | 27.08       | mainlib | C9H16O3           | 172              |
| 5.90 | 704 | 713 | 18.58       | mainlib | C9H16O3           | 172              |
| 5.90 | 686 | 700 | 9.58        | replib  | C8H16O3           | 160              |
| 5.90 | 676 | 677 | 6.76        | mainlib | C12H22O3          | 214              |
| 5.90 | 675 | 685 | 6.50        | replib  | C7H16O            | 116              |

## Hit Spectrum

## Delta

## Compound Structure

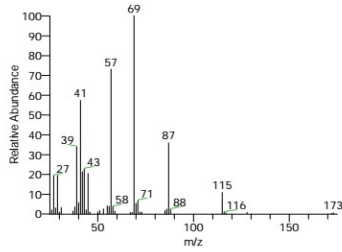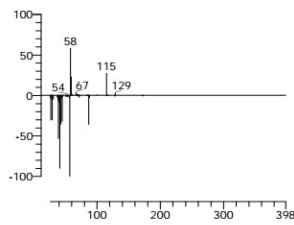

1,3-Dioxan-4-one, 2-(1,1-dimethylethyl)-6-methyl-  
Formula C9H16O3, MW 172, CAS# 113505-75-2, Entry# 32217  
2-tert-Butyl-6-methyl-1,3-dioxan-4-one #

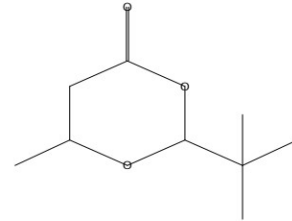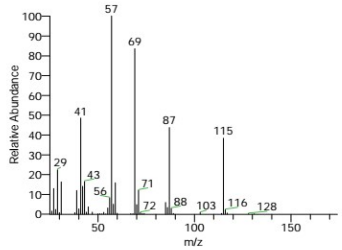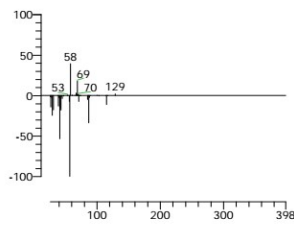

1,3-Dioxan-4-one, 2-(1,1-dimethylethyl)-5-methyl-, (2s-cis)-  
Formula C9H16O3, MW 172, CAS# 107289-32-7, Entry# 23371  
2-tert-Butyl-5-methyl-1,3-dioxan-4-one #

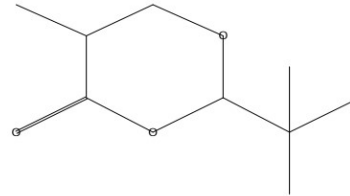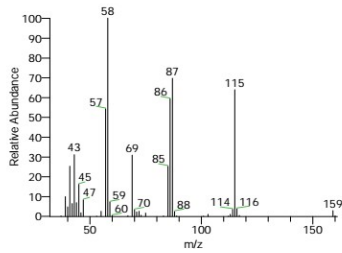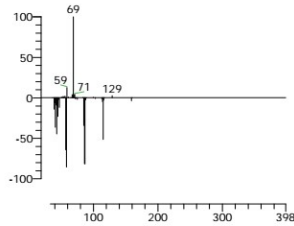

Furan, 2,5-diethoxytetrahydro-  
Formula C8H16O3, MW 160, CAS# 3320-90-9, Entry# 6616  
2,5-Diethoxytetrahydrofuran

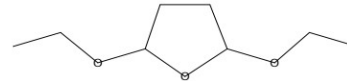





# ChemLab Technologies - GC/MS Report

Hit Spectrum

Delta

Compound Structure

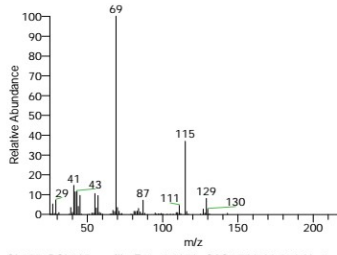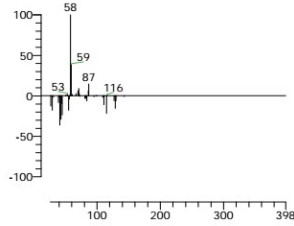

1,3-Dioxan-4-one, 2-heptyl-6-methyl  
 Formula C<sub>12</sub>H<sub>22</sub>O<sub>3</sub>, MW 214, CAS# 99902-24-6, Entry# 33005  
 2-Heptyl-6-methyl-1,3-dioxan-4-one #

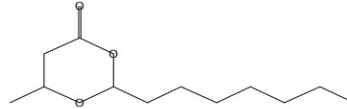

SI 675, RSI 685, replib, Entry# 6979, CAS# 589-82-2, 3-Heptanol

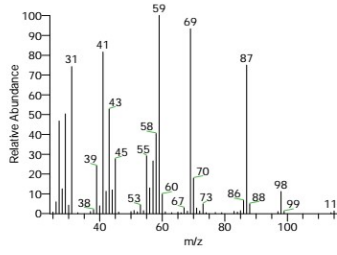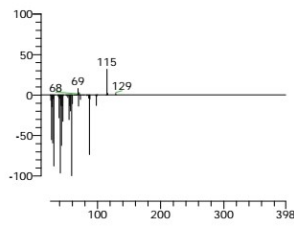

3-Heptanol  
 Formula C<sub>7</sub>H<sub>16</sub>O, MW 116, CAS# 589-82-2, Entry# 6979  
 3-Hydroxyheptane

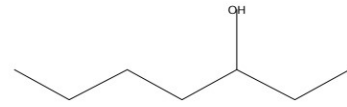

RT: 5.89 - 6.93 SM: 13G

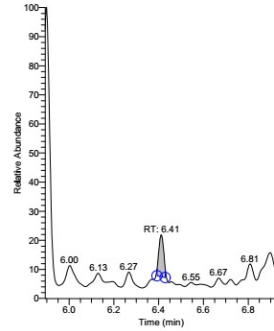

NL:  
 3.07E6  
 TIC F: (0.0) +  
 c EI Full ms  
 [50.00-400.00]  
 MS ICIS 12

12 #1739 RT: 6.41 AV: 1 AV: 5 SB: 12 1732-1737 1741-1746 NL: 5.39E5  
 F: (0.0) + c EI Full ms [50.00-400.00]

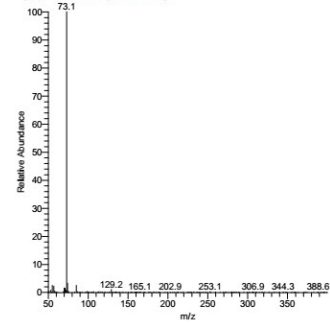

| RT   | SI  | RSI | Probability | Library   | Molecular Formula                             | Molecular Weight |
|------|-----|-----|-------------|-----------|-----------------------------------------------|------------------|
| 6.41 | 903 | 995 | 51.00       | nist_msms | C <sub>4</sub> H <sub>9</sub> NO <sub>2</sub> | 103              |
| 6.41 | 876 | 949 | 15.00       | replib    | C <sub>3</sub> H <sub>6</sub> O <sub>2</sub>  | 74               |
| 6.41 | 846 | 999 | 4.17        | nist_msms | C <sub>4</sub> H <sub>10</sub> O <sub>2</sub> | 90               |
| 6.41 | 846 | 999 | 4.17        | nist_msms | C <sub>4</sub> H <sub>11</sub> NO             | 89               |
| 6.41 | 844 | 898 | 3.84        | mainlib   | C <sub>4</sub> H <sub>8</sub> O <sub>3</sub>  | 104              |



# ChemLab Technologies - GC/MS Report

Hit Spectrum

Delta

Compound Structure

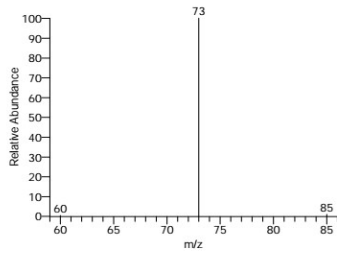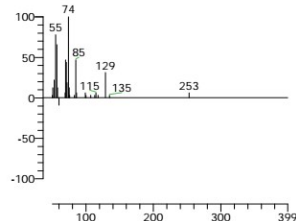

DL-3-Aminoisobutyric acid  
Formula C<sub>4</sub>H<sub>9</sub>NO<sub>2</sub>, MW 103, CAS# 144-90-1, Entry# 12270  
\$.0617/ion trap

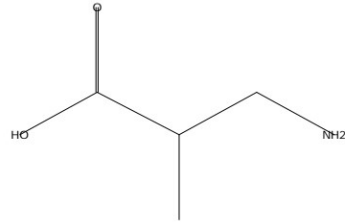

1,3-Dioxolane  
Formula C<sub>3</sub>H<sub>6</sub>O<sub>2</sub>, MW 74, CAS# 646-06-0, Entry# 8899  
Ethylene glycol formal

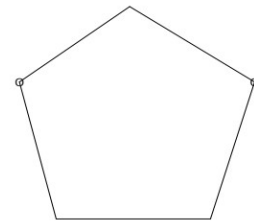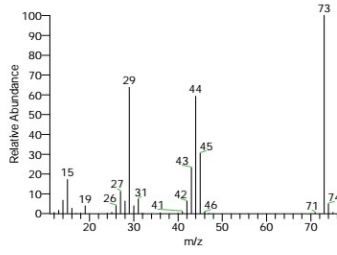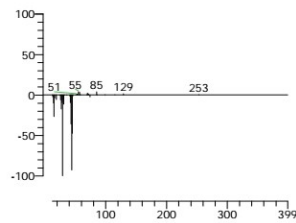

4-Amino-1-butanol  
Formula C<sub>4</sub>H<sub>11</sub>NO, MW 89, CAS# 13325-10-5, Entry# 11062  
\$.0617/ion trap

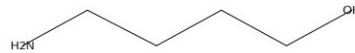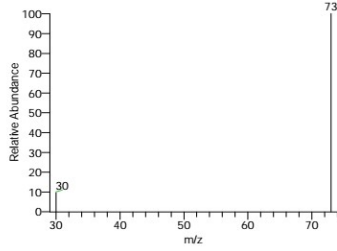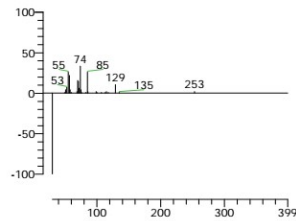

2-Ethoxyethanol  
Formula C<sub>4</sub>H<sub>10</sub>O<sub>2</sub>, MW 90, CAS# 110-80-5, Entry# 25170  
\$.06Q-TOF

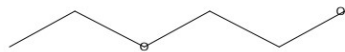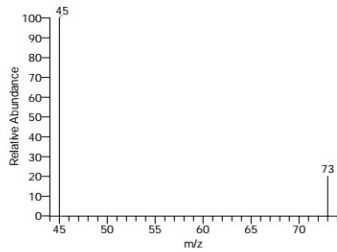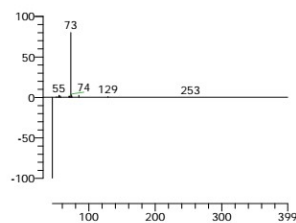



# ChemLab Technologies - GC/MS Report

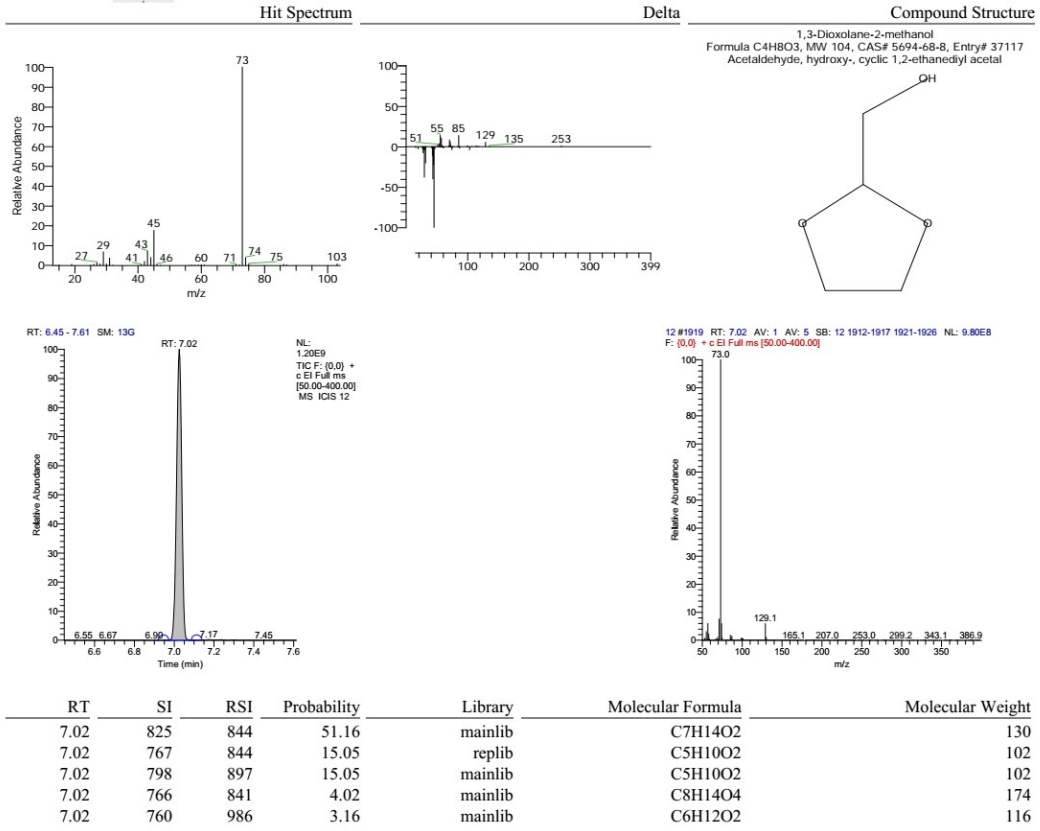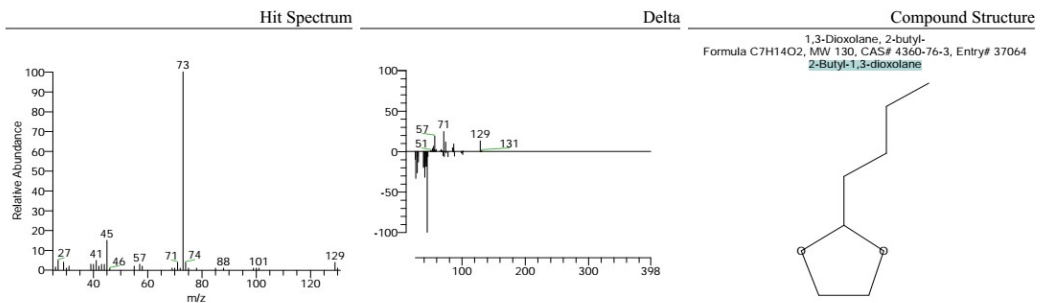



# ChemLab Technologies - GC/MS Report

Hit Spectrum

Delta

Compound Structure

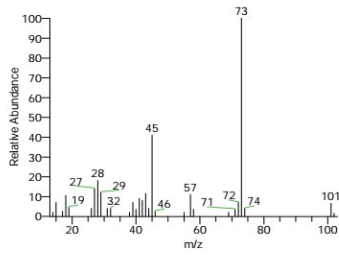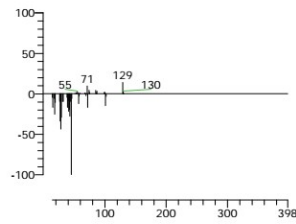

1,3-Dioxolane, 2-ethyl-  
Formula C5H10O2, MW 102, CAS# 2568-96-9, Entry# 37066  
Propanal, cyclic 1,2-ethanediyil acetal

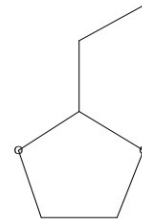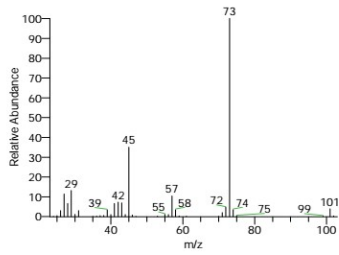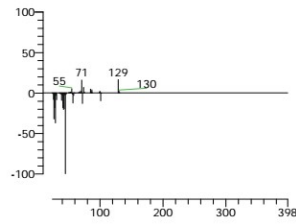

1,3-Dioxolane, 2-ethyl-  
Formula C5H10O2, MW 102, CAS# 2568-96-9, Entry# 8959  
Propanal, cyclic 1,2-ethanediyil acetal

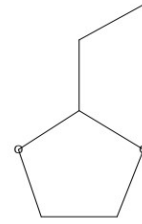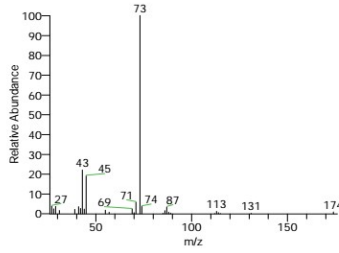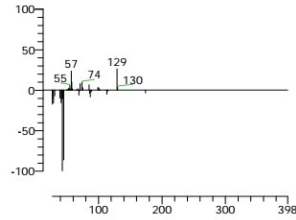

Acetic acid, 3-[1,3]dioxolan-2-ylpropyl ester  
Formula C8H14O4, MW 174, CAS# NA, Entry# 36951  
3-(1,3-Dioxolan-2-yl)propyl acetate #

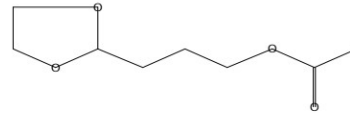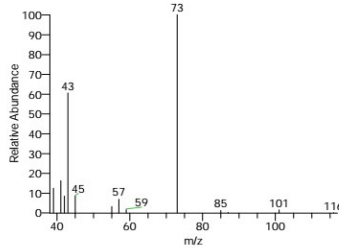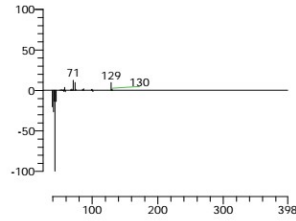

2-Butanone, 3-methoxy-3-methyl-  
Formula C6H12O2, MW 116, CAS# 36687-98-6, Entry# 36944  
3-Methoxy-3-methyl-2-butanone #

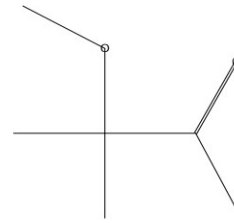

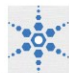

# ChemLab Technologies - GC/MS Report

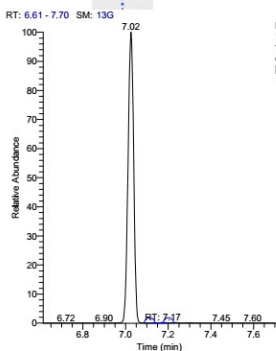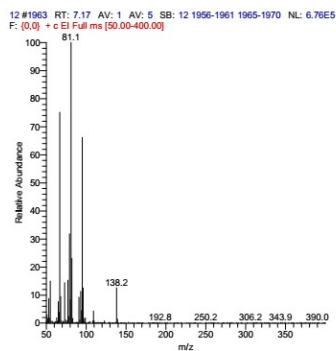

| RT   | SI  | RSI | Probability | Library | Molecular Formula | Molecular Weight |
|------|-----|-----|-------------|---------|-------------------|------------------|
| 7.17 | 822 | 825 | 15.04       | mainlib | C10H18            | 138              |
| 7.17 | 804 | 821 | 7.75        | mainlib | C10H18            | 138              |
| 7.17 | 798 | 817 | 6.09        | mainlib | C10H18            | 138              |
| 7.17 | 797 | 819 | 5.86        | replib  | C10H18            | 138              |
| 7.17 | 788 | 812 | 4.25        | mainlib | C10H18            | 138              |

## Hit Spectrum

## Delta

## Compound Structure

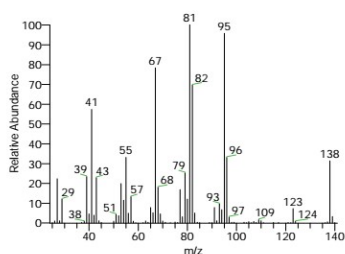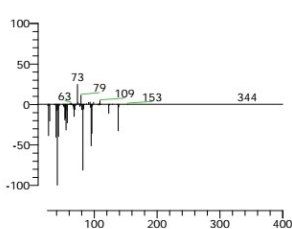

Cyclohexene, 1-(2-methylpropyl)-  
Formula C10H18, MW 138, CAS# 3983-03-7, Entry# 45931  
1-Isobutyl-1-cyclohexene #

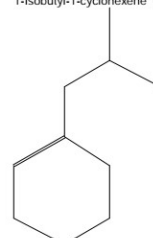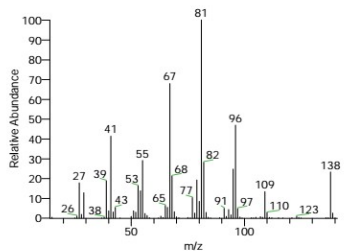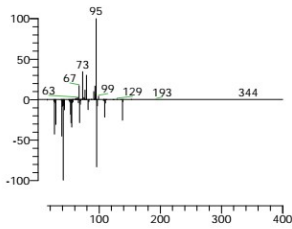

Cyclohexene, 1-butyl-  
Formula C10H18, MW 138, CAS# 3282-53-9, Entry# 45677  
1-Butyl-1-cyclohexene

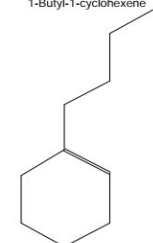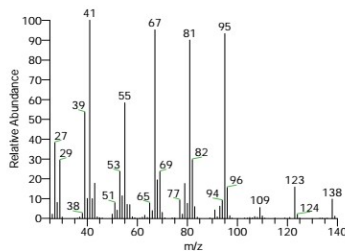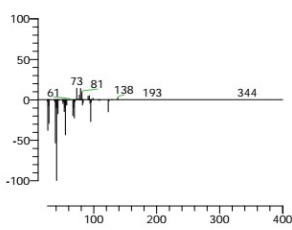

Bicyclo[4.1.0]heptane, 3,7,7-trimethyl-, [1S-(1a,3a,6a)]-  
Formula C10H18, MW 138, CAS# 6069-97-2, Entry# 3035  
3,7,7-Trimethylbicyclo[4.1.0]heptane #

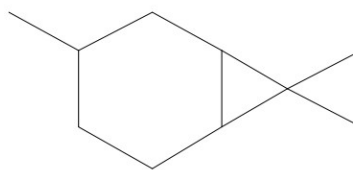



# ChemLab Technologies - GC/MS Report

Hit Spectrum

Delta

Compound Structure

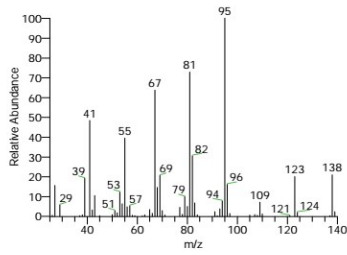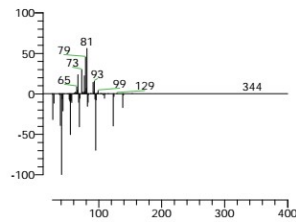

Bicyclo[4.1.0]heptane, 3,7,7-trimethyl-  
Formula C10H18, MW 138, CAS# 554-59-6, Entry# 13537  
Carane

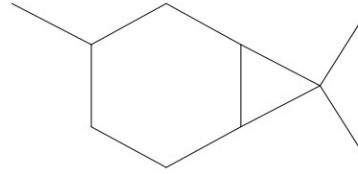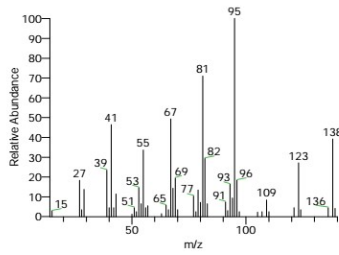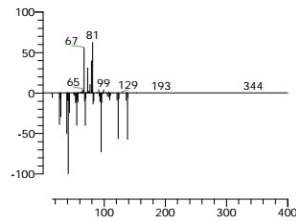

Bicyclo[4.1.0]heptane, 3,7,7-trimethyl-, [1S-(1a,3a,6a)]-  
Formula C10H18, MW 138, CAS# 2778-68-9, Entry# 61997  
Carane, (1S,3S,6R)-(-)-

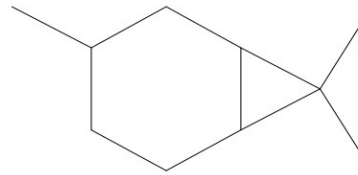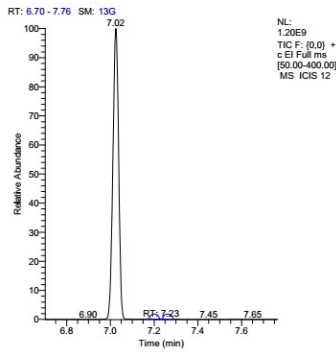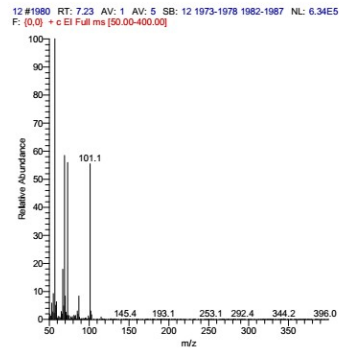

| RT   | SI  | RSI | Probability | Library | Molecular Formula | Molecular Weight |
|------|-----|-----|-------------|---------|-------------------|------------------|
| 7.23 | 694 | 696 | 19.21       | mainlib | C9H14O5           | 202              |
| 7.23 | 692 | 709 | 17.72       | mainlib | C10H22O           | 158              |
| 7.23 | 661 | 688 | 10.20       | replib  | C8H18O            | 130              |
| 7.23 | 676 | 676 | 10.20       | replib  | C8H18O            | 130              |
| 7.23 | 665 | 683 | 7.00        | mainlib | C10H22O4S         | 238              |



# ChemLab Technologies - GC/MS Report

Hit Spectrum

Delta

Compound Structure

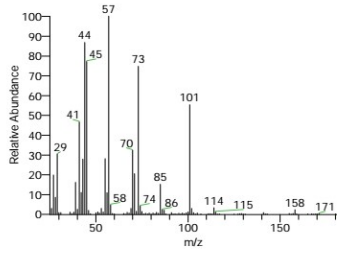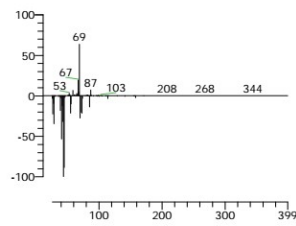

2-tert-Butyl-4-methyl-5-oxo-1,3-dioxolane-4-carboxylic acid  
Formula C<sub>9</sub>H<sub>14</sub>O<sub>5</sub>, MW 202, CAS# NA, Entry# 22882  
2-tert-Butyl-4-methyl-5-oxo-1,3-dioxolane-4-carboxylic acid #

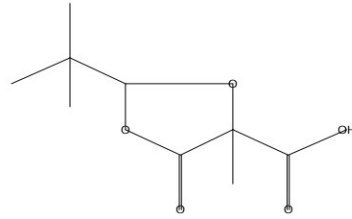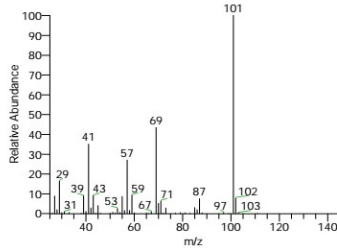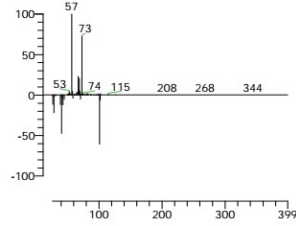

Pentane, 2,2,4,4-tetramethyl-3-methoxy-  
Formula C<sub>10</sub>H<sub>22</sub>O, MW 158, CAS# NA, Entry# 67348  
3-Methoxy-2,2,4,4-tetramethylpentane #

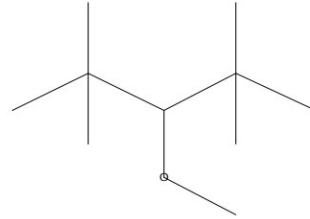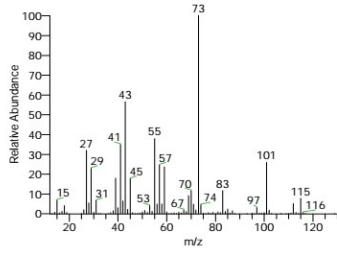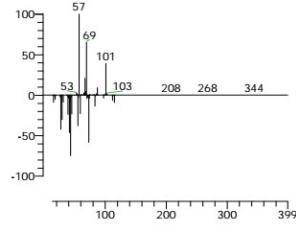

3-Hexanol, 3,5-dimethyl-  
Formula C<sub>8</sub>H<sub>18</sub>O, MW 130, CAS# 4209-91-0, Entry# 8934  
3,5-Dimethyl-3-hexanol

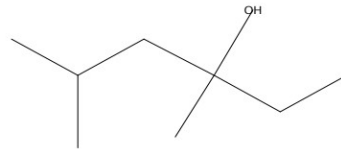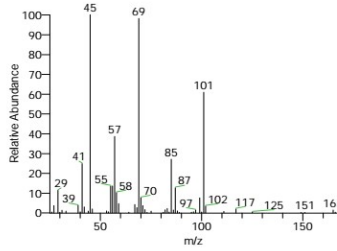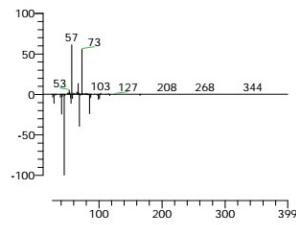

Sulfurous acid, isobutyl 2-methyl-4-methoxybutyl ester  
Formula C<sub>10</sub>H<sub>22</sub>O<sub>4</sub>S, MW 238, CAS# NA, Entry# 16114

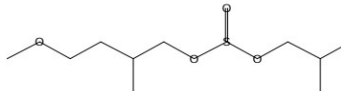



# ChemLab Technologies - GC/MS Report

Hit Spectrum

Delta

Compound Structure

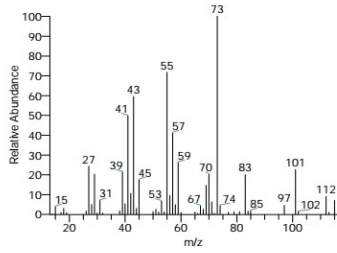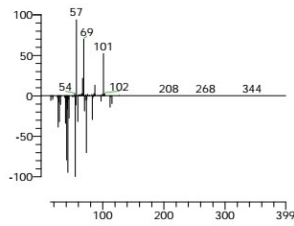

3-Hexanol, 3,5-dimethyl-  
Formula C<sub>8</sub>H<sub>18</sub>O, MW 130, CAS# 4209-91-0, Entry# 9008  
3,5-Dimethyl-3-hexanol

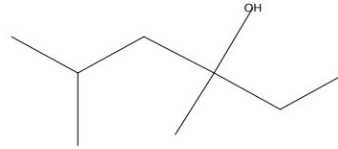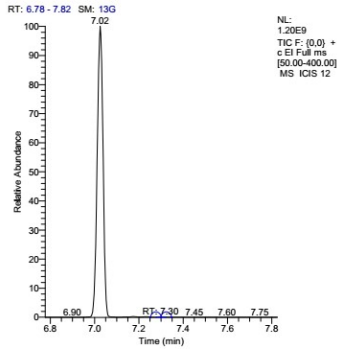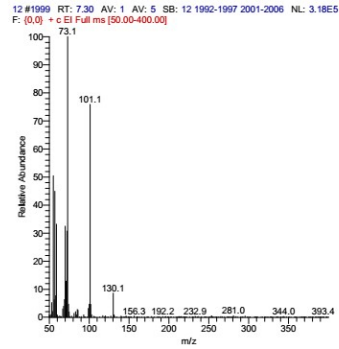

| RT   | SI  | RSI | Probability | Library | Molecular Formula                             | Molecular Weight |
|------|-----|-----|-------------|---------|-----------------------------------------------|------------------|
| 7.30 | 744 | 825 | 38.96       | mainlib | C <sub>9</sub> H <sub>20</sub> O              | 144              |
| 7.30 | 717 | 746 | 11.46       | replib  | C <sub>8</sub> H <sub>18</sub> O              | 130              |
| 7.30 | 708 | 765 | 8.55        | replib  | C <sub>9</sub> H <sub>20</sub> O              | 144              |
| 7.30 | 709 | 723 | 8.55        | mainlib | C <sub>9</sub> H <sub>20</sub> O              | 144              |
| 7.30 | 695 | 707 | 5.35        | mainlib | C <sub>9</sub> H <sub>14</sub> O <sub>5</sub> | 202              |

Hit Spectrum

Delta

Compound Structure

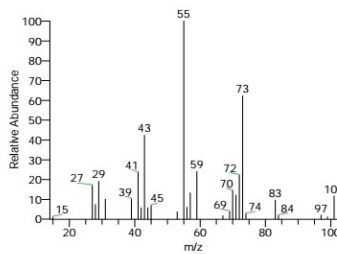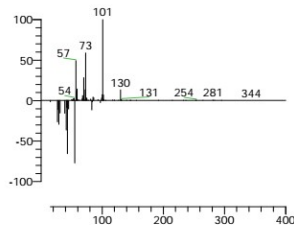

4-Heptanol, 3-ethyl-  
Formula C<sub>9</sub>H<sub>20</sub>O, MW 144, CAS# 19780-42-8, Entry# 19080  
3-Ethyl-4-heptanol

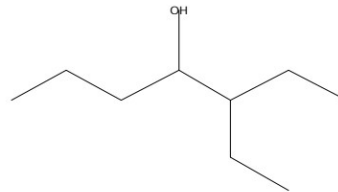





# ChemLab Technologies - GC/MS Report

Hit Spectrum

Delta

Compound Structure

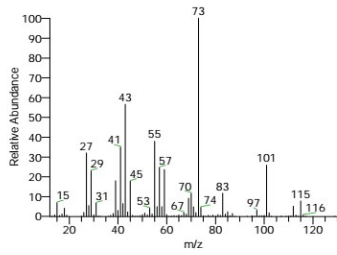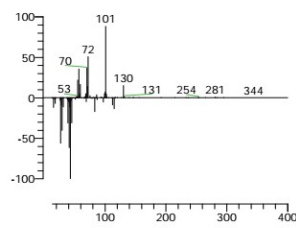

3-Hexanol, 3,5-dimethyl-  
Formula C<sub>8</sub>H<sub>18</sub>O, MW 130, CAS# 4209-91-0, Entry# 8934  
3,5-Dimethyl-3-hexanol

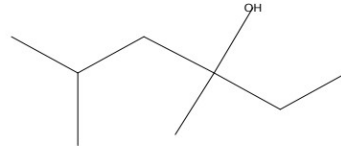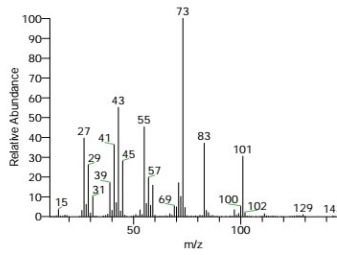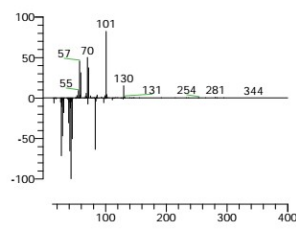

3-Heptanol, 2,4-dimethyl-  
Formula C<sub>9</sub>H<sub>20</sub>O, MW 144, CAS# 19549-72-5, Entry# 36963  
2,4-Dimethyl-3-heptanol

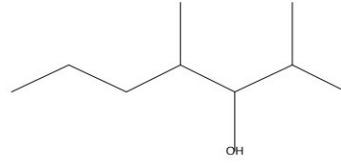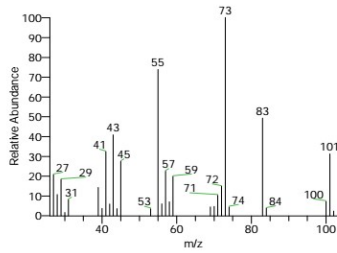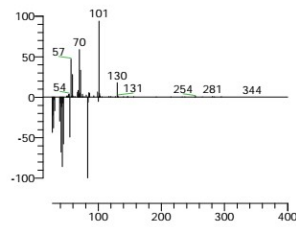

3-Heptanol, 2,4-dimethyl-  
Formula C<sub>9</sub>H<sub>20</sub>O, MW 144, CAS# 19549-72-5, Entry# 9012  
2,4-Dimethyl-3-heptanol

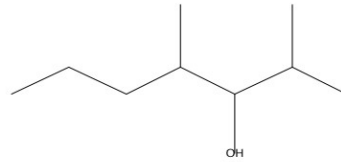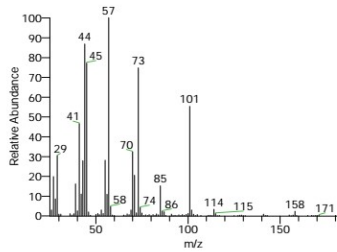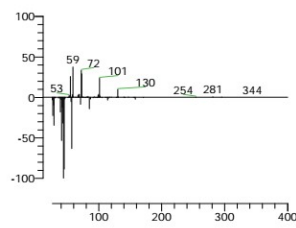

2-tert-Butyl-4-methyl-5-oxo-1,3-dioxolane-4-carboxylic acid #  
Formula C<sub>9</sub>H<sub>14</sub>O<sub>5</sub>, MW 202, CAS# NA, Entry# 22882  
2-tert-Butyl-4-methyl-5-oxo-1,3-dioxolane-4-carboxylic acid #

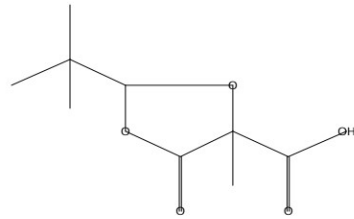



# ChemLab Technologies - GC/MS Report

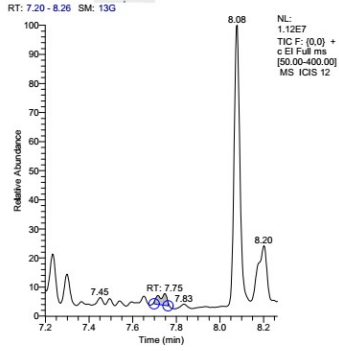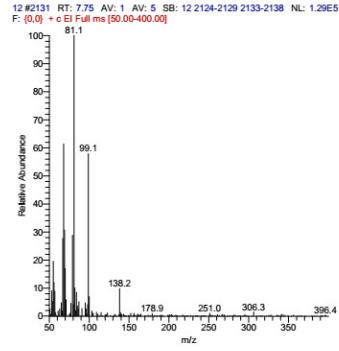

| RT   | SI  | RSI | Probability | Library | Molecular Formula | Molecular Weight |
|------|-----|-----|-------------|---------|-------------------|------------------|
| 7.75 | 637 | 703 | 10.45       | replib  | C7H14O            | 114              |
| 7.75 | 652 | 752 | 10.45       | mainlib | C7H14O            | 114              |
| 7.75 | 633 | 679 | 5.39        | mainlib | C10H20O           | 156              |
| 7.75 | 634 | 688 | 5.39        | replib  | C10H20O           | 156              |
| 7.75 | 630 | 683 | 4.55        | mainlib | C10H20O           | 156              |

## Hit Spectrum

## Delta

## Compound Structure

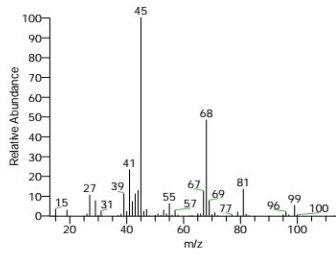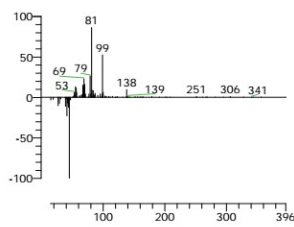

Cyclopentanemethanol, 3-methyl-  
Formula C7H14O, MW 114, CAS# 52829-98-8, Entry# 16093  
1-Cyclopentylethanol

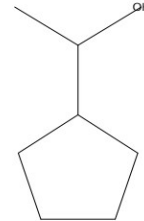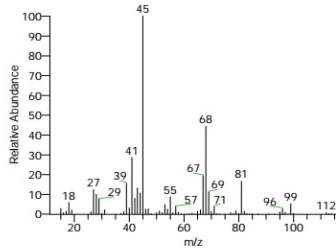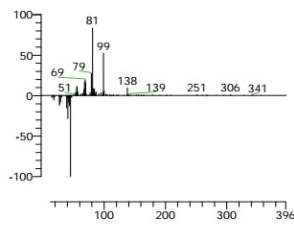

Cyclopentanemethanol, 3-methyl-  
Formula C7H14O, MW 114, CAS# 52829-98-8, Entry# 3910  
1-Cyclopentylethanol

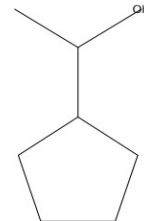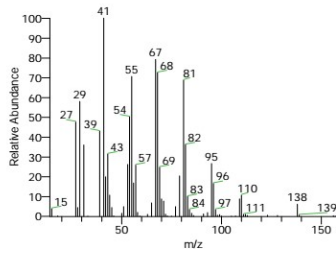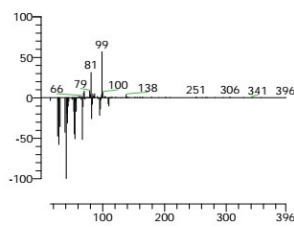

(Z)-4-Decen-1-ol  
Formula C10H20O, MW 156, CAS# 57074-37-0, Entry# 1090  
cis-4-Decen-1-ol

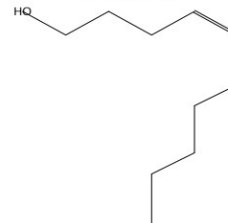



# ChemLab Technologies - GC/MS Report

Hit Spectrum

Delta

Compound Structure

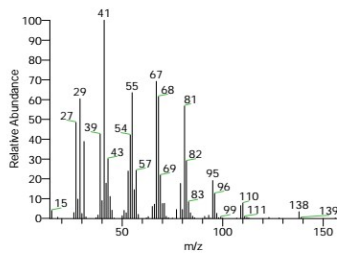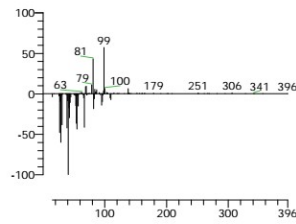

(Z)-4-Decen-1-ol  
Formula C10H20O, MW 156, CAS# 57074-37-0, Entry# 3002  
cis-4-Decen-1-ol

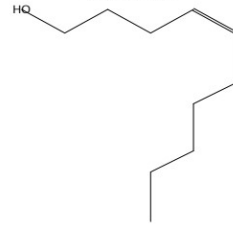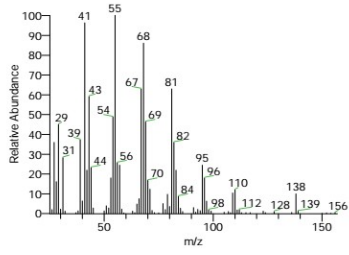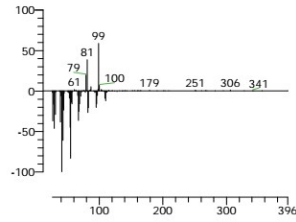

3-Decen-1-ol, (Z)-  
Formula C10H20O, MW 156, CAS# 10340-22-4, Entry# 17967  
cis-3-Decen-1-ol

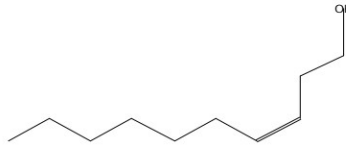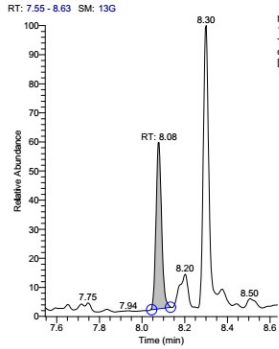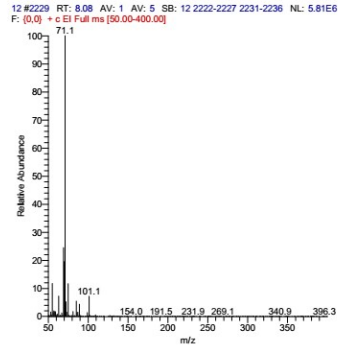

| RT   | SI  | RSI | Probability | Library | Molecular Formula | Molecular Weight |
|------|-----|-----|-------------|---------|-------------------|------------------|
| 8.08 | 734 | 797 | 29.84       | replib  | C10H22O           | 158              |
| 8.08 | 720 | 775 | 29.84       | mainlib | C10H22O           | 158              |
| 8.08 | 747 | 800 | 29.84       | replib  | C10H22O           | 158              |
| 8.08 | 717 | 796 | 8.29        | replib  | C10H22O           | 158              |
| 8.08 | 711 | 780 | 6.52        | mainlib | C9H18O            | 142              |



# ChemLab Technologies - GC/MS Report

| Hit Spectrum                                                      | Delta | Compound Structure |                                                                                                                                                                  |
|-------------------------------------------------------------------|-------|--------------------|------------------------------------------------------------------------------------------------------------------------------------------------------------------|
| SI 747, RSI 800, replib, Entry# 8599, CAS# 693-65-2, n-Amyl ether |       |                    | n-Amyl ether<br>Formula C <sub>10</sub> H <sub>22</sub> O, MW 158, CAS# 693-65-2, Entry# 8599<br>Pentane, 1,1'-oxybis-<br><chem>CCCCCOCCCC</chem>                |
| SI 734, RSI 797, replib, Entry# 2568, CAS# 693-65-2, n-Amyl ether |       |                    | n-Amyl ether<br>Formula C <sub>10</sub> H <sub>22</sub> O, MW 158, CAS# 693-65-2, Entry# 2568<br>Pentane, 1,1'-oxybis-<br><chem>CCCCCOCCCC</chem>                |
|                                                                   |       |                    | n-Amyl ether<br>Formula C <sub>10</sub> H <sub>22</sub> O, MW 158, CAS# 693-65-2, Entry# 35145<br>Pentane, 1,1'-oxybis-<br><chem>CCCCCOCCCC</chem>               |
|                                                                   |       |                    | Butane, 1,1'-oxybis[3-methyl-]<br>Formula C <sub>10</sub> H <sub>22</sub> O, MW 158, CAS# 544-01-4, Entry# 8594<br>Isopentyl ether<br><chem>CC(C)CCOC(C)C</chem> |



# ChemLab Technologies - GC/MS Report

Hit Spectrum

Delta

Compound Structure

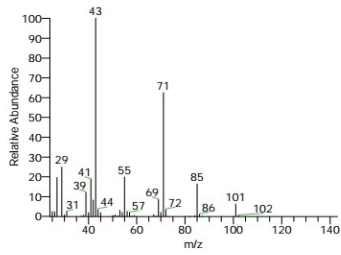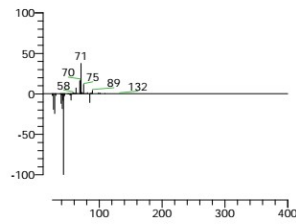

Ether, 3-butenyl pentyl  
Formula C<sub>9</sub>H<sub>18</sub>O, MW 142, CAS# 34061-78-4, Entry# 8274  
3-Butenyl pentyl ether #

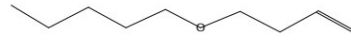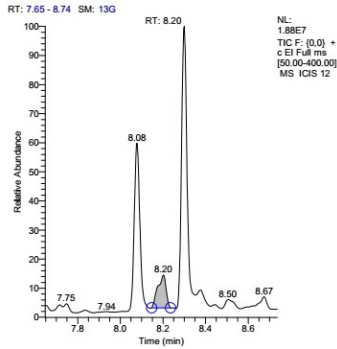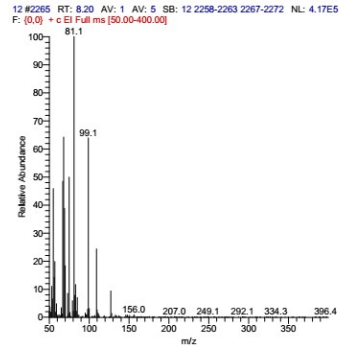

| RT   | SI  | RSI | Probability | Library | Molecular Formula                              | Molecular Weight |
|------|-----|-----|-------------|---------|------------------------------------------------|------------------|
| 8.20 | 741 | 800 | 44.61       | mainlib | C <sub>10</sub> H <sub>20</sub> O              | 156              |
| 8.20 | 646 | 655 | 3.61        | mainlib | C <sub>9</sub> H <sub>14</sub> O <sub>2</sub>  | 154              |
| 8.20 | 635 | 682 | 2.47        | mainlib | C <sub>9</sub> H <sub>18</sub> O               | 142              |
| 8.20 | 635 | 693 | 2.47        | mainlib | C <sub>8</sub> H <sub>15</sub> NO <sub>3</sub> | 173              |
| 8.20 | 631 | 687 | 2.09        | mainlib | C <sub>10</sub> H <sub>18</sub> O <sub>2</sub> | 170              |

Hit Spectrum

Delta

Compound Structure

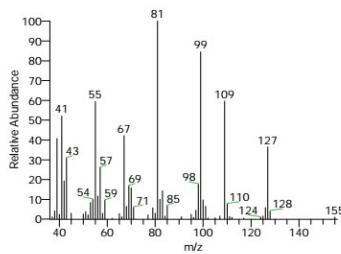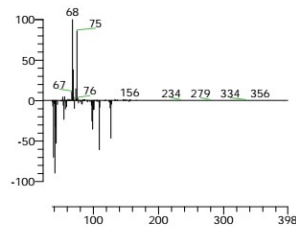

Tetrahydrofuran, 2-ethyl-5-butyl-  
Formula C<sub>10</sub>H<sub>20</sub>O, MW 156, CAS# 164584-36-5, Entry# 46058  
2-Butyl-5-ethyltetrahydrofuran #

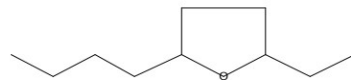



# ChemLab Technologies - GC/MS Report

Hit Spectrum

Delta

Compound Structure

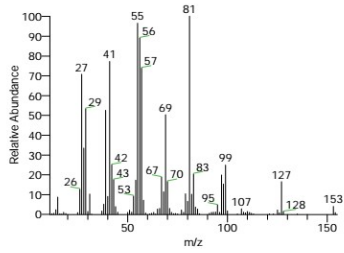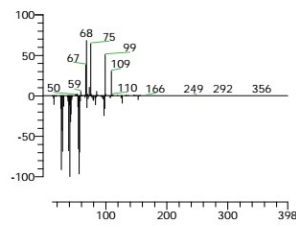

1,3-Benzodioxole, 2-ethenylhexahydro-  
Formula C<sub>9</sub>H<sub>14</sub>O<sub>2</sub>, MW 154, CAS# 55702-63-1, Entry# 45543  
2-Vinylhexahydro-1,3-benzodioxole #

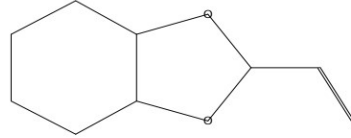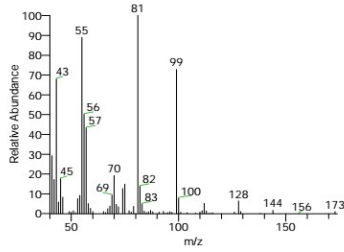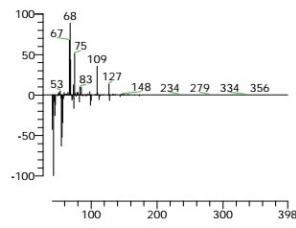

Δ-[5-Ethyl-2,3,4,5-tetrahydro-2-furyl]glycine  
Formula C<sub>8</sub>H<sub>15</sub>NO<sub>3</sub>, MW 173, CAS# NA, Entry# 45571  
2-Amino-3,6-anhydro-2,4,5-trideoxy-6-ethylhexonic acid #

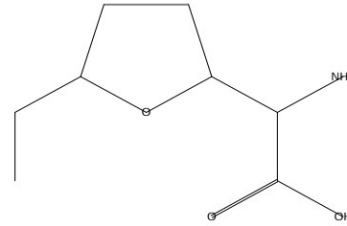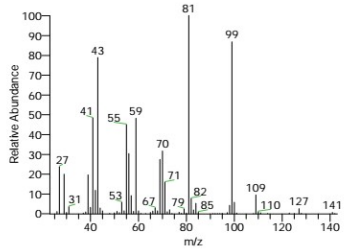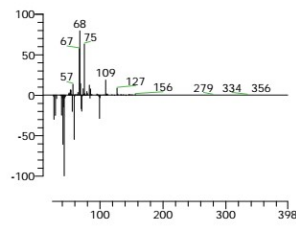

Furan, tetrahydro-2,2-dimethyl-5-(1-methylethyl)-  
Formula C<sub>9</sub>H<sub>18</sub>O, MW 142, CAS# 97265-00-4, Entry# 46050  
5-Isopropyl-2,2-dimethyltetrahydrofuran #

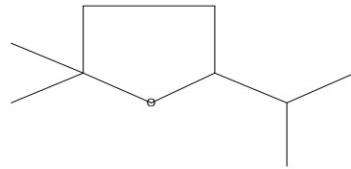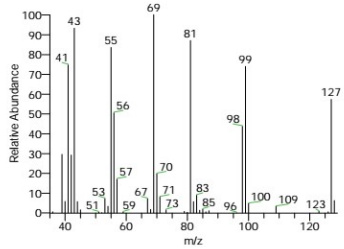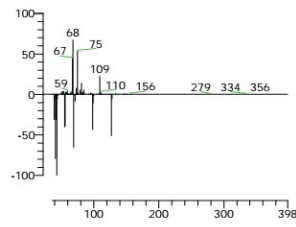

2-Oxepanone, 4-methyl-7-(1-methylethyl)-  
Formula C<sub>10</sub>H<sub>18</sub>O<sub>2</sub>, MW 170, CAS# 499-54-7, Entry# 31881  
3-Methyl-6-isopropyl-6-hexanolide

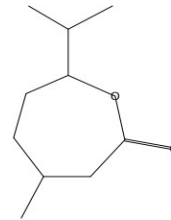



# ChemLab Technologies - GC/MS Report

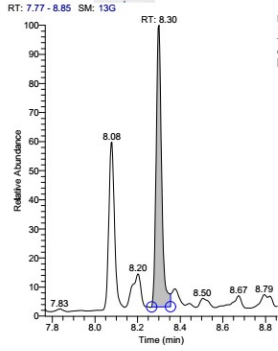

NL: 1.88E7  
TIC F: (0.0) +  
c EI Full ms  
(50.00-400.00)  
MS ICS 12

12 #2294 RT: 8.30 AV: 1 AV: 5 SB: 12 2287-2292 2296-2301 NL: 9.75E6  
F: (0.0) + c EI Full ms (50.00-400.00)

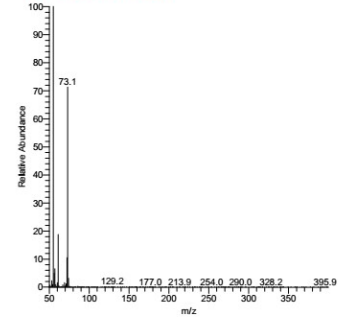

| RT   | SI  | RSI | Probability | Library | Molecular Formula | Molecular Weight |
|------|-----|-----|-------------|---------|-------------------|------------------|
| 8.30 | 884 | 884 | 75.21       | mainlib | C5H12O2           | 104              |
| 8.30 | 931 | 933 | 75.21       | replib  | C5H12O2           | 104              |
| 8.30 | 853 | 901 | 11.87       | mainlib | C7H16O            | 116              |
| 8.30 | 865 | 917 | 11.87       | replib  | C7H16O            | 116              |
| 8.30 | 847 | 901 | 6.12        | replib  | C7H16O            | 116              |

## Hit Spectrum

## Delta

## Compound Structure

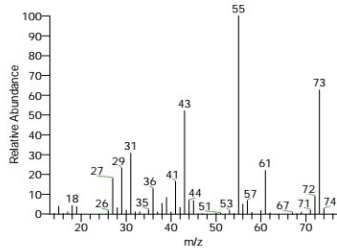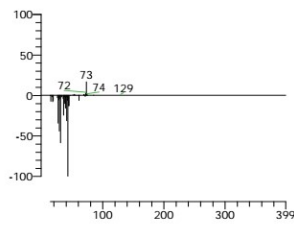

1,2-Pentanediol  
Formula C5H12O2, MW 104, CAS# 5343-92-0, Entry# 4801

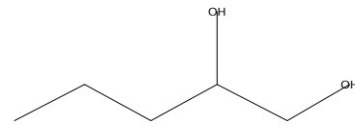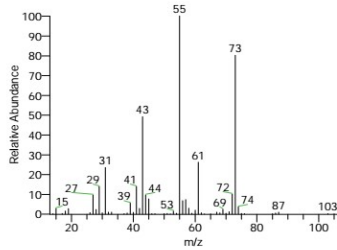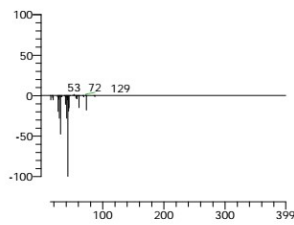

1,2-Pentanediol  
Formula C5H12O2, MW 104, CAS# 5343-92-0, Entry# 19085

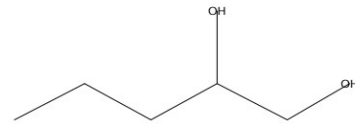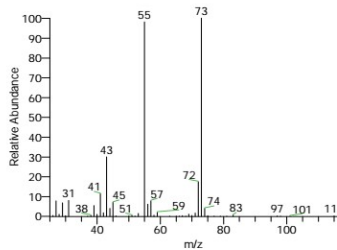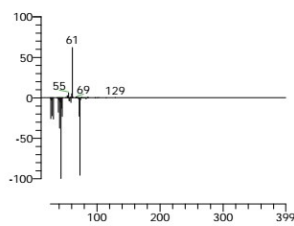

3-Hexanol, 2-methyl-  
1-isopropyl-1-butanol  
Formula C7H16O, MW 116, CAS# 617-29-8, Entry# 9005

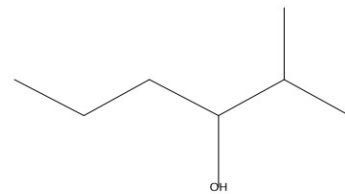



# ChemLab Technologies - GC/MS Report

Hit Spectrum

Delta

Compound Structure

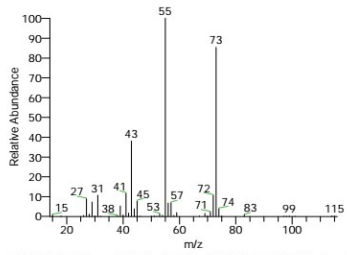

SI 847, RSI 901, replib, Entry# 4803, CAS# 589-55-9, 4-Heptanol

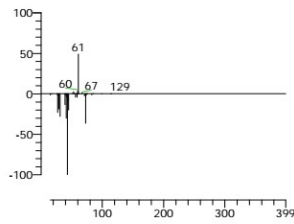

3-Hexanol, 2-methyl-1-isopropyl-1-butanol  
Formula C7H16O, MW 116, CAS# 617-29-8, Entry# 19081

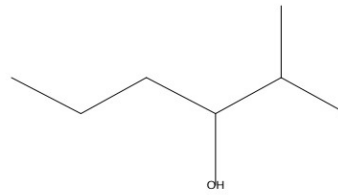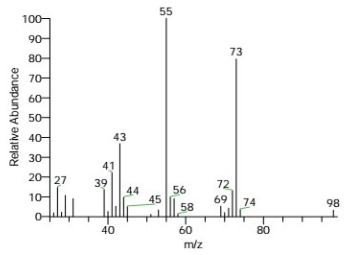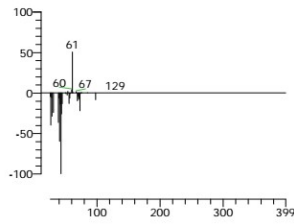

4-Heptanol  
Formula C7H16O, MW 116, CAS# 589-55-9, Entry# 4803  
Dipropylcarbinol

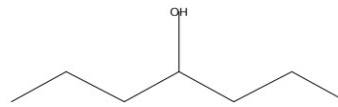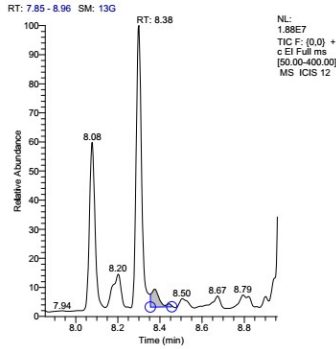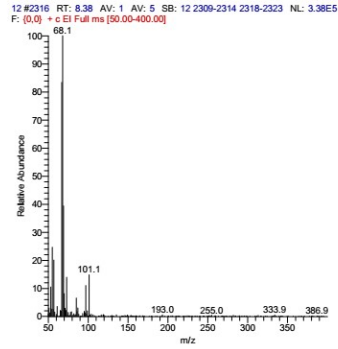

| RT   | SI  | RSI | Probability | Library | Molecular Formula | Molecular Weight |
|------|-----|-----|-------------|---------|-------------------|------------------|
| 8.38 | 708 | 792 | 29.11       | mainlib | C10H18O           | 154              |
| 8.38 | 703 | 795 | 23.46       | mainlib | C10H18O3          | 186              |
| 8.38 | 679 | 803 | 7.86        | replib  | C10H18O           | 154              |
| 8.38 | 677 | 752 | 7.25        | mainlib | C7H9F3O2          | 182              |
| 8.38 | 664 | 742 | 4.68        | mainlib | C10H18O3          | 186              |





# ChemLab Technologies - GC/MS Report

Hit Spectrum

Delta

Compound Structure

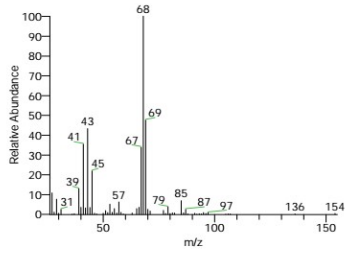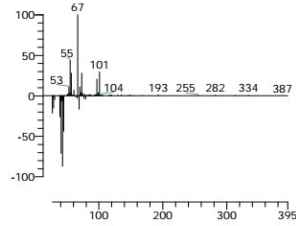

1,3-Nonadien-6-ol, 8-methyl-  
Formula C<sub>10</sub>H<sub>18</sub>O, MW 154, CAS# NA, Entry# 30766  
(6E)-2-Methyl-6,8-nonadien-4-ol #

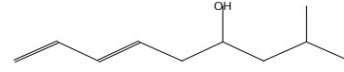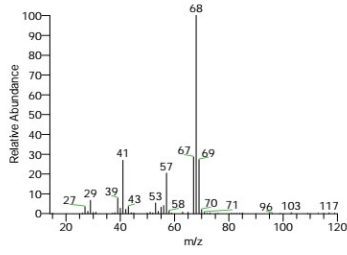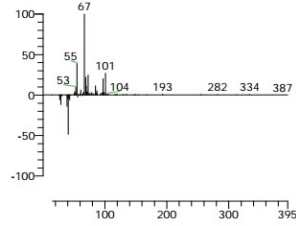

Isobutyl 3-methylbut-3-enyl carbonate  
Formula C<sub>10</sub>H<sub>18</sub>O<sub>3</sub>, MW 186, CAS# NA, Entry# 30712

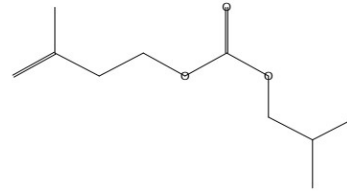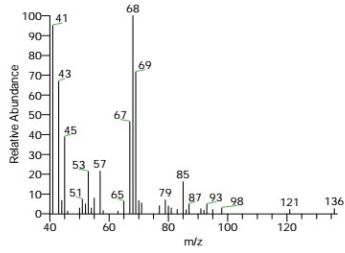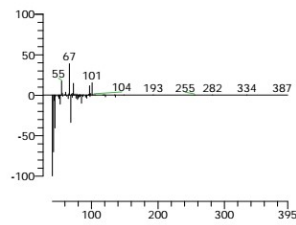

7-Octen-4-ol, 2-methyl-6-methylene-, (S)-  
Formula C<sub>10</sub>H<sub>18</sub>O, MW 154, CAS# 35628-05-8, Entry# 7820  
7-Octen-4-ol, 2-methyl-6-methylene-, (-)-

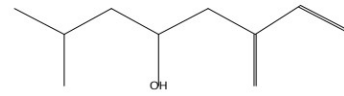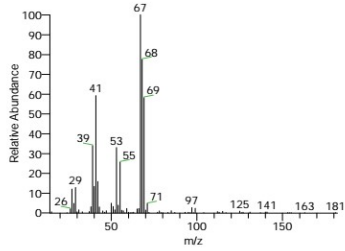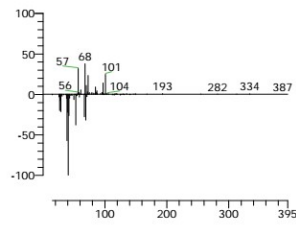

4-Penten-1-ol, trifluoroacetate  
Formula C<sub>7</sub>H<sub>9</sub>F<sub>3</sub>O<sub>2</sub>, MW 182, CAS# NA, Entry# 29969

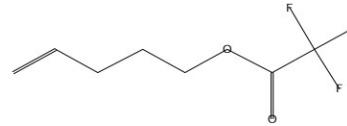



# ChemLab Technologies - GC/MS Report

Hit Spectrum

Delta

Compound Structure

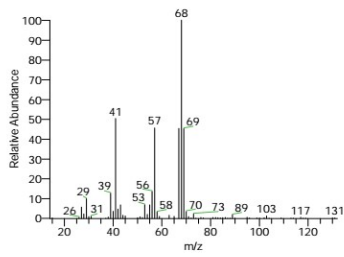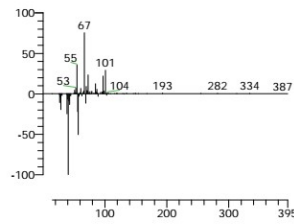

Isobutyl pent-4-enyl carbonate  
Formula C10H18O3, MW 186, CAS# NA, Entry# 30568

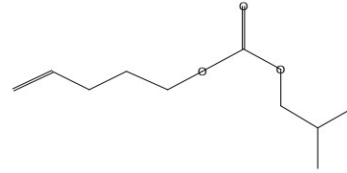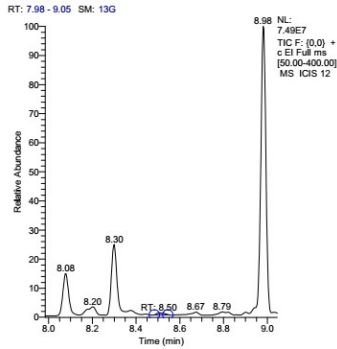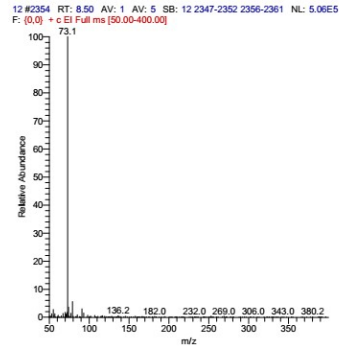

| RT   | SI  | RSI | Probability | Library   | Molecular Formula | Molecular Weight |
|------|-----|-----|-------------|-----------|-------------------|------------------|
| 8.50 | 798 | 963 | 30.33       | replib    | C3H6O2            | 74               |
| 8.50 | 769 | 877 | 8.59        | mainlib   | C6H14O            | 102              |
| 8.50 | 762 | 818 | 6.58        | mainlib   | C10H16O2          | 168              |
| 8.50 | 758 | 932 | 5.56        | nist_msms | C4H10O2           | 90               |
| 8.50 | 755 | 879 | 4.91        | mainlib   | C10H16BrCl3O2     | 352              |

Hit Spectrum

Delta

Compound Structure

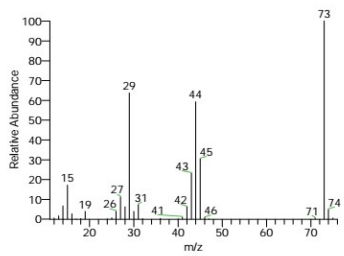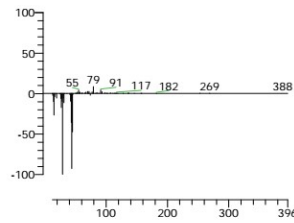

1,3-Dioxolane  
Formula C3H6O2, MW 74, CAS# 646-06-0, Entry# 8899  
Ethylene glycol formal

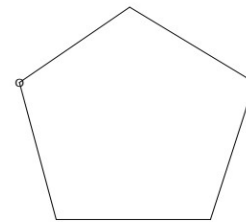



# ChemLab Technologies - GC/MS Report

Hit Spectrum

Delta

Compound Structure

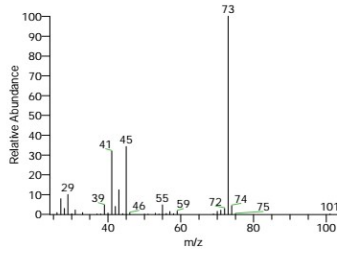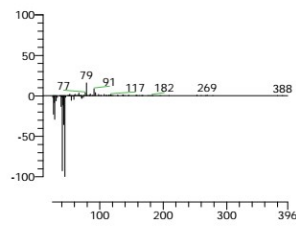

Pentane, 3-methoxy-  
Formula C<sub>6</sub>H<sub>14</sub>O, MW 102, CAS# 36839-67-5, Entry# 37087  
1-Ethylpropyl methyl ether

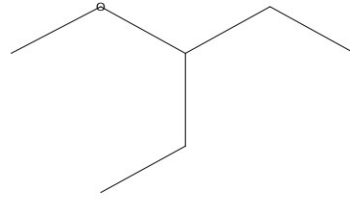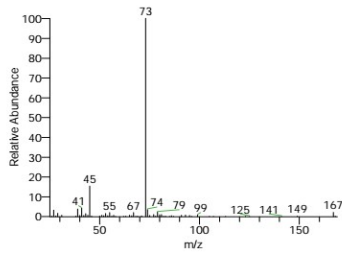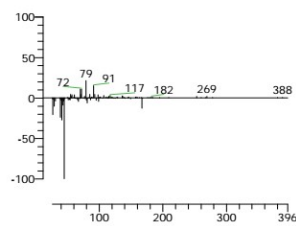

1,3-Dioxolane, 2-(6-heptynyl)-  
Formula C<sub>10</sub>H<sub>16</sub>O<sub>2</sub>, MW 168, CAS# 25595-82-8, Entry# 37084  
2-(6-Heptynyl)-1,3-dioxolane #

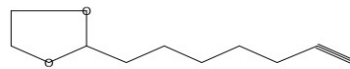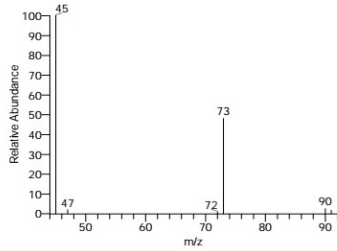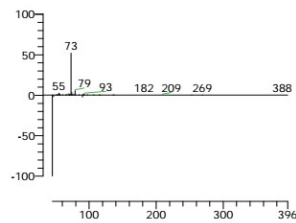

2-Ethoxyethanol  
Formula C<sub>4</sub>H<sub>10</sub>O<sub>2</sub>, MW 90, CAS# 110-80-5, Entry# 25158  
\$.06Q-TOF

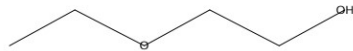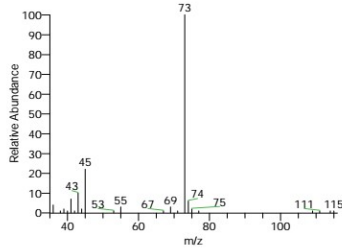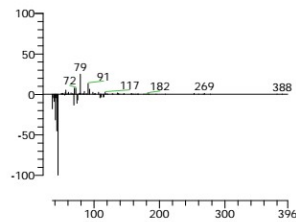

1,3-Dioxolane, 2-(3-bromo-5,5,5-trichloro-2,2-dimethylpentyl)-  
Formula C<sub>10</sub>H<sub>16</sub>BrCl<sub>3</sub>O<sub>2</sub>, MW 352, CAS# NA, Entry# 37089  
2-(3-Bromo-5,5,5-trichloro-1,1-dimethylpentyl)-1,3-dioxolane #

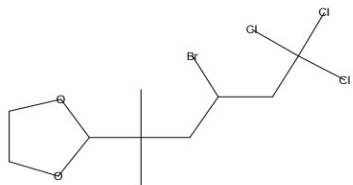



# ChemLab Technologies - GC/MS Report

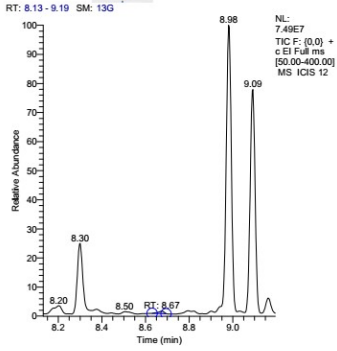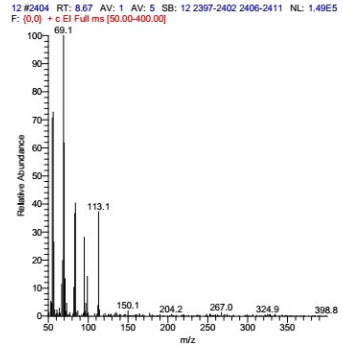

| RT   | SI  | RSI | Probability | Library | Molecular Formula | Molecular Weight |
|------|-----|-----|-------------|---------|-------------------|------------------|
| 8.67 | 686 | 801 | 8.78        | replib  | C8H18O            | 130              |
| 8.67 | 696 | 758 | 8.78        | replib  | C8H18O            | 130              |
| 8.67 | 700 | 784 | 8.78        | replib  | C8H18O            | 130              |
| 8.67 | 698 | 759 | 8.09        | mainlib | C10H17F3O2        | 226              |
| 8.67 | 691 | 818 | 6.20        | mainlib | C8H16             | 112              |

## Hit Spectrum

SI 700, RSI 784, replib, Entry# 5209, CAS# 111-87-5, 1-Octanol

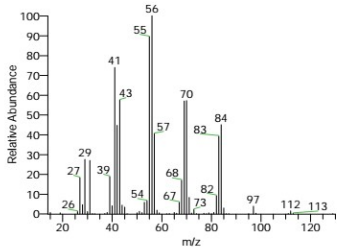

## Delta

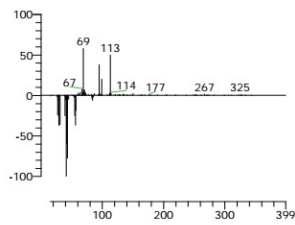

## Compound Structure

1-Octanol  
Formula C8H18O, MW 130, CAS# 111-87-5, Entry# 5209  
Octyl alcohol

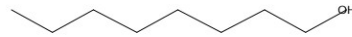

1-Octyl trifluoroacetate  
Formula C10H17F3O2, MW 226, CAS# 2561-21-9, Entry# 32070  
Octyl trifluoroacetate

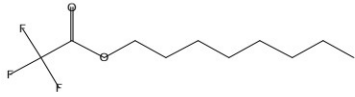

SI 696, RSI 758, replib, Entry# 1017, CAS# 111-87-5, 1-Octanol

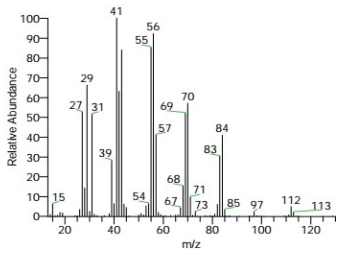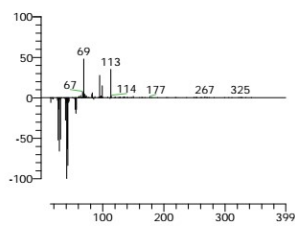

1-Octanol  
Formula C8H18O, MW 130, CAS# 111-87-5, Entry# 1017  
Octyl alcohol

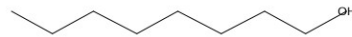



# ChemLab Technologies - GC/MS Report

Hit Spectrum

Delta

Compound Structure

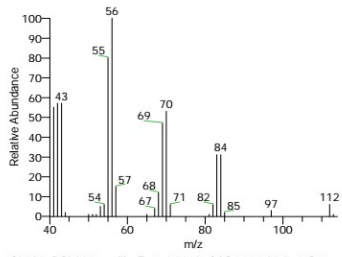

SI 686, RSI 801, replib, Entry# 5208, CAS# 111-87-5, 1-Octanol

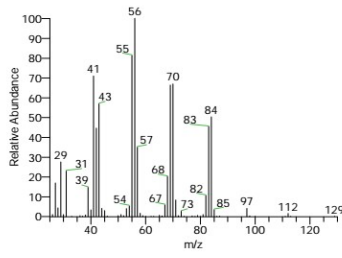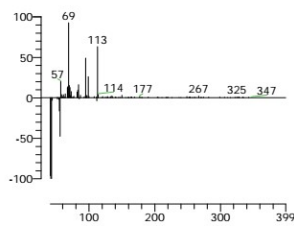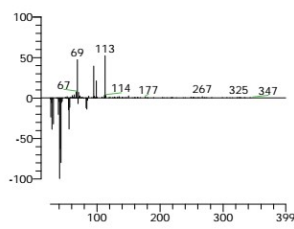

Cyclopropane, pentyl-  
Formula C8H16, MW 112, CAS# 2511-91-3, Entry# 20792  
Pentane, 1-cyclopropyl-

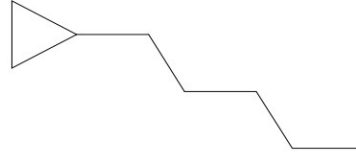

1-Octanol  
Formula C8H18O, MW 130, CAS# 111-87-5, Entry# 5208  
Octyl alcohol

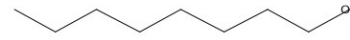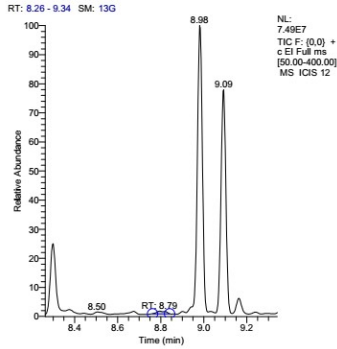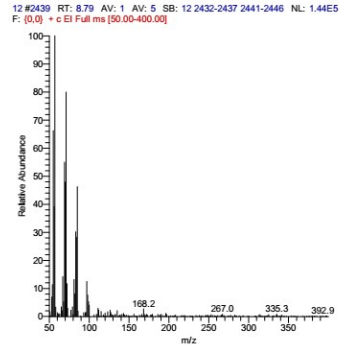

| RT   | SI  | RSI | Probability | Library | Molecular Formula | Molecular Weight |
|------|-----|-----|-------------|---------|-------------------|------------------|
| 8.79 | 774 | 825 | 7.25        | mainlib | C22H45Cl3Si       | 442              |
| 8.79 | 770 | 839 | 6.40        | mainlib | C12H26O           | 186              |
| 8.79 | 771 | 820 | 6.40        | replib  | C12H26O           | 186              |
| 8.79 | 762 | 822 | 4.65        | mainlib | C10H22O           | 158              |
| 8.79 | 761 | 781 | 4.47        | replib  | C20H40O           | 296              |



# ChemLab Technologies - GC/MS Report

Hit Spectrum

Delta

Compound Structure

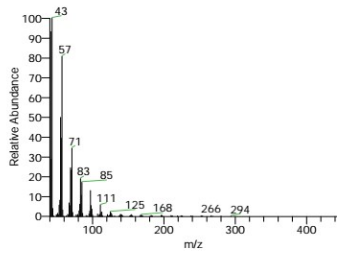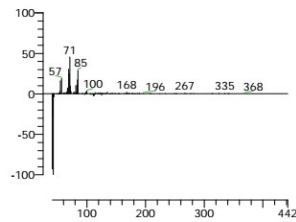

Silane, trichlorodocosyl-  
Formula C<sub>22</sub>H<sub>45</sub>Cl<sub>3</sub>Si, MW 442, CAS# 7325-84-0, Entry# 5777  
Docosyltrichlorosilane

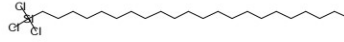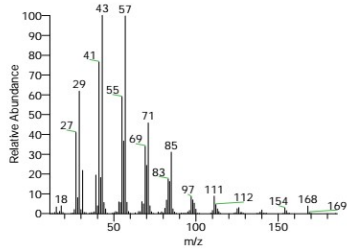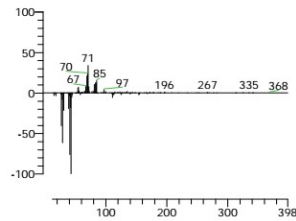

1-Octanol, 2-butyl-  
Formula C<sub>12</sub>H<sub>26</sub>O, MW 186, CAS# 3913-02-8, Entry# 2140  
2-Butyl-1-octanol

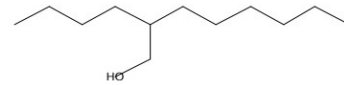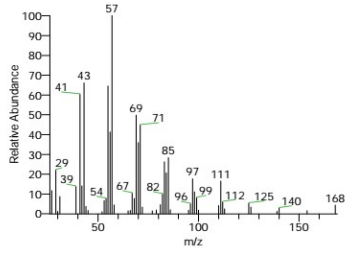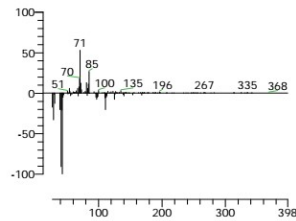

1-Octanol, 2-butyl-  
Formula C<sub>12</sub>H<sub>26</sub>O, MW 186, CAS# 3913-02-8, Entry# 22453  
2-Butyl-1-octanol

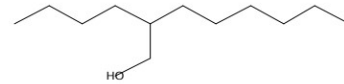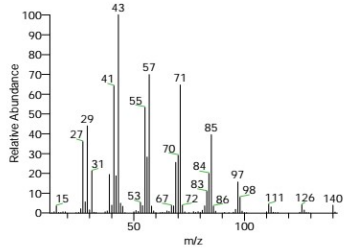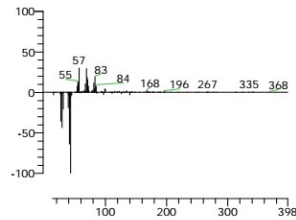

1-Heptanol, 2-propyl-  
Formula C<sub>10</sub>H<sub>22</sub>O, MW 158, CAS# 10042-59-8, Entry# 7476  
2-Propylheptanol

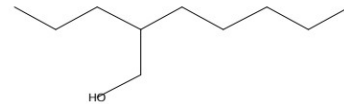



# ChemLab Technologies - GC/MS Report

Hit Spectrum

Delta

Compound Structure

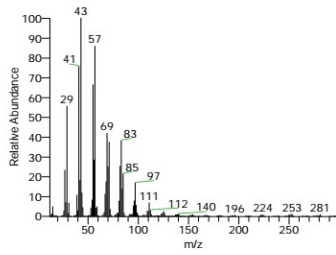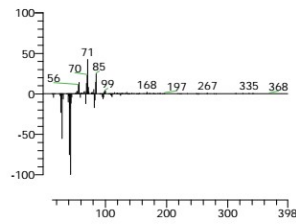

Octadecane, 1-(ethenoxy)-  
Formula C<sub>20</sub>H<sub>40</sub>O, MW 296, CAS# 930-02-9, Entry# 2167  
Ether, octadecyl vinyl

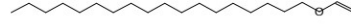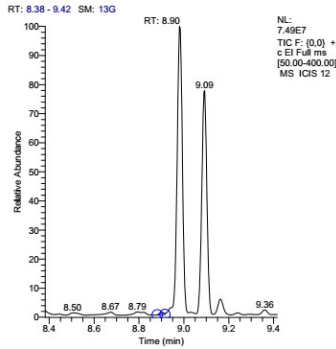

12 #2471 RT: 8.90 AV: 1 AV: 5 SB: 12 2464-2469 2473-2478 NL: 1.29E5  
F: [0.0] + c EI Full ms [50.00-400.00]

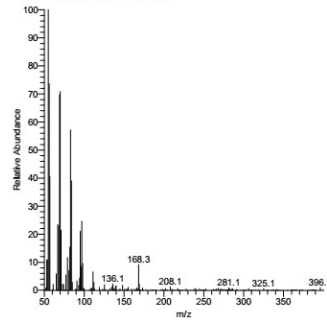

| RT   | SI  | RSI | Probability | Library | Molecular Formula               | Molecular Weight |
|------|-----|-----|-------------|---------|---------------------------------|------------------|
| 8.90 | 791 | 839 | 7.86        | replib  | C <sub>12</sub> H <sub>24</sub> | 168              |
| 8.90 | 805 | 861 | 7.86        | mainlib | C <sub>12</sub> H <sub>24</sub> | 168              |
| 8.90 | 794 | 848 | 5.39        | mainlib | C <sub>12</sub> H <sub>24</sub> | 168              |
| 8.90 | 792 | 842 | 4.97        | replib  | C <sub>12</sub> H <sub>24</sub> | 168              |
| 8.90 | 792 | 845 | 4.97        | replib  | C <sub>12</sub> H <sub>24</sub> | 168              |

Hit Spectrum

Delta

Compound Structure

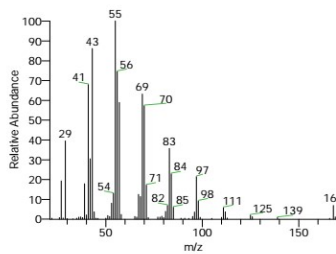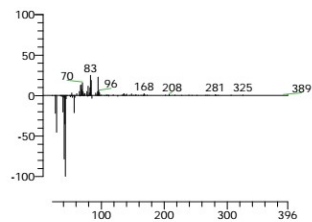

2-Dodecene, (E)-  
Formula C<sub>12</sub>H<sub>24</sub>, MW 168, CAS# 7206-13-5, Entry# 18390  
(2E)-2-Dodecene

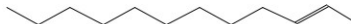



# ChemLab Technologies - GC/MS Report

Hit Spectrum

Delta

Compound Structure

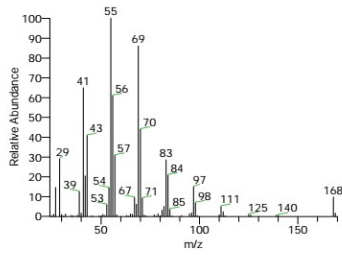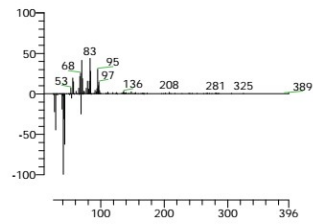

6-Dodecene, (E)-  
Formula C<sub>12</sub>H<sub>24</sub>, MW 168, CAS# 7206-17-9, Entry# 18775  
(6E)-6-Dodecene

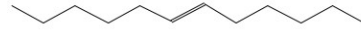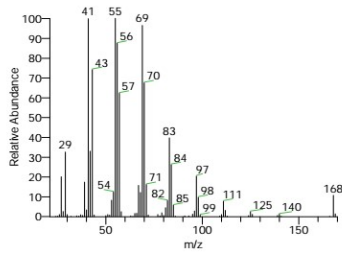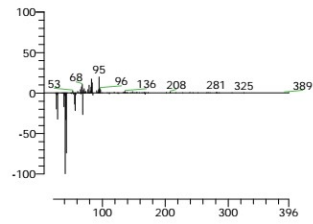

3-Dodecene, (E)-  
Formula C<sub>12</sub>H<sub>24</sub>, MW 168, CAS# 7206-14-6, Entry# 4455  
trans-3-Dodecene

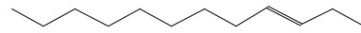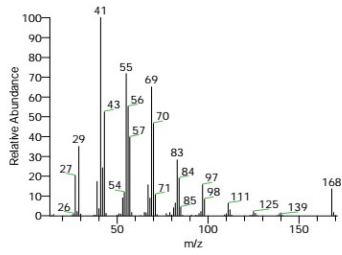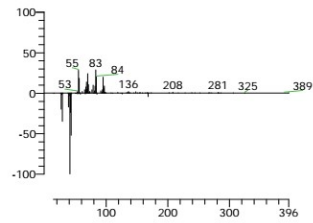

3-Dodecene, (E)-  
Formula C<sub>12</sub>H<sub>24</sub>, MW 168, CAS# 7206-14-6, Entry# 953  
trans-3-Dodecene

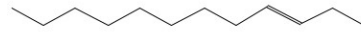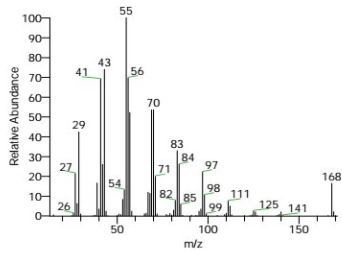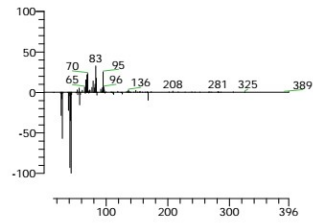

2-Dodecene, (E)-  
Formula C<sub>12</sub>H<sub>24</sub>, MW 168, CAS# 7206-13-5, Entry# 4598  
(2E)-2-Dodecene

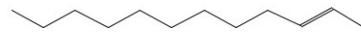





# ChemLab Technologies - GC/MS Report

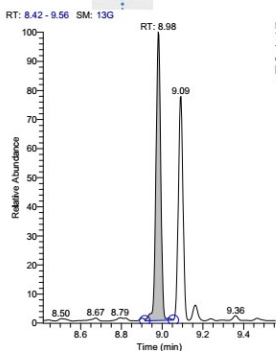

NL:  
7.49E7  
TIC F: (0.0) +  
c EI Full ms  
(50.00-400.00)  
MS ICS 12

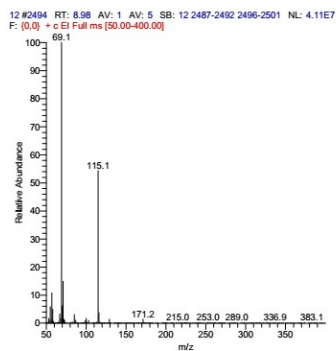

| RT   | SI  | RSI | Probability | Library | Molecular Formula | Molecular Weight |
|------|-----|-----|-------------|---------|-------------------|------------------|
| 8.98 | 709 | 716 | 40.37       | mainlib | C12H22O3          | 214              |
| 8.98 | 681 | 691 | 11.65       | mainlib | C21H42O2          | 326              |
| 8.98 | 674 | 676 | 8.93        | mainlib | C10H20O2          | 172              |
| 8.98 | 667 | 684 | 6.84        | mainlib | C9H16O3           | 172              |
| 8.98 | 658 | 664 | 4.96        | mainlib | C21H42O2          | 326              |

## Hit Spectrum

## Delta

## Compound Structure

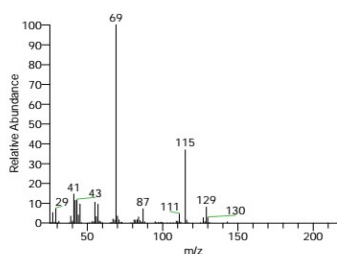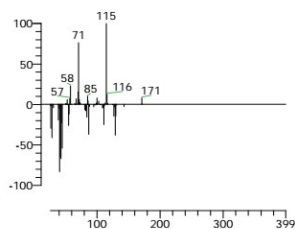

1,3-Dioxan-4-one, 2-heptyl-6-methyl  
Formula C12H22O3, MW 214, CAS# 95902-24-6, Entry# 33005  
2-Heptyl-6-methyl-1,3-dioxan-4-one #

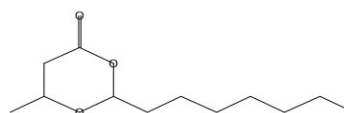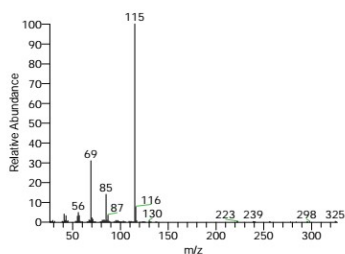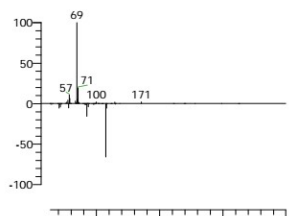

1,3-Dioxepane, 5-methyl-2-pentadecyl-  
Formula C21H42O2, MW 326, CAS# 56599-34-9, Entry# 83314  
5-Methyl-2-pentadecyl-1,3-dioxepane #

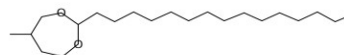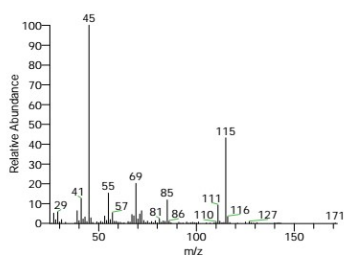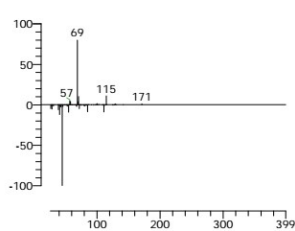

4-Methoxymethoxy-oct-2-ene  
Formula C10H20O2, MW 172, CAS# NA, Entry# 16453  
(2E)-4-(Methoxymethoxy)-2-octene #

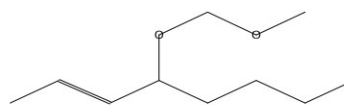



# ChemLab Technologies - GC/MS Report

Hit Spectrum

Delta

Compound Structure

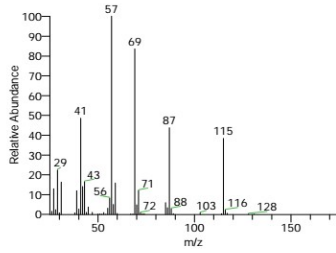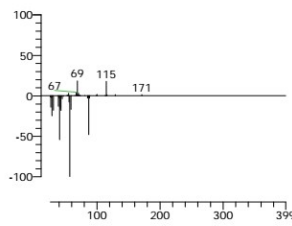

1,3-Dioxan-4-one, 2-(1,1-dimethylethyl)-5-methyl-, (2s-cis)-  
 Formula C<sub>9</sub>H<sub>16</sub>O<sub>3</sub>, MW 172, CAS# 107289-32-7, Entry# 23371  
 2-tert-Butyl-5-methyl-1,3-dioxan-4-one #

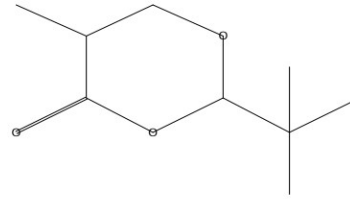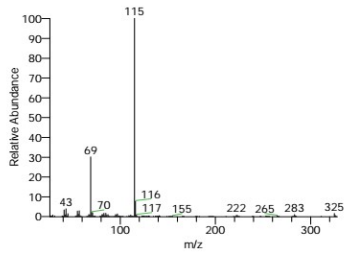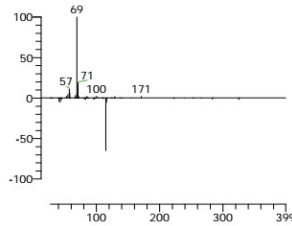

1,3-Dioxolane, 4-(1-methylethyl)-2-pentadecyl-  
 Formula C<sub>21</sub>H<sub>42</sub>O<sub>2</sub>, MW 326, CAS# 56599-35-0, Entry# 83333  
 4-Isopropyl-2-pentadecyl-1,3-dioxolane #

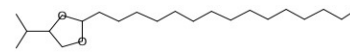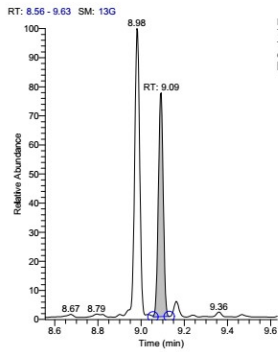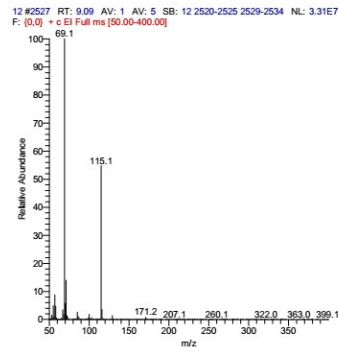

| RT   | SI  | RSI | Probability | Library | Molecular Formula                              | Molecular Weight |
|------|-----|-----|-------------|---------|------------------------------------------------|------------------|
| 9.09 | 725 | 729 | 36.14       | mainlib | C <sub>12</sub> H <sub>22</sub> O <sub>3</sub> | 214              |
| 9.09 | 711 | 809 | 22.62       | mainlib | C <sub>7</sub> H <sub>14</sub> O <sub>2</sub>  | 130              |
| 9.09 | 700 | 707 | 15.52       | mainlib | C <sub>21</sub> H <sub>42</sub> O <sub>2</sub> | 326              |
| 9.09 | 686 | 689 | 9.71        | mainlib | C <sub>21</sub> H <sub>42</sub> O <sub>2</sub> | 326              |
| 9.09 | 662 | 675 | 3.25        | mainlib | C <sub>9</sub> H <sub>16</sub> O <sub>3</sub>  | 172              |



# ChemLab Technologies - GC/MS Report

Hit Spectrum

Delta

Compound Structure

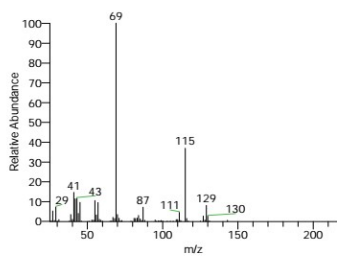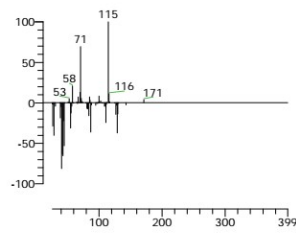

1,3-Dioxan-4-one, 2-heptyl-6-methyl  
Formula C12H22O3, MW 214, CAS# 99902-24-6, Entry# 33005  
2-Heptyl-6-methyl-1,3-dioxan-4-one #

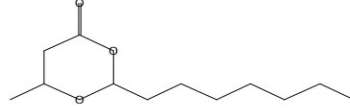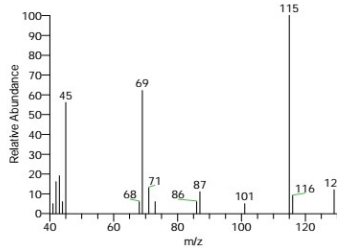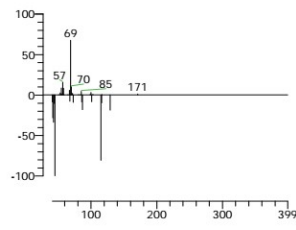

1,3-Dioxane, 2,4,6-trimethyl-, (2a,4a,6a)-  
Formula C7H14O2, MW 130, CAS# 19145-91-6, Entry# 83285  
m-Dioxane, 2,4,6-trimethyl-, cis-2,4,cis-2,6-

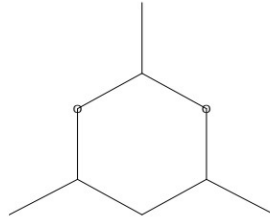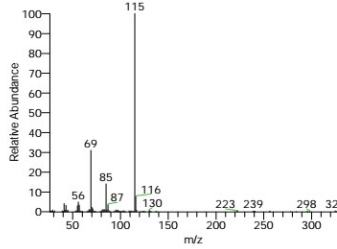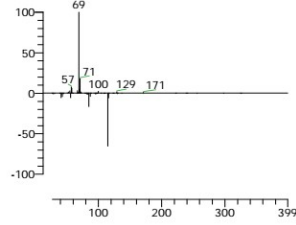

1,3-Dioxepane, 5-methyl-2-pentadecyl-  
Formula C21H42O2, MW 326, CAS# 56599-34-9, Entry# 83314  
5-Methyl-2-pentadecyl-1,3-dioxepane #

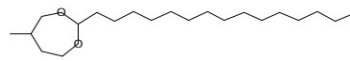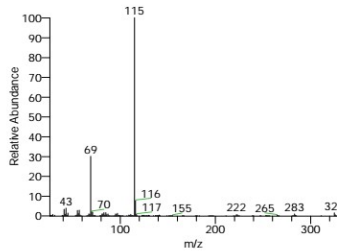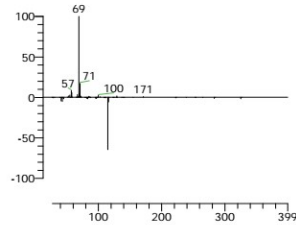

1,3-Dioxolane, 4-(1-methylethyl)-2-pentadecyl-  
Formula C21H42O2, MW 326, CAS# 56599-35-0, Entry# 83333  
4-Isopropyl-2-pentadecyl-1,3-dioxolane #

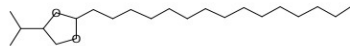



# ChemLab Technologies - GC/MS Report

Hit Spectrum

Delta

Compound Structure

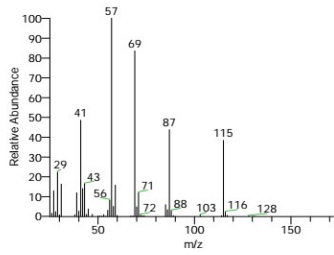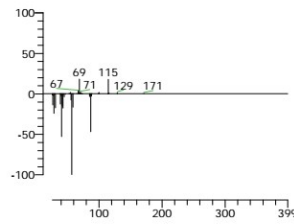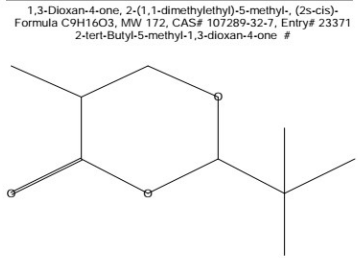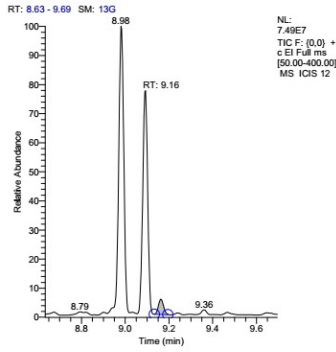

NL: 7.49E7  
TIC F: (0.0) +  
c EI Full ms  
[50.00-400.00]  
MS ICIS 12

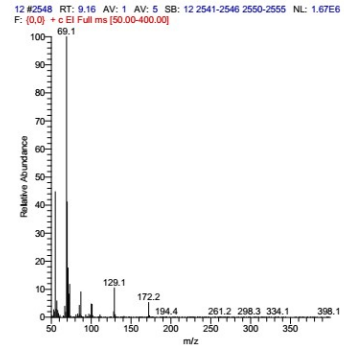

| RT   | SI  | RSI | Probability | Library | Molecular Formula                             | Molecular Weight |
|------|-----|-----|-------------|---------|-----------------------------------------------|------------------|
| 9.16 | 691 | 711 | 16.72       | mainlib | C <sub>9</sub> H <sub>20</sub> O <sub>2</sub> | 160              |
| 9.16 | 678 | 697 | 16.72       | replib  | C <sub>9</sub> H <sub>20</sub> O <sub>2</sub> | 160              |
| 9.16 | 691 | 717 | 16.72       | mainlib | C <sub>9</sub> H <sub>16</sub> O <sub>2</sub> | 156              |
| 9.16 | 673 | 911 | 8.62        | mainlib | C <sub>9</sub> H <sub>16</sub> O <sub>2</sub> | 156              |
| 9.16 | 659 | 717 | 5.40        | replib  | C <sub>6</sub> H <sub>14</sub> O <sub>2</sub> | 118              |

Hit Spectrum

Delta

Compound Structure

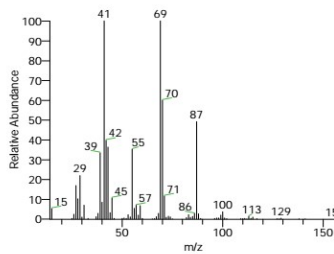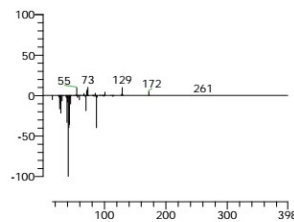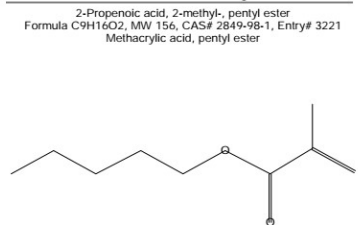



# ChemLab Technologies - GC/MS Report

Hit Spectrum

Delta

Compound Structure

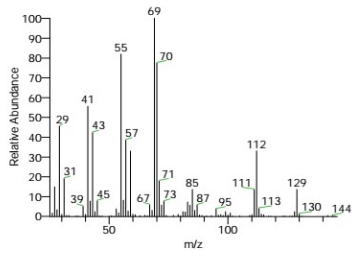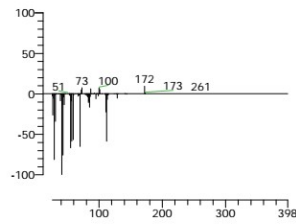

1,3-Propanediol, 2-butyl-2-ethyl-  
Formula C<sub>9</sub>H<sub>20</sub>O<sub>2</sub>, MW 160, CAS# 115-84-4, Entry# 32085  
BEP

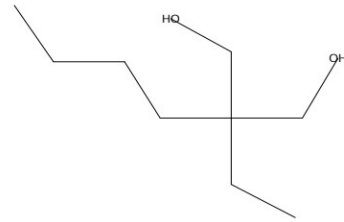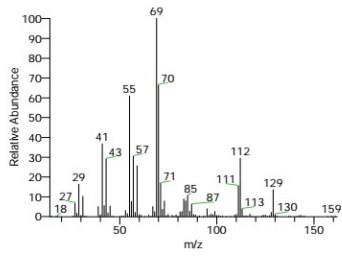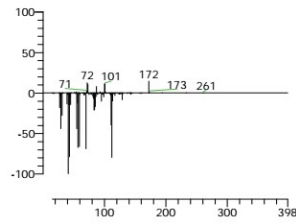

1,3-Propanediol, 2-butyl-2-ethyl-  
Formula C<sub>9</sub>H<sub>20</sub>O<sub>2</sub>, MW 160, CAS# 115-84-4, Entry# 8189  
BEP

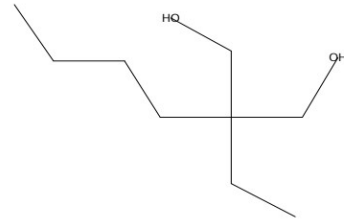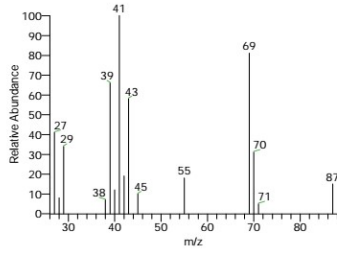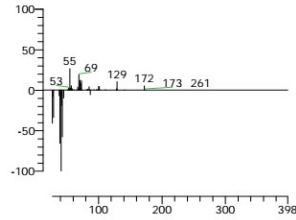

2-Propenoic acid, 2-methyl-, 1-methylbutyl ester  
Formula C<sub>9</sub>H<sub>16</sub>O<sub>2</sub>, MW 156, CAS# 94159-12-3, Entry# 3100  
1-Methylbutyl methacrylate

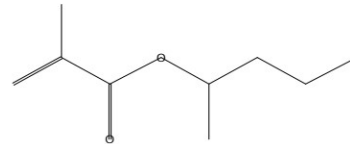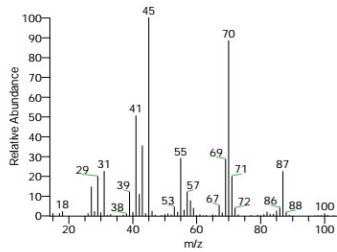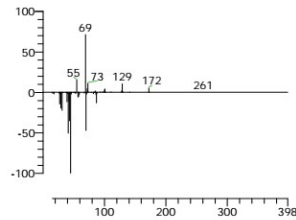

2-Ethyl-2-methyl-1,3-propanediol  
Formula C<sub>6</sub>H<sub>14</sub>O<sub>2</sub>, MW 118, CAS# 77-84-9, Entry# 3918  
2-Methyl-2-ethyl-1,3-propanediol

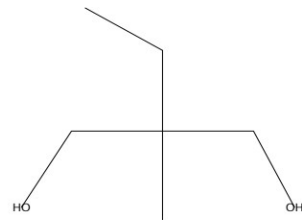



# ChemLab Technologies - GC/MS Report

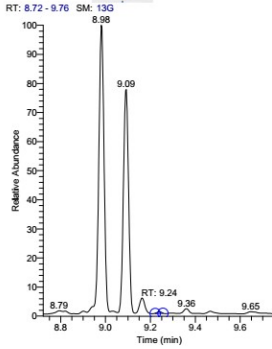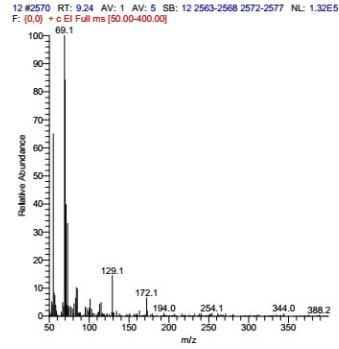

| RT   | SI  | RSI | Probability | Library | Molecular Formula | Molecular Weight |
|------|-----|-----|-------------|---------|-------------------|------------------|
| 9.24 | 642 | 725 | 21.60       | mainlib | C9H20O2           | 160              |
| 9.24 | 656 | 727 | 21.60       | replib  | C9H20O2           | 160              |
| 9.24 | 628 | 751 | 6.23        | replib  | C10H22O           | 158              |
| 9.24 | 622 | 770 | 4.90        | mainlib | C7H16O            | 116              |
| 9.24 | 621 | 749 | 4.71        | mainlib | C7H16O            | 116              |

## Hit Spectrum

## Delta

## Compound Structure

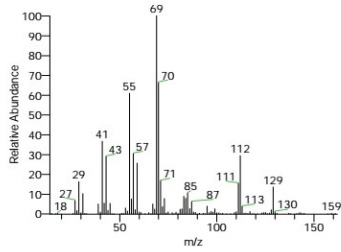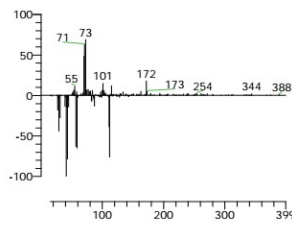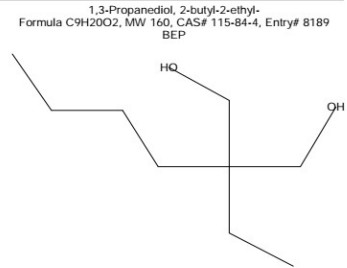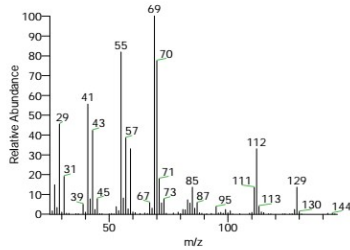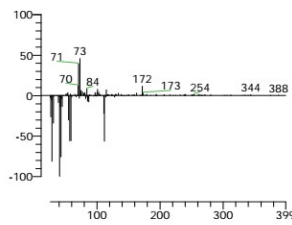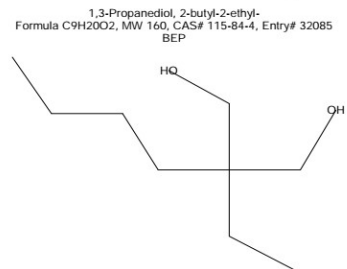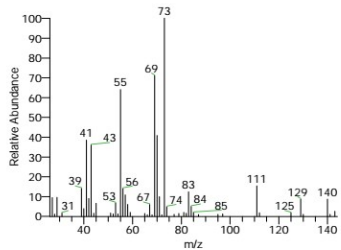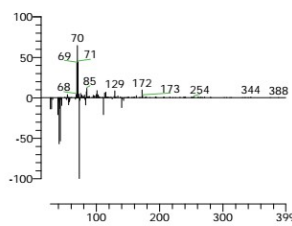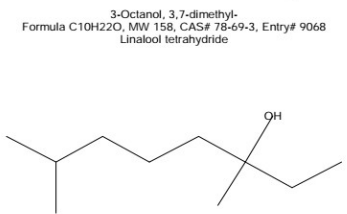



# ChemLab Technologies - GC/MS Report

Hit Spectrum

Delta

Compound Structure

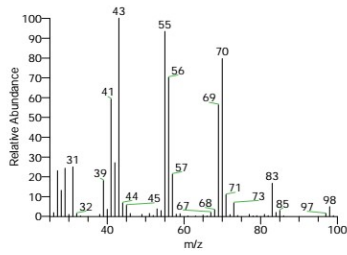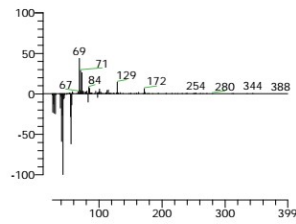

1-Hexanol, 5-methyl-5-Methyl-1-hexanol  
Formula C7H16O, MW 116, CAS# 627-98-5, Entry# 6922

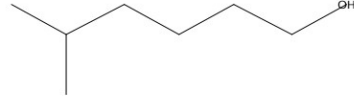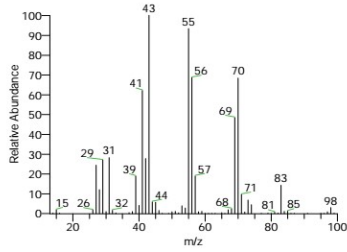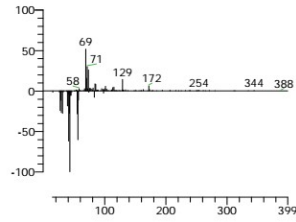

1-Hexanol, 3-methyl-3-Methyl-1-hexanol  
Formula C7H16O, MW 116, CAS# 13231-81-7, Entry# 6824

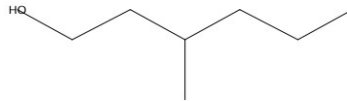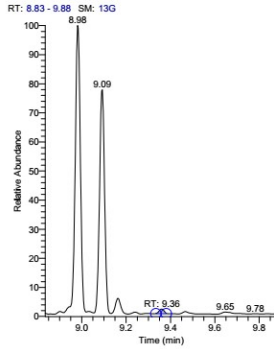

NL: 7.49E7  
TIC F: (0,0) +  
c EI Full ms  
[50.00-400.00]  
MS ICIS 12

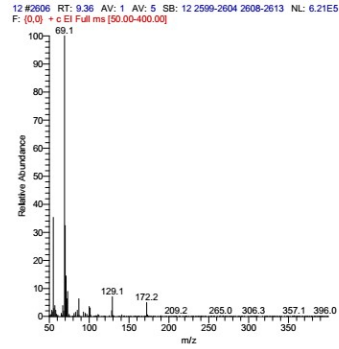

| RT   | SI  | RSI | Probability | Library | Molecular Formula | Molecular Weight |
|------|-----|-----|-------------|---------|-------------------|------------------|
| 9.36 | 685 | 716 | 13.92       | mainlib | C9H16O2           | 156              |
| 9.36 | 684 | 791 | 13.38       | mainlib | C9H16O2           | 156              |
| 9.36 | 679 | 903 | 10.78       | mainlib | C9H16O2           | 156              |
| 9.36 | 664 | 816 | 6.53        | mainlib | C5H10O2S          | 134              |
| 9.36 | 660 | 684 | 5.52        | mainlib | C9H20O2           | 160              |



# ChemLab Technologies - GC/MS Report

Hit Spectrum

Delta

Compound Structure

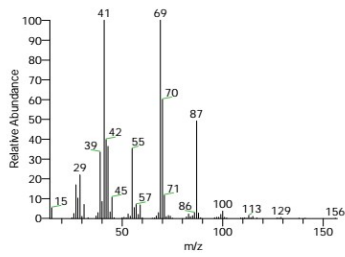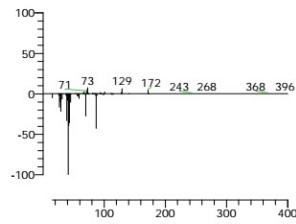

2-Propenoic acid, 2-methyl-, pentyl ester  
Formula C9H16O2, MW 156, CAS# 2849-98-1, Entry# 3221  
Methacrylic acid, pentyl ester

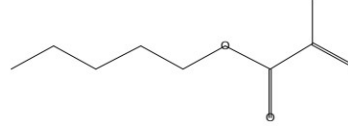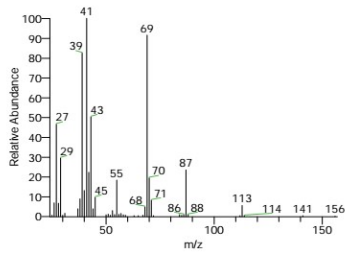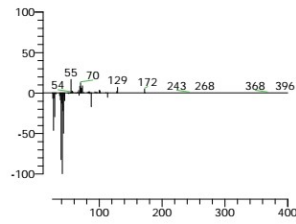

Cyclopropanecarboxylic acid, 2-pentyl ester  
Formula C9H16O2, MW 156, CAS# NA, Entry# 3093  
1-Methylbutyl cyclopropanecarboxylate #

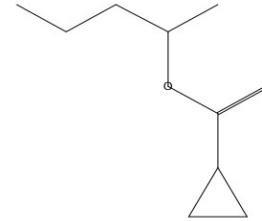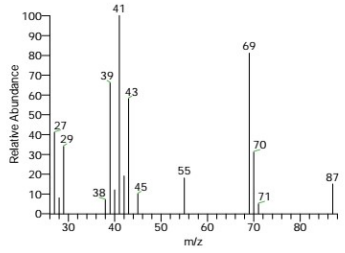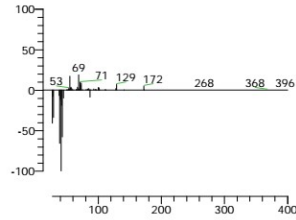

2-Propenoic acid, 2-methyl-, 1-methylbutyl ester  
Formula C9H16O2, MW 156, CAS# 94159-12-3, Entry# 3100  
1-Methylbutyl methacrylate

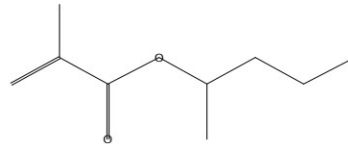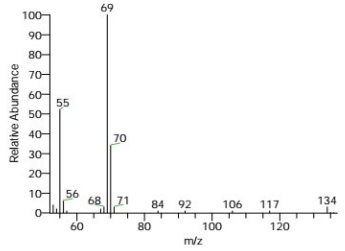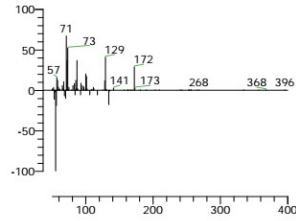

2-Methylthiolane, S,S-dioxide  
Formula C5H10O2S, MW 134, CAS# 1003-46-9, Entry# 32086  
2-Methyltetrahydrothiophene 1,1-dioxide #

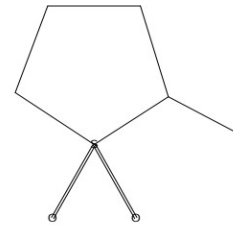





# ChemLab Technologies - GC/MS Report

Hit Spectrum

Delta

Compound Structure

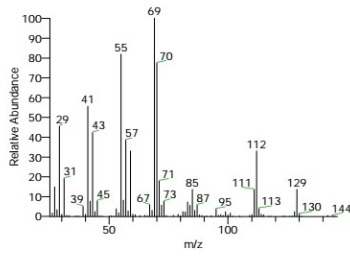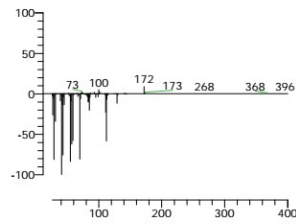

1,3-Propanediol, 2-butyl-2-ethyl-  
Formula C<sub>9</sub>H<sub>20</sub>O<sub>2</sub>, MW 160, CAS# 115-84-4, Entry# 32085  
BEP

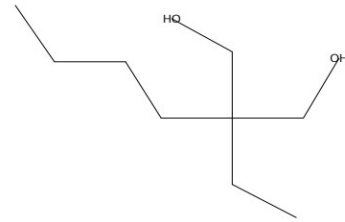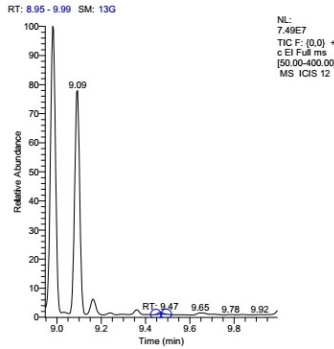

NL: 7.49E7  
TIC F: (0.0) +  
c EI Full ms  
[50.00-400.00]  
MS ICIS 12

12 #2637 RT: 9.47 AV: 1 AV: 5 SB: 12 2630-2636 2639-2644 NL: 7.87E4  
F: (0.0) + c EI Full ms [50.00-400.00]

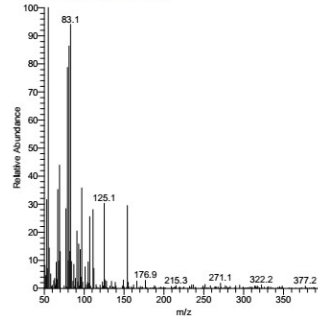

| RT   | SI  | RSI | Probability | Library | Molecular Formula                 | Molecular Weight |
|------|-----|-----|-------------|---------|-----------------------------------|------------------|
| 9.47 | 707 | 788 | 66.41       | replib  | C <sub>10</sub> H <sub>18</sub> O | 154              |
| 9.47 | 745 | 814 | 66.41       | mainlib | C <sub>10</sub> H <sub>18</sub> O | 154              |
| 9.47 | 679 | 752 | 10.48       | mainlib | C <sub>10</sub> H <sub>18</sub> O | 154              |
| 9.47 | 628 | 778 | 2.11        | mainlib | C <sub>7</sub> H <sub>12</sub> O  | 112              |
| 9.47 | 621 | 697 | 1.61        | mainlib | C <sub>10</sub> H <sub>18</sub> O | 154              |

Hit Spectrum

Delta

Compound Structure

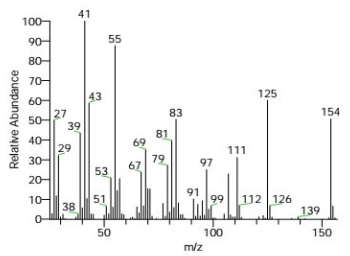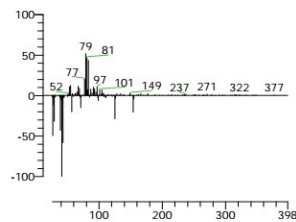

2-Heptenal, 2-propyl-  
Formula C<sub>10</sub>H<sub>18</sub>O, MW 154, CAS# 34880-43-8, Entry# 2744  
2-Propyl-2-heptenal

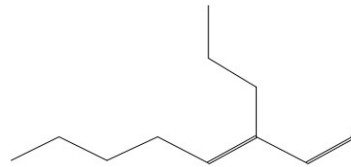



# ChemLab Technologies - GC/MS Report

Hit Spectrum

Delta

Compound Structure

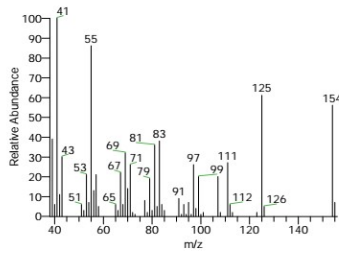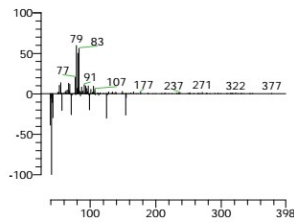

2-Heptenal, 2-propyl-  
Formula C<sub>10</sub>H<sub>18</sub>O, MW 154, CAS# 34880-43-8, Entry# 992  
2-Propyl-2-heptenal

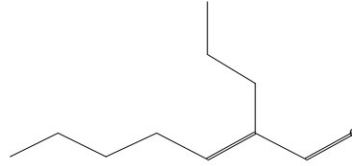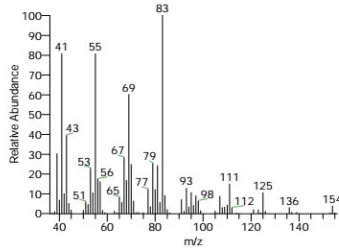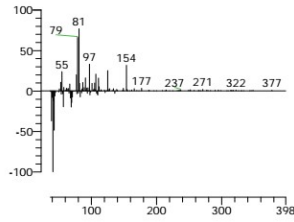

2,4-Pentadien-1-ol, 3-pentyl-, (2Z)-  
Formula C<sub>10</sub>H<sub>18</sub>O, MW 154, CAS# NA, Entry# 47252  
(2E)-3-Pentyl-2,4-pentadien-1-ol #

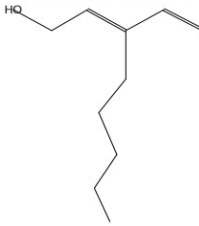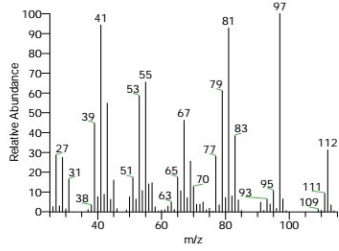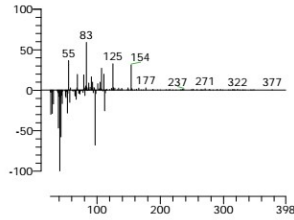

4-Methyl-2,3-hexadien-1-ol  
Formula C<sub>7</sub>H<sub>12</sub>O, MW 112, CAS# NA, Entry# 63336

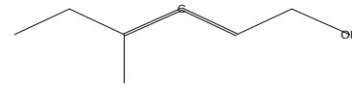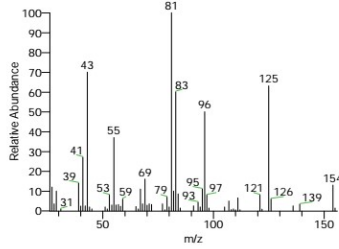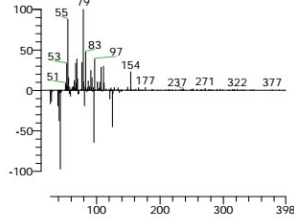

2-Oxabicyclo[2.2.1]heptane, 1,3,3,7-tetramethyl-, (1R,4S,7S)-(+)-  
Formula C<sub>10</sub>H<sub>18</sub>O, MW 154, CAS# 15404-57-6, Entry# 45421  
1,3,3,7-Tetramethyl-2-oxabicyclo[2.2.1]heptane #

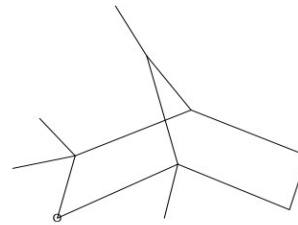

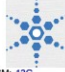

# ChemLab Technologies - GC/MS Report

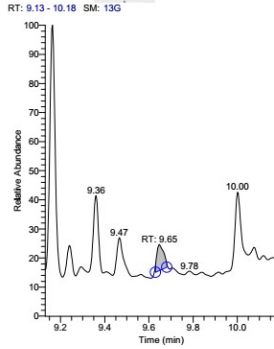

NL:  
4.66E6  
TIC F: (0.0) +  
c EI Full ms  
(50.00-400.00)  
MS ICIS 12

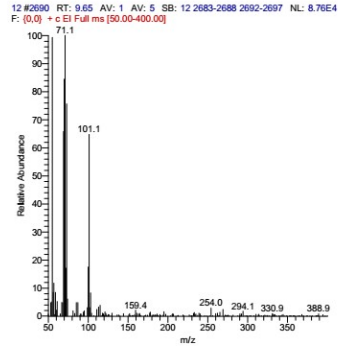

| RT   | SI  | RSI | Probability | Library | Molecular Formula | Molecular Weight |
|------|-----|-----|-------------|---------|-------------------|------------------|
| 9.65 | 638 | 781 | 26.01       | mainlib | C9H20O            | 144              |
| 9.65 | 616 | 749 | 10.28       | mainlib | C6H12O2           | 116              |
| 9.65 | 597 | 695 | 4.99        | mainlib | C10H22O           | 158              |
| 9.65 | 596 | 658 | 4.79        | replib  | C9H18O2           | 158              |
| 9.65 | 594 | 717 | 4.42        | replib  | C6H14O            | 102              |

## Hit Spectrum

## Delta

## Compound Structure

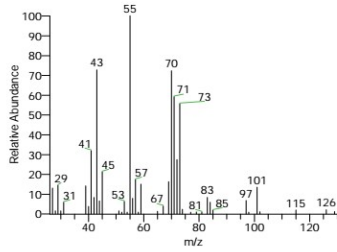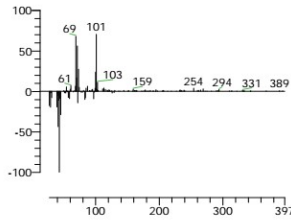

3,3-Dimethyl-4-heptanol  
Formula C9H20O, MW 144, CAS# 19549-78-1, Entry# 18430

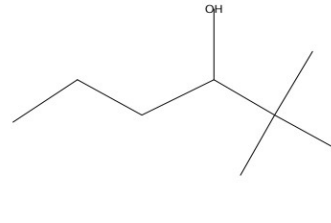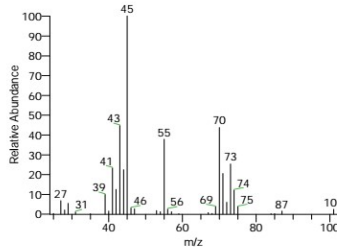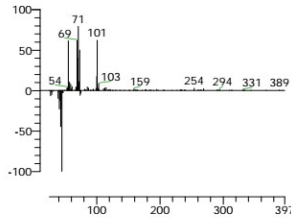

Formic acid, 3-methylbut-2-yl ester  
Formula C6H12O2, MW 116, CAS# NA, Entry# 15819

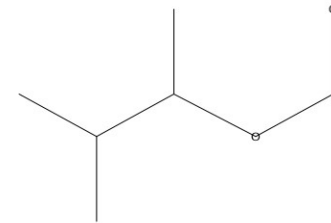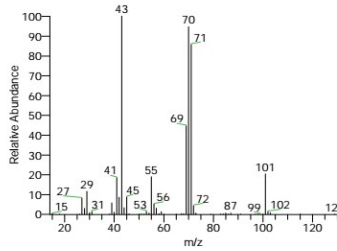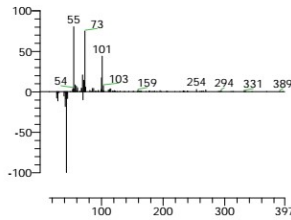

Butane, 1,1'-oxybis[3-methyl-Isopentyl ether]  
Formula C10H22O, MW 158, CAS# 544-01-4, Entry# 8222

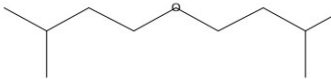



# ChemLab Technologies - GC/MS Report

Hit Spectrum

Delta

Compound Structure

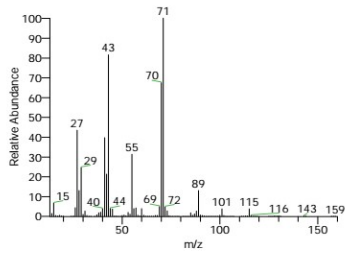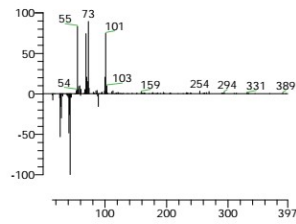

Butanoic acid, pentyl ester  
 Formula C<sub>9</sub>H<sub>18</sub>O<sub>2</sub>, MW 158, CAS# 540-18-1, Entry# 8595  
 Butyric acid, pentyl ester

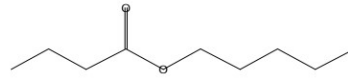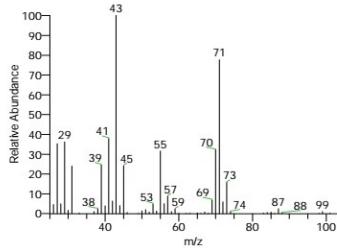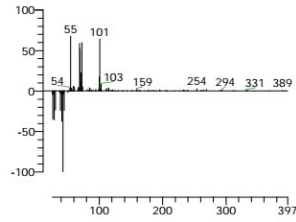

1-Butanol, 2,2-dimethyl-  
 Formula C<sub>6</sub>H<sub>14</sub>O, MW 102, CAS# 1185-33-7, Entry# 2502  
 2,2-Dimethyl-1-butanol

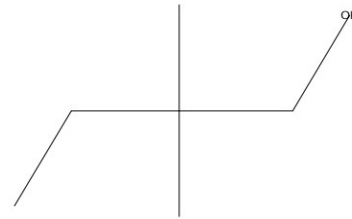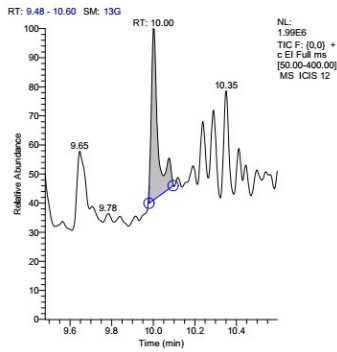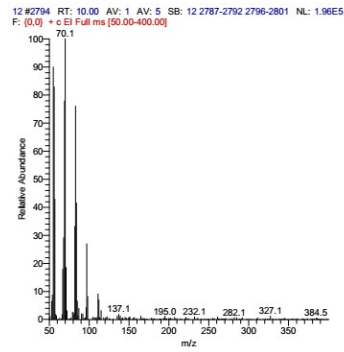

| RT    | SI  | RSI | Probability | Library  | Molecular Formula                 | Molecular Weight |
|-------|-----|-----|-------------|----------|-----------------------------------|------------------|
| 10.00 | 820 | 890 | 9.20        | mainlib  | C <sub>11</sub> H <sub>24</sub> O | 172              |
| 10.00 | 820 | 890 | 9.20        | NISTDEMO | C <sub>11</sub> H <sub>24</sub> O | 172              |
| 10.00 | 802 | 859 | 7.05        | replib   | C <sub>10</sub> H <sub>22</sub> O | 158              |
| 10.00 | 813 | 877 | 7.05        | replib   | C <sub>10</sub> H <sub>22</sub> O | 158              |
| 10.00 | 802 | 865 | 4.83        | mainlib  | C <sub>11</sub> H <sub>22</sub>   | 154              |



# ChemLab Technologies - GC/MS Report

Hit Spectrum

Delta

Compound Structure

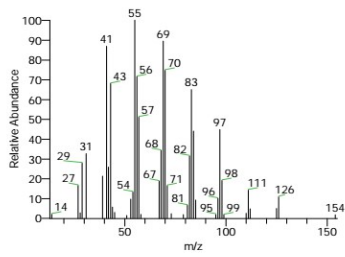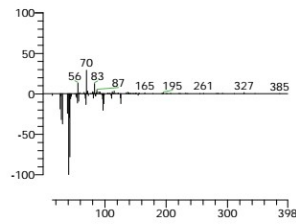

1-Undecanol  
Formula C<sub>11</sub>H<sub>24</sub>O, MW 172, CAS# 112-42-5, Entry# 409  
Undecyl alcohol

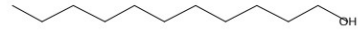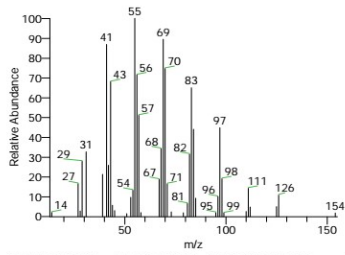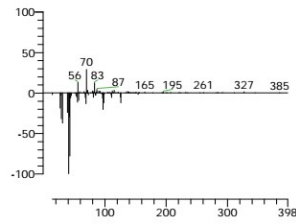

1-Undecanol  
Formula C<sub>11</sub>H<sub>24</sub>O, MW 172, CAS# 112-42-5, Entry# 18777  
Undecyl alcohol

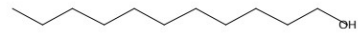

SI 813, RSI 877, replib, Entry# 2011, CAS# 112-30-1, 1-Decanol

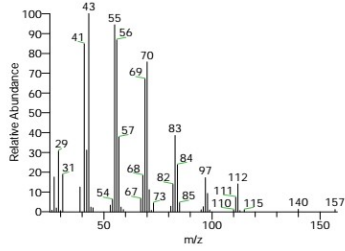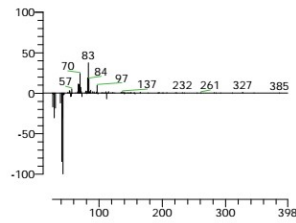

1-Decanol  
Formula C<sub>10</sub>H<sub>22</sub>O, MW 158, CAS# 112-30-1, Entry# 2011  
Decyl alcohol

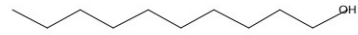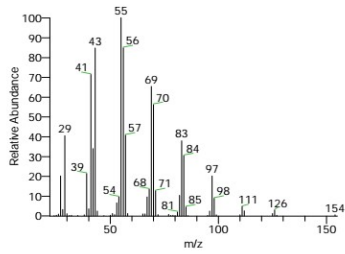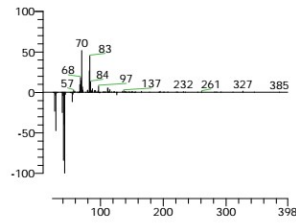

Cyclopropane, octyl-  
Formula C<sub>11</sub>H<sub>22</sub>, MW 154, CAS# 1472-09-9, Entry# 18565  
Octane, 1-cyclopropyl-

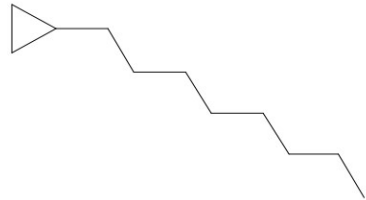



# ChemLab Technologies - GC/MS Report

SI 802, RSI 859, replib, Entry# 2010, CAS# 112-30-1, 1-Decanol

Delta

Compound Structure

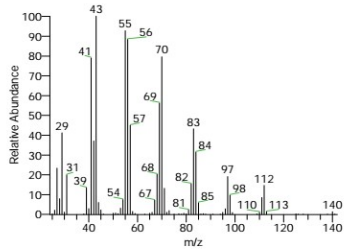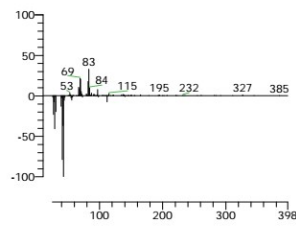

1-Decanol  
Formula C<sub>10</sub>H<sub>22</sub>O, MW 158, CAS# 112-30-1, Entry# 2010  
Decyl alcohol

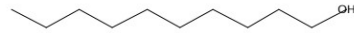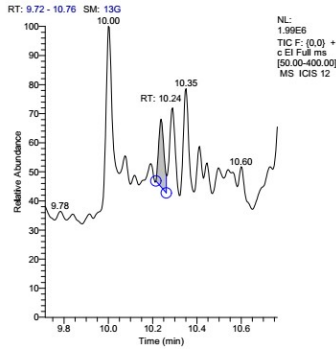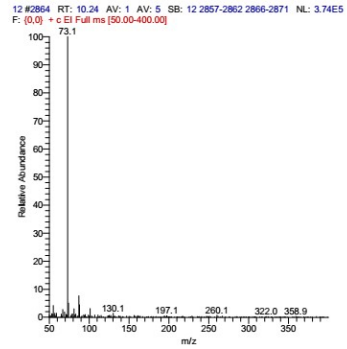

| RT    | SI  | RSI | Probability | Library  | Molecular Formula                              | Molecular Weight |
|-------|-----|-----|-------------|----------|------------------------------------------------|------------------|
| 10.24 | 701 | 761 | 20.81       | mainlib  | C <sub>18</sub> H <sub>36</sub> O <sub>2</sub> | 284              |
| 10.24 | 680 | 995 | 8.85        | replib   | C <sub>3</sub> H <sub>6</sub> O <sub>2</sub>   | 74               |
| 10.24 | 667 | 874 | 5.72        | mainlib  | C <sub>6</sub> H <sub>12</sub> O <sub>2</sub>  | 116              |
| 10.24 | 664 | 861 | 5.05        | mainlib  | C <sub>6</sub> H <sub>12</sub> O <sub>2</sub>  | 116              |
| 10.24 | 659 | 816 | 4.07        | NISTDEMO | C <sub>5</sub> H <sub>12</sub> O               | 88               |

Hit Spectrum

Delta

Compound Structure

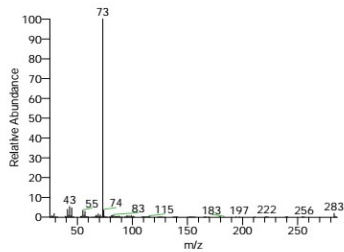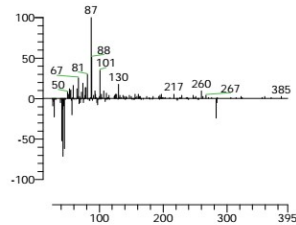

1,3-Dioxolane, 2-pentadecyl-  
Formula C<sub>18</sub>H<sub>36</sub>O<sub>2</sub>, MW 284, CAS# 4360-57-0, Entry# 36955  
Hexadecanal cyclic ethylene acetal

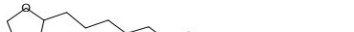



# ChemLab Technologies - GC/MS Report

Hit Spectrum

Delta

Compound Structure

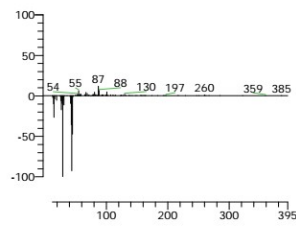

1,3-Dioxolane  
Formula C3H6O2, MW 74, CAS# 646-06-0, Entry# 8899  
Ethylene glycol formal

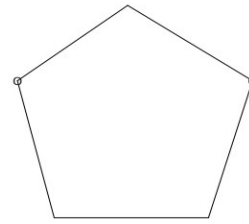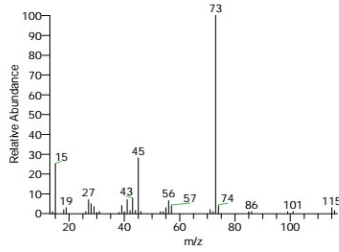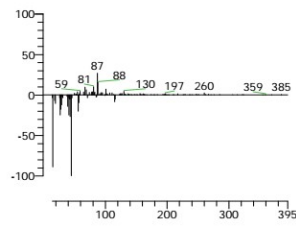

1,3-Dioxolane, 2-(1-methylethyl)-  
Formula C6H12O2, MW 116, CAS# 822-83-3, Entry# 37058  
1,3-Dioxolane, 2-isopropyl-

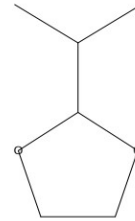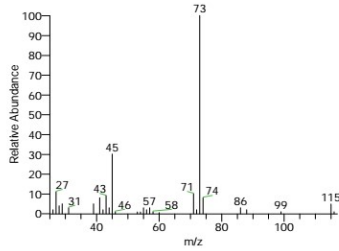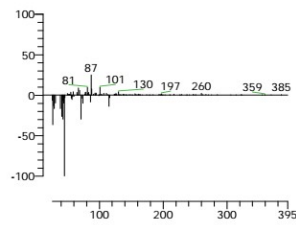

1,3-Dioxolane, 2-propyl-  
Formula C6H12O2, MW 116, CAS# 3390-13-4, Entry# 37065  
Butanal, cyclic 1,2-ethanediy acetal

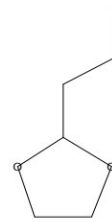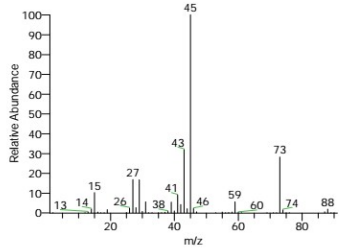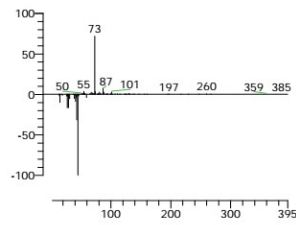

Propane, 2-ethoxy-  
Formula C5H12O, MW 88, CAS# 625-54-7, Entry# 1293  
Ether, ethyl isopropyl

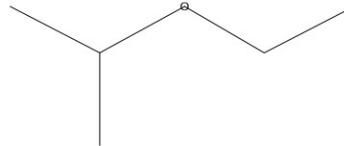

# ChemLab Technologies - GC/MS Report

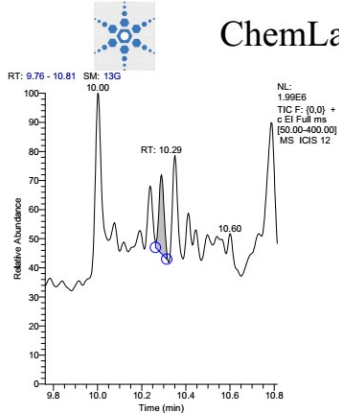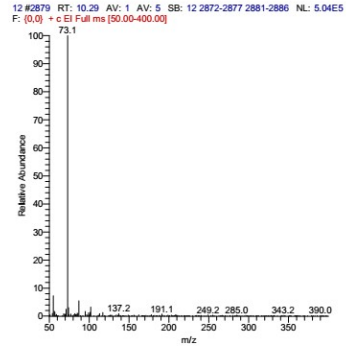

| RT    | SI  | RSI | Probability | Library  | Molecular Formula | Molecular Weight |
|-------|-----|-----|-------------|----------|-------------------|------------------|
| 10.29 | 727 | 814 | 12.79       | mainlib  | C10H20O2          | 172              |
| 10.29 | 727 | 814 | 12.79       | NISTDEMO | C10H20O2          | 172              |
| 10.29 | 713 | 751 | 8.01        | mainlib  | C18H36O2          | 284              |
| 10.29 | 710 | 804 | 7.07        | mainlib  | C6H10O2           | 114              |
| 10.29 | 710 | 921 | 7.07        | mainlib  | C6H12O2           | 116              |

| Hit Spectrum | Delta | Compound Structure                                                                                                                    |
|--------------|-------|---------------------------------------------------------------------------------------------------------------------------------------|
|              |       | <p>1,3-Dioxolane, 2-heptyl-<br/>Formula C10H20O2, MW 172, CAS# 4359-57-3, Entry# 1394<br/>2-Heptyl-1,3-dioxolane #</p>                |
|              |       | <p>1,3-Dioxolane, 2-heptyl-<br/>Formula C10H20O2, MW 172, CAS# 4359-57-3, Entry# 37083<br/>2-Heptyl-1,3-dioxolane #</p>               |
|              |       | <p>1,3-Dioxolane, 2-pentadecyl-<br/>Formula C18H36O2, MW 284, CAS# 4360-57-0, Entry# 36955<br/>Hexadecanal cyclic ethylene acetal</p> |





# ChemLab Technologies - GC/MS Report

Hit Spectrum

Delta

Compound Structure

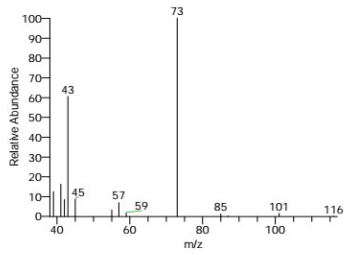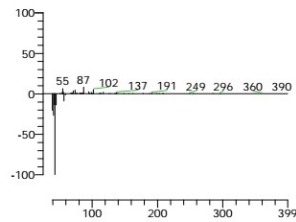

2-Butanone, 3-methoxy-3-methyl-  
 Formula C<sub>6</sub>H<sub>12</sub>O<sub>2</sub>, MW 116, CAS# 36687-98-6, Entry# 36944  
 3-Methoxy-3-methyl-2-butanone #

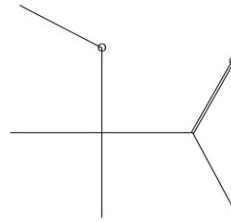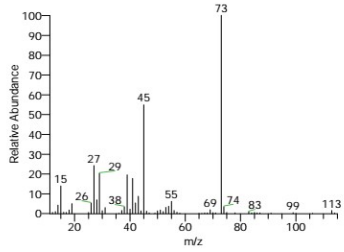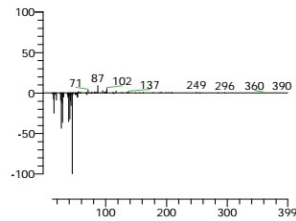

1,3-Dioxolane, 2-(2-propenyl)-  
 Formula C<sub>6</sub>H<sub>10</sub>O<sub>2</sub>, MW 114, CAS# 38653-49-5, Entry# 37063  
 2-Allyl-1,3-dioxolane #

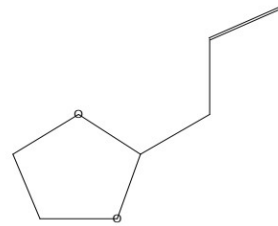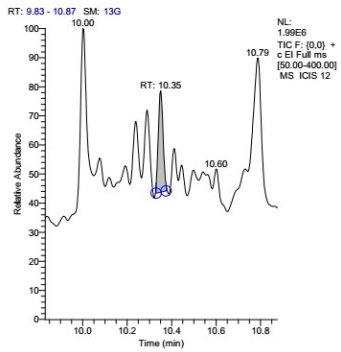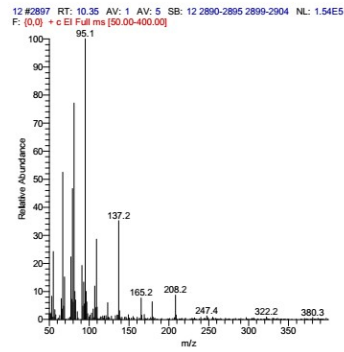

| RT    | SI  | RSI | Probability | Library | Molecular Formula                  | Molecular Weight |
|-------|-----|-----|-------------|---------|------------------------------------|------------------|
| 10.35 | 717 | 822 | 11.11       | replib  | C <sub>10</sub> H <sub>16</sub> O  | 152              |
| 10.35 | 702 | 774 | 6.73        | mainlib | C <sub>12</sub> H <sub>22</sub>    | 166              |
| 10.35 | 701 | 795 | 6.47        | mainlib | C <sub>10</sub> H <sub>16</sub> O  | 152              |
| 10.35 | 696 | 774 | 5.21        | mainlib | C <sub>10</sub> H <sub>17</sub> Br | 216              |
| 10.35 | 693 | 756 | 4.60        | mainlib | C <sub>12</sub> H <sub>22</sub>    | 166              |



# ChemLab Technologies - GC/MS Report

Hit Spectrum

Delta

Compound Structure

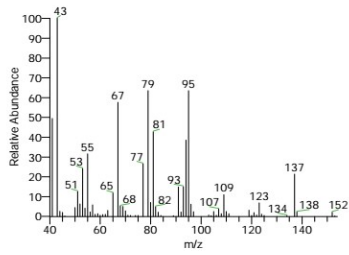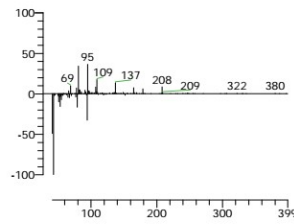

Artemiseole  
Formula C<sub>10</sub>H<sub>16</sub>O, MW 152, CAS# 60485-46-3, Entry# 2699  
1,6,6-Trimethyl-4-ethenyl-exo-2-oxabicyclo[3.1.0] hexane

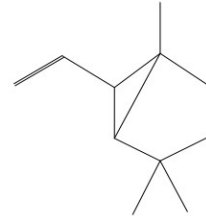

3,5-Octadiene, 4,5-diethyl-  
Formula C<sub>12</sub>H<sub>22</sub>, MW 166, CAS# 67652-84-0, Entry# 62027  
4,5-Diethyl-3,5-octadiene

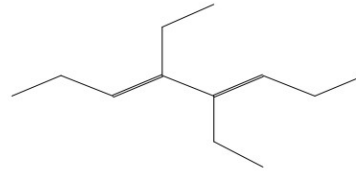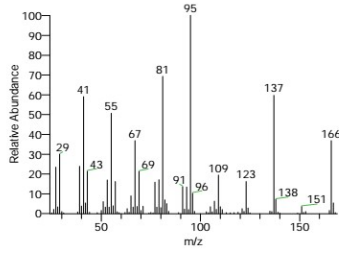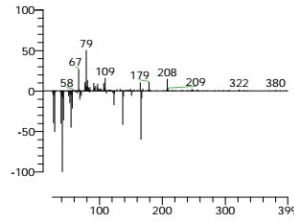

Santolina epoxide  
Formula C<sub>10</sub>H<sub>16</sub>O, MW 152, CAS# 60485-45-2, Entry# 61795  
2-Methyl-2-(3-methyl-1-vinyl-2-butenyl)oxirane #

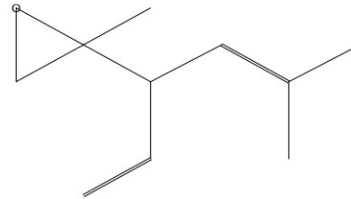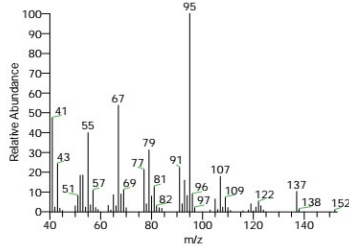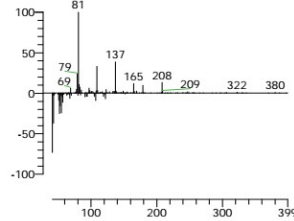

Bicyclo[6.1.0]nonane, 9-bromo-9-methyl-, (1a,8a,9a)-  
Formula C<sub>10</sub>H<sub>17</sub>Br, MW 216, CAS# 59474-03-2, Entry# 45957  
9-Bromo-9-methylbicyclo[6.1.0]nonane #

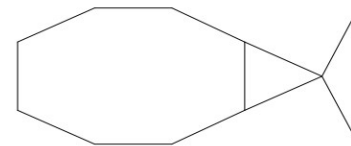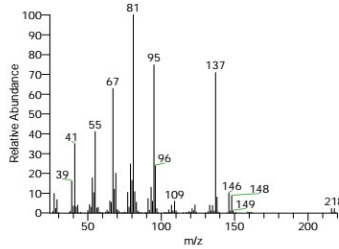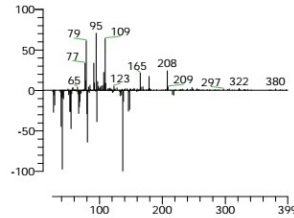



# ChemLab Technologies - GC/MS Report

Hit Spectrum

Delta

Compound Structure

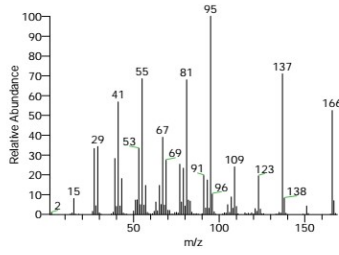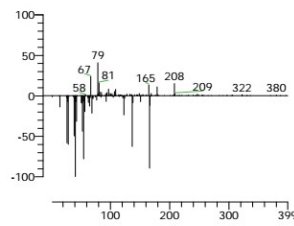

3,5-Octadiene, 4,5-diethyl-, (E,Z)-  
Formula C<sub>12</sub>H<sub>22</sub>, MW 166, CAS# 21293-02-7, Entry# 62407  
cis,trans-4,5-Diethyl-3,5-octadiene

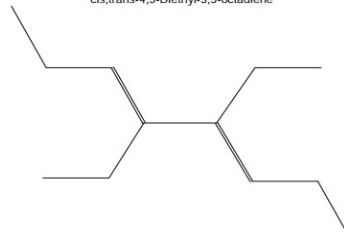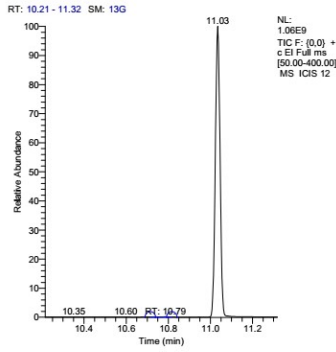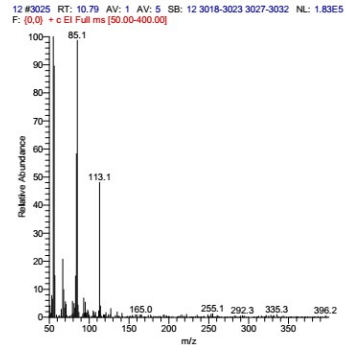

| RT    | SI  | RSI | Probability | Library | Molecular Formula                              | Molecular Weight |
|-------|-----|-----|-------------|---------|------------------------------------------------|------------------|
| 10.79 | 693 | 797 | 65.18       | replib  | C <sub>6</sub> H <sub>11</sub> NO              | 113              |
| 10.79 | 725 | 868 | 65.18       | replib  | C <sub>6</sub> H <sub>11</sub> NO              | 113              |
| 10.79 | 756 | 899 | 65.18       | replib  | C <sub>6</sub> H <sub>11</sub> NO              | 113              |
| 10.79 | 730 | 819 | 19.53       | mainlib | C <sub>10</sub> H <sub>18</sub> O <sub>2</sub> | 170              |
| 10.79 | 701 | 773 | 5.53        | mainlib | C <sub>12</sub> H <sub>22</sub> O <sub>2</sub> | 198              |

Hit Spectrum

Delta

Compound Structure

SI 756, RSI 899, replib, Entry# 424, CAS# 105-60-2, Caprolactam

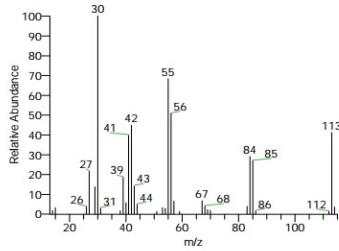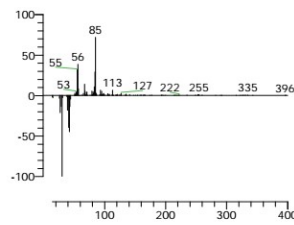

Caprolactam  
Formula C<sub>6</sub>H<sub>11</sub>NO, MW 113, CAS# 105-60-2, Entry# 424  
2H-Azepin-2-one, hexahydro-

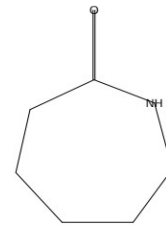



# ChemLab Technologies - GC/MS Report

Hit Spectrum

Delta

Compound Structure

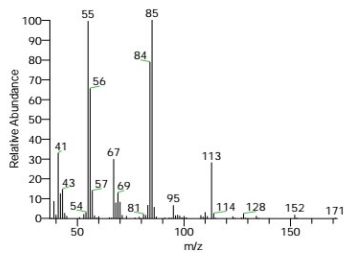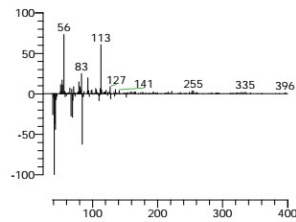

2-Oxepanone, 7-butyl-7-butyl-2-oxepanone  
Formula C<sub>10</sub>H<sub>18</sub>O<sub>2</sub>, MW 170, CAS# 5579-78-2, Entry# 49926

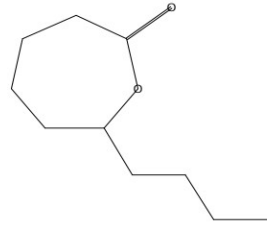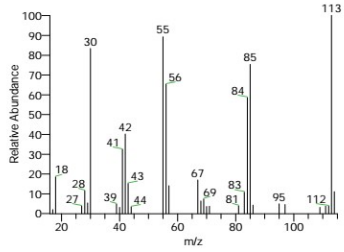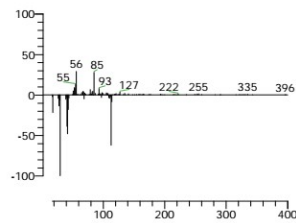

Caprolactam  
Formula C<sub>6</sub>H<sub>11</sub>NO, MW 113, CAS# 105-60-2, Entry# 16493

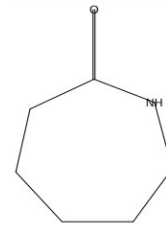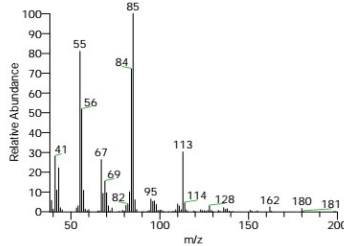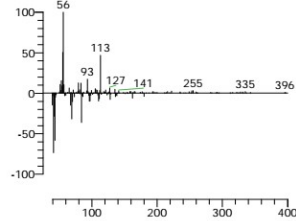

2-Oxepanone, 7-hexyl-7-hexyl-2-oxepanone  
Formula C<sub>12</sub>H<sub>22</sub>O<sub>2</sub>, MW 198, CAS# 16429-21-3, Entry# 49927

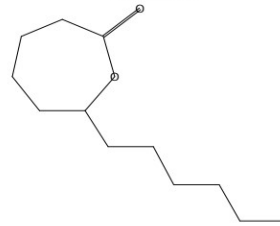

SI 693, RSI 797, replib, Entry# 4669, CAS# 105-60-2, Caprolactam

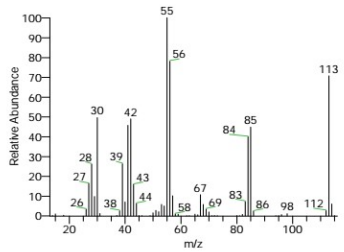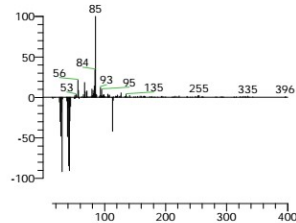

Caprolactam  
Formula C<sub>6</sub>H<sub>11</sub>NO, MW 113, CAS# 105-60-2, Entry# 4669

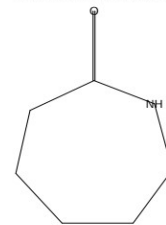

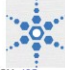

# ChemLab Technologies - GC/MS Report

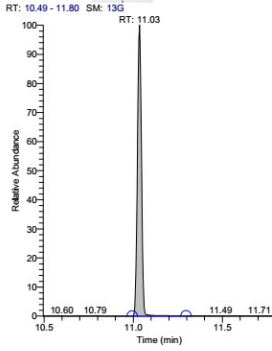

NL: 1.06E9  
TIC F: (0.0) +  
c EI Full ms  
(50.00-400.00)  
MS ICS 12

12 #3098 RT: 11.03 AV: 1 AV: 5 SB: 12 3091-3096 3100-3105 NL: 1.66E8  
F: (0.0) + c EI Full ms (50.00-400.00)

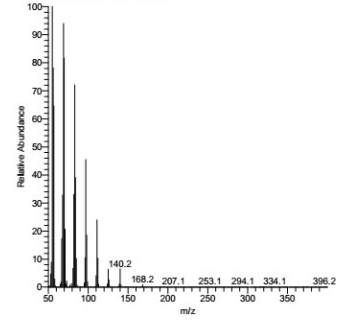

| RT    | SI  | RSI | Probability | Library | Molecular Formula | Molecular Weight |
|-------|-----|-----|-------------|---------|-------------------|------------------|
| 11.03 | 926 | 926 | 27.74       | replib  | C12H26O           | 186              |
| 11.03 | 928 | 929 | 27.74       | replib  | C12H26O           | 186              |
| 11.03 | 926 | 927 | 27.74       | replib  | C12H26O           | 186              |
| 11.03 | 964 | 964 | 27.74       | replib  | C12H26O           | 186              |
| 11.03 | 931 | 933 | 7.26        | replib  | C12H24            | 168              |

## Hit Spectrum

## Delta

## Compound Structure

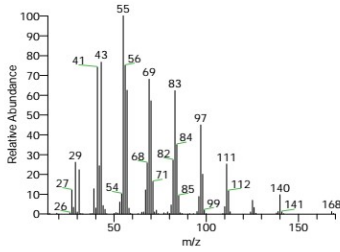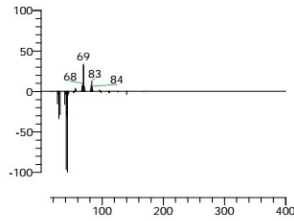

1-Dodecanol  
Formula C12H26O, MW 186, CAS# 112-53-8, Entry# 4595  
Dodecyl alcohol

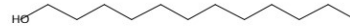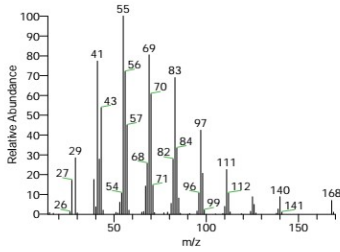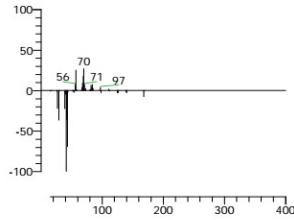

Cyclododecane  
Formula C12H24, MW 168, CAS# 294-62-2, Entry# 4733

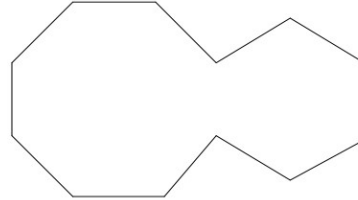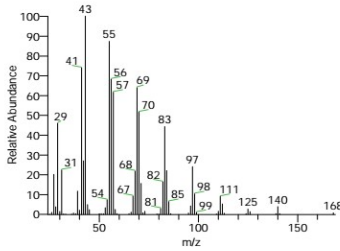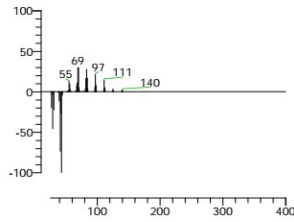

1-Dodecanol  
Formula C12H26O, MW 186, CAS# 112-53-8, Entry# 2001  
Dodecyl alcohol

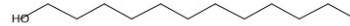



# ChemLab Technologies - GC/MS Report

Hit Spectrum

Delta

Compound Structure

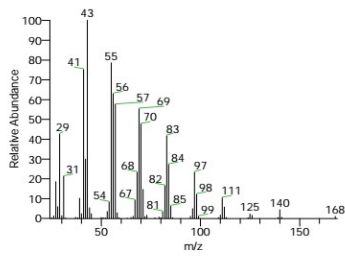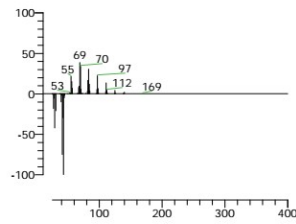

1-Dodecanol  
Formula C<sub>12</sub>H<sub>26</sub>O, MW 186, CAS# 112-53-8, Entry# 2000  
Dodecyl alcohol

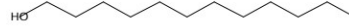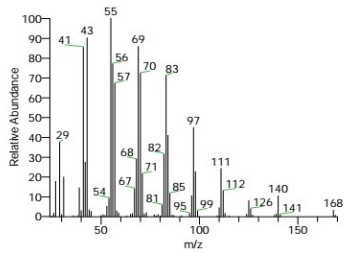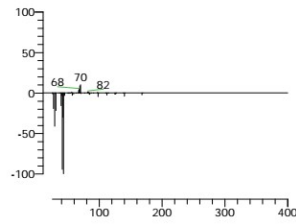

1-Dodecanol  
Formula C<sub>12</sub>H<sub>26</sub>O, MW 186, CAS# 112-53-8, Entry# 4614  
Dodecyl alcohol

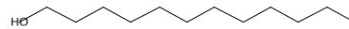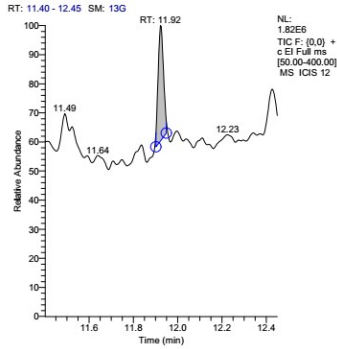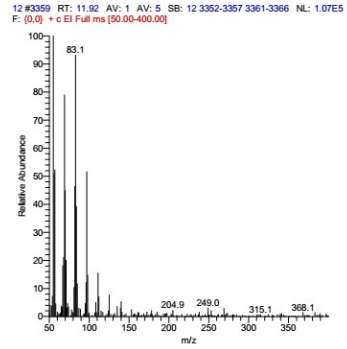

| RT    | SI  | RSI | Probability | Library  | Molecular Formula                 | Molecular Weight |
|-------|-----|-----|-------------|----------|-----------------------------------|------------------|
| 11.92 | 766 | 904 | 7.73        | replib   | C <sub>14</sub> H <sub>28</sub>   | 196              |
| 11.92 | 760 | 893 | 6.08        | NISTDEMO | C <sub>13</sub> H <sub>28</sub> O | 200              |
| 11.92 | 753 | 876 | 4.78        | replib   | C <sub>16</sub> H <sub>34</sub> O | 242              |
| 11.92 | 754 | 880 | 4.78        | mainlib  | C <sub>16</sub> H <sub>34</sub> O | 242              |
| 11.92 | 753 | 886 | 4.59        | replib   | C <sub>14</sub> H <sub>28</sub>   | 196              |



# ChemLab Technologies - GC/MS Report

Hit Spectrum

Delta

Compound Structure

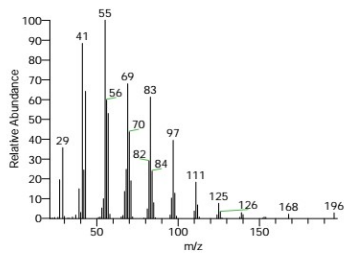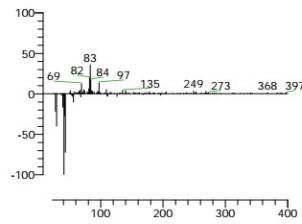

Cyclohexadecane  
Formula C<sub>14</sub>H<sub>28</sub>, MW 196, CAS# 295-17-0, Entry# 4454

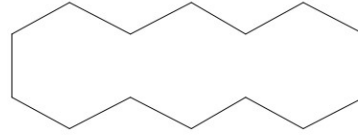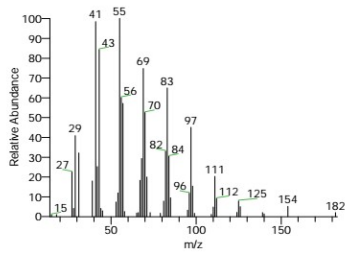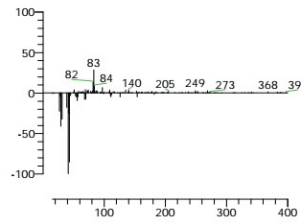

n-Tridecan-1-ol  
Formula C<sub>13</sub>H<sub>28</sub>O, MW 200, CAS# 112-70-9, Entry# 646

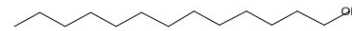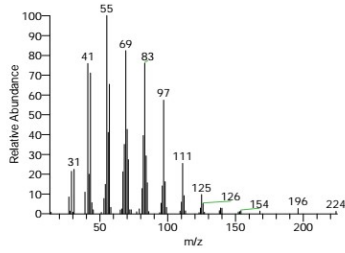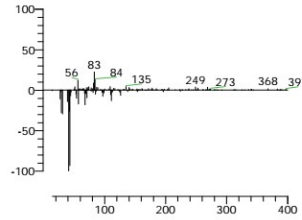

1-Hexadecanol  
Formula C<sub>16</sub>H<sub>34</sub>O, MW 242, CAS# 36653-82-4, Entry# 18939

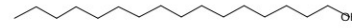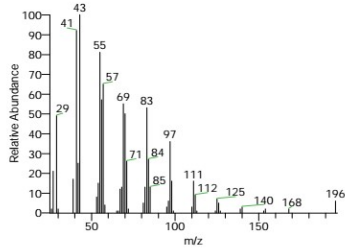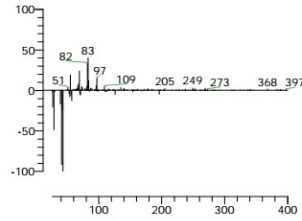

1-Tetradecene  
Formula C<sub>14</sub>H<sub>28</sub>, MW 196, CAS# 1120-36-1, Entry# 1735

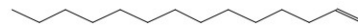







# ChemLab Technologies - GC/MS Report

Hit Spectrum

Delta

Compound Structure

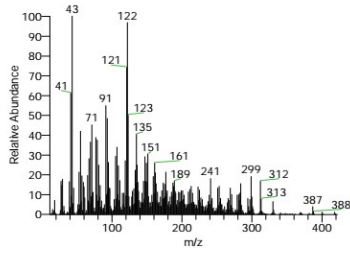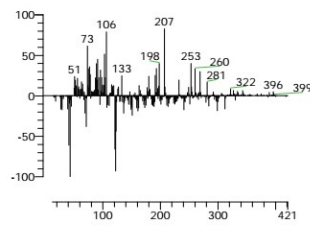

Formula C<sub>24</sub>H<sub>34</sub>O<sub>6</sub>, MW 418, CAS# 77508-67-9, Entry# 10997

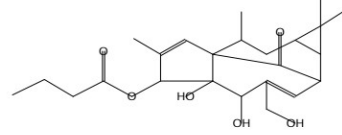

Pregnan-20-one, 3-(acetyloxy)-5,6,16,17-diepoxy-, (3a,5a,6a,16a)-  
Formula C<sub>23</sub>H<sub>32</sub>O<sub>5</sub>, MW 388, CAS# 14231-06-2, Entry# 202587  
5a-Pregnan-20-one, 5,6a,16a,17-diepoxy-3a-hydroxy-, acetate

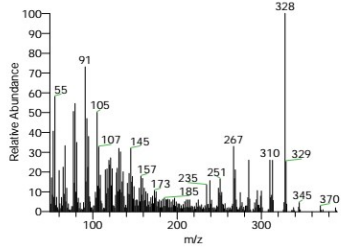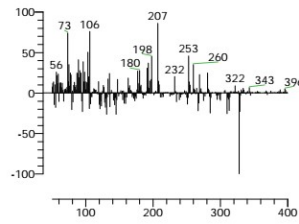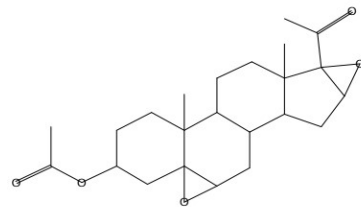

9,10-Secocholesta-5,7,10(19)-triene-3,24,25-triol, (3a,5Z,7E)-  
Formula C<sub>27</sub>H<sub>44</sub>O<sub>3</sub>, MW 416, CAS# 40013-87-4, Entry# 6382  
24,25-Dihydroxycholecalciferol

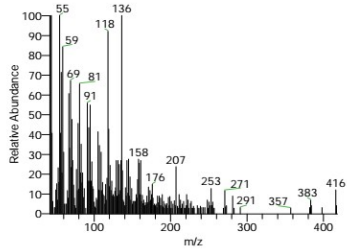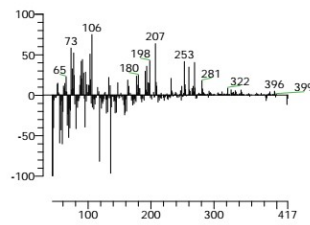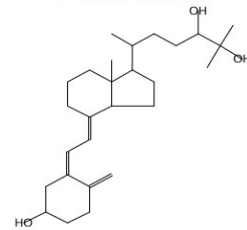

Formula C<sub>16</sub>H<sub>20</sub>O<sub>4</sub>, MW 276, CAS# 19892-19-4, Entry# 9616

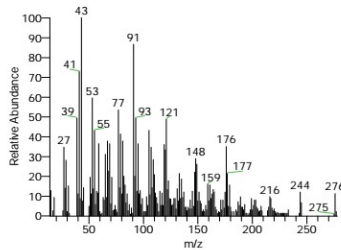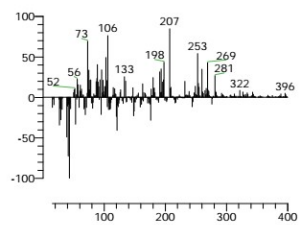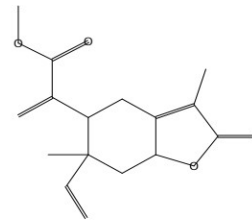

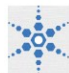

# ChemLab Technologies - GC/MS Report

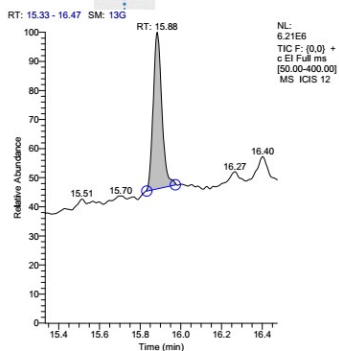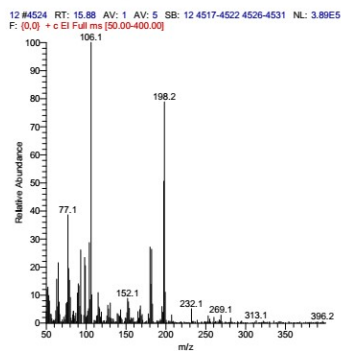

| RT    | SI  | RSI | Probability | Library  | Molecular Formula | Molecular Weight |
|-------|-----|-----|-------------|----------|-------------------|------------------|
| 15.88 | 813 | 876 | 52.53       | mainlib  | C13H14N2          | 198              |
| 15.88 | 813 | 876 | 52.53       | NISTDEMO | C13H14N2          | 198              |
| 15.88 | 796 | 856 | 34.98       | replib   | C13H14N2          | 198              |
| 15.88 | 774 | 825 | 34.98       | NISTDEMO | C13H14N2          | 198              |
| 15.88 | 801 | 858 | 34.98       | replib   | C13H14N2          | 198              |

## Hit Spectrum

## Delta

## Compound Structure

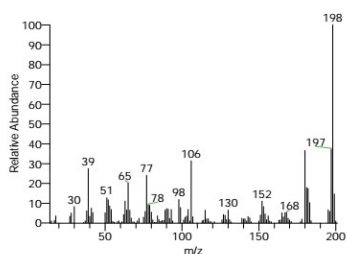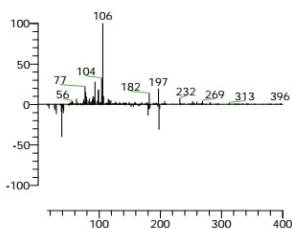

3,3'-Diaminodiphenylmethane  
Formula C13H14N2, MW 198, CAS# 19471-12-6, Entry# 215  
3-(3-Aminobenzyl)phenylamine #

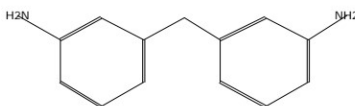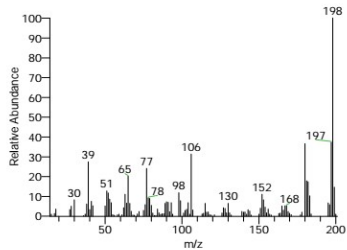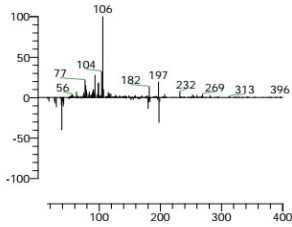

3,3'-Diaminodiphenylmethane  
Formula C13H14N2, MW 198, CAS# 19471-12-6, Entry# 161610  
3-(3-Aminobenzyl)phenylamine #

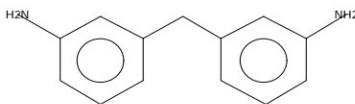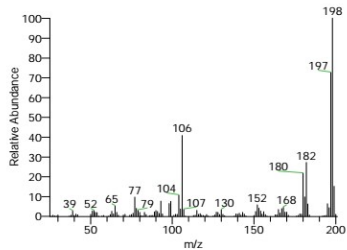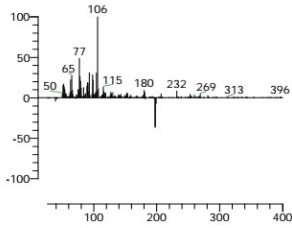

Benzenamine, 4,4'-methylenebis-  
Formula C13H14N2, MW 198, CAS# 101-77-9, Entry# 26389  
Aniline, 4,4'-methylene-

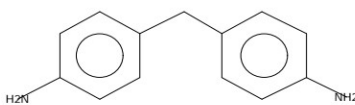



# ChemLab Technologies - GC/MS Report

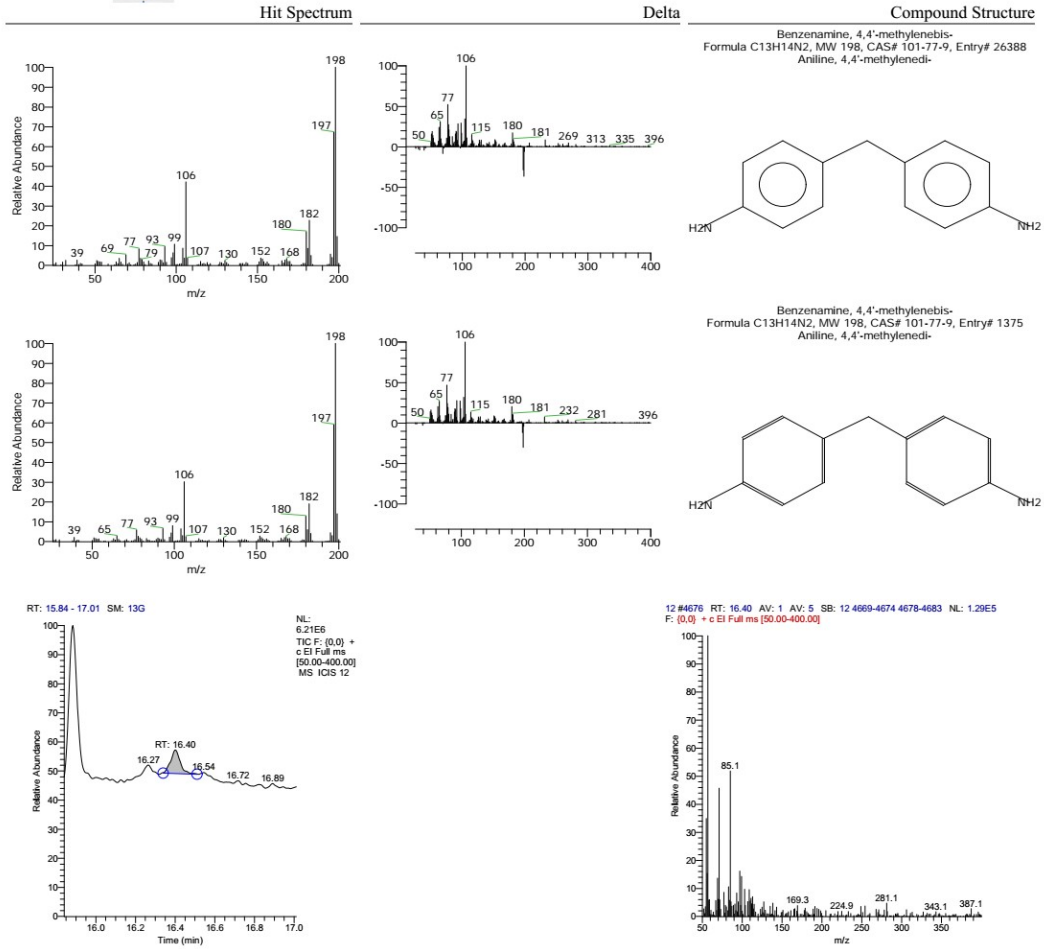

| RT    | SI  | RSI | Probability | Library | Molecular Formula               | Molecular Weight |
|-------|-----|-----|-------------|---------|---------------------------------|------------------|
| 16.40 | 580 | 642 | 18.21       | replib  | C <sub>26</sub> H <sub>54</sub> | 366              |
| 16.40 | 618 | 647 | 18.21       | mainlib | C <sub>26</sub> H <sub>54</sub> | 366              |
| 16.40 | 587 | 681 | 4.96        | mainlib | C <sub>26</sub> H <sub>54</sub> | 366              |
| 16.40 | 584 | 665 | 4.38        | replib  | C <sub>44</sub> H <sub>90</sub> | 618              |
| 16.40 | 583 | 682 | 4.21        | mainlib | C <sub>26</sub> H <sub>54</sub> | 366              |



# ChemLab Technologies - GC/MS Report

Hit Spectrum

Delta

Compound Structure

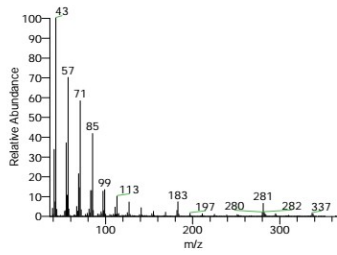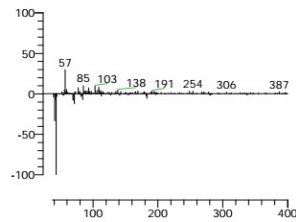

Octadecane, 3-ethyl-5-(2-ethylbutyl)-  
Formula C<sub>26</sub>H<sub>54</sub>, MW 366, CAS# 55282-12-7, Entry# 7471  
3-Ethyl-5-(2-ethylbutyl)octadecane

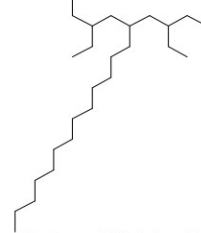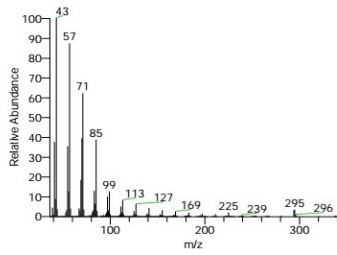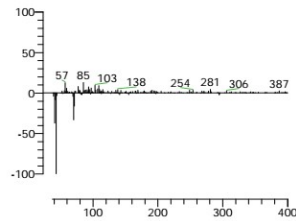

Heneicosane, 11-(1-ethylpropyl)-  
Formula C<sub>26</sub>H<sub>54</sub>, MW 366, CAS# 55282-11-6, Entry# 7468  
11-(1-Ethylpropyl)heneicosane

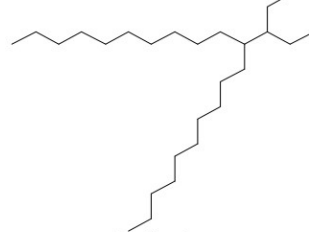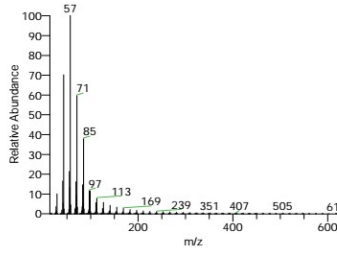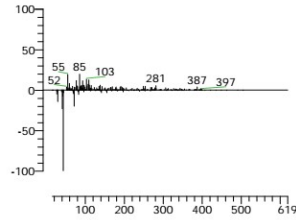

Tetratetracontane  
Formula C<sub>44</sub>H<sub>90</sub>, MW 618, CAS# 7098-22-8, Entry# 5823  
n-Tetratetracontane

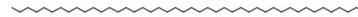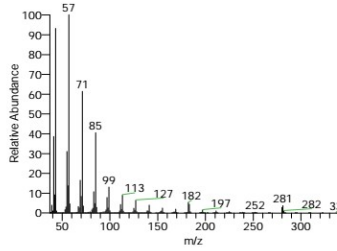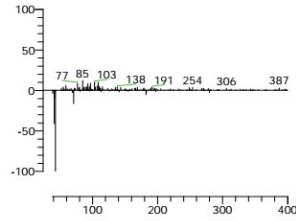

Eicosane, 7-hexyl-  
Formula C<sub>26</sub>H<sub>54</sub>, MW 366, CAS# 55333-99-8, Entry# 22628  
7-n-Hexyleicosane

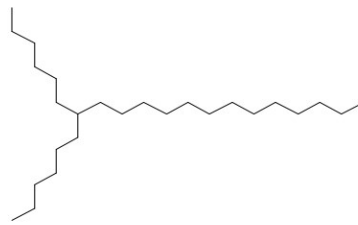

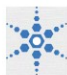

# ChemLab Technologies - GC/MS Report

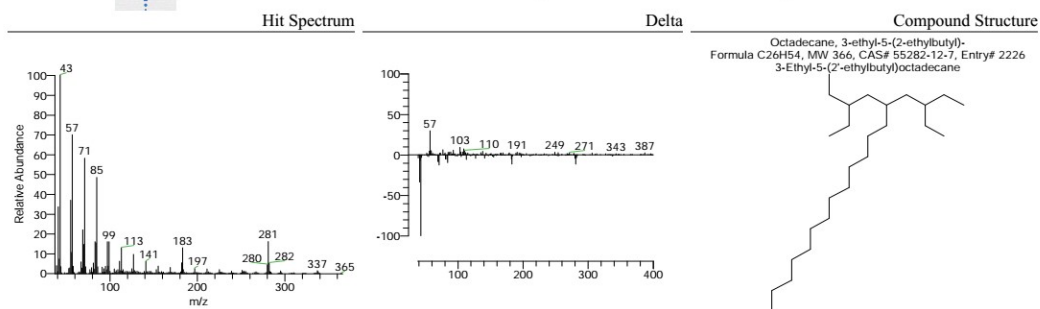

**Fig. S1** GC-MS data of the volatile reaction products.
